# Supplementary material for: Stepping stones sustain bird connectivity at intermediate forest cover: implications for tropical forest conservation
Source: Research Square preprint supplement (doi:10.21203/rs.3.rs-8395368/v1), 2026-01-28
Supplement: Supplementary file 1 [file f3f98c17554b36dd5177c551.xlsx]

## Sheet: Table S1 landscape coordinates
id	id_region	id_landscape	latitude_wgs84_UTM23S	longitude_wgs84_UTM23S
1_1	1	1	7625536	404250
1_10	1	10	7625353	403920
1_11	1	11	7624938	403923
1_12	1	12	7624845	403327
1_13	1	13	7624376	404622
1_14	1	14	7624390	404821
1_15	1	15	7624610	403573
1_2	1	2	7625470	404435
1_3	1	3	7625305	404225
1_4	1	4	7625147	404457
1_5	1	5	7625232	404793
1_6	1	6	7624933	404622
1_7	1	7	7625739	403642
1_8	1	8	7625212	403492
1_9	1	9	7625253	403736
10_1	10	1	7630779	374079
10_10	10	10	7629859	374343
10_11	10	11	7629915	374034
10_12	10	12	7629971	373746
10_13	10	13	7630124	373661
10_14	10	14	7630404	373676
10_15	10	15	7630625	373988
10_2	10	2	7630891	373886
10_3	10	3	7630841	373756
10_4	10	4	7630819	373690
10_5	10	5	7630689	373625
10_6	10	6	7630419	374825
10_7	10	7	7630348	374748
10_8	10	8	7630224	374659
10_9	10	9	7630161	374504
11_1	11	1	7628102	382017
11_10	11	10	7628314	381946
11_11	11	11	7628535	381927
11_12	11	12	7628625	381694
11_13	11	13	7628550	381490
11_14	11	14	7628401	381243
11_15	11	15	7628662	381241
11_2	11	2	7628175	381875
11_3	11	3	7628081	381721
11_4	11	4	7628286	381564
11_5	11	5	7628239	381374
11_6	11	6	7628151	381205
11_7	11	7	7627959	381051
11_8	11	8	7628057	381344
11_9	11	9	7628089	381542
12_1	12	1	7632134	380056
12_10	12	10	7632816	379460
12_11	12	11	7632688	379323
12_12	12	12	7632702	379136
12_13	12	13	7632436	379224
12_14	12	14	7632613	379554
12_15	12	15	7632445	379679
12_2	12	2	7632044	379898
12_3	12	3	7632187	379741
12_4	12	4	7632103	379546
12_5	12	5	7631970	379484
12_6	12	6	7632030	379290
12_7	12	7	7631974	379227
12_8	12	8	7632072	379140
12_9	12	9	7632759	379648
2_1	2	1	7671532	383699
2_10	2	10	7671356	384551
2_11	2	11	7670811	384414
2_12	2	12	7670163	384441
2_13	2	13	7669864	384455
2_14	2	14	7669704	384430
2_15	2	15	7669941	384408
2_2	2	2	7671449	383717
2_3	2	3	7671512	383860
2_4	2	4	7671576	383906
2_5	2	5	7671218	384555
2_6	2	6	7670757	384587
2_7	2	7	7670523	384494
2_8	2	8	7670378	384408
2_9	2	9	7671262	384719
3_1	3	1	7653261	386324
3_10	3	10	7653041	387479
3_11	3	11	7652901	387590
3_12	3	12	7652661	387557
3_13	3	13	7652516	387592
3_14	3	14	7652520	387742
3_15	3	15	7653129	387317
3_2	3	2	7653081	386170
3_3	3	3	7652850	386529
3_4	3	4	7652487	386970
3_5	3	5	7652809	386766
3_6	3	6	7653213	386547
3_7	3	7	7653323	386823
3_8	3	8	7653499	386908
3_9	3	9	7653373	387364
4_1	4	1	7661181	403603
4_10	4	10	7661281	402206
4_11	4	11	7661408	402447
4_12	4	12	7660827	402512
4_13	4	13	7660533	402577
4_14	4	14	7660348	402615
4_15	4	15	7660164	402588
4_2	4	2	7661143	403372
4_3	4	3	7661187	403086
4_4	4	4	7661107	402579
4_5	4	5	7661024	402438
4_6	4	6	7660887	402269
4_7	4	7	7660816	402197
4_8	4	8	7660947	401986
4_9	4	9	7661217	402434
5_1	5	1	7654725	418524
5_10	5	10	7655338	418754
5_11	5	11	7655302	418339
5_12	5	12	7654889	418113
5_13	5	13	7654088	418380
5_14	5	14	7653816	418681
5_15	5	15	7654006	418663
5_2	5	2	7654544	418516
5_3	5	3	7654398	418393
5_4	5	4	7654502	418182
5_5	5	5	7654554	418043
5_6	5	6	7654223	418373
5_7	5	7	7654687	418867
5_8	5	8	7655026	419080
5_9	5	9	7655222	418847
6_1	6	1	7629299	421313
6_10	6	10	7629217	422122
6_11	6	11	7629506	422089
6_12	6	12	7629700	422140
6_13	6	13	7629887	422134
6_14	6	14	7629867	422327
6_15	6	15	7629831	421941
6_2	6	2	7629440	421125
6_3	6	3	7629442	420964
6_4	6	4	7629460	420814
6_5	6	5	7629436	421563
6_6	6	6	7629430	421756
6_7	6	7	7629480	421925
6_8	6	8	7629228	421953
6_9	6	9	7628989	422003
7_1	7	1	7622278	408105
7_10	7	10	7622315	409777
7_11	7	11	7622151	409634
7_12	7	12	7621969	409594
7_13	7	13	7622608	409502
7_14	7	14	7622833	409527
7_15	7	15	7622582	409810
7_2	7	2	7622041	408089
7_3	7	3	7622293	408669
7_4	7	4	7622344	408896
7_5	7	5	7622544	408906
7_6	7	6	7622688	408940
7_7	7	7	7622126	407999
7_8	7	8	7622600	409105
7_9	7	9	7622718	409259
8_1	8	1	7643011	383119
8_10	8	10	7643106	383430
8_11	8	11	7643067	383586
8_12	8	12	7642893	382941
8_13	8	13	7642758	382945
8_14	8	14	7642804	383881
8_15	8	15	7642508	385030
8_2	8	2	7642836	382645
8_3	8	3	7642375	384080
8_4	8	4	7642441	384247
8_5	8	5	7642594	384958
8_6	8	6	7642827	385339
8_7	8	7	7642914	385094
8_8	8	8	7642917	385503
8_9	8	9	7642514	383278
9_1	9	1	7638324	379552
9_10	9	10	7638734	378451
9_11	9	11	7638815	379113
9_12	9	12	7638847	379194
9_13	9	13	7638740	379359
9_14	9	14	7638723	379540
9_15	9	15	7638487	379646
9_2	9	2	7638243	379518
9_3	9	3	7638471	379462
9_4	9	4	7638469	379312
9_5	9	5	7638619	379233
9_6	9	6	7638147	379409
9_7	9	7	7638667	379005
9_8	9	8	7638771	378903
9_9	9	9	7638757	378673

## Sheet: Table S2 dataset_sampling point
id	region	landscape	species_birdlife	abundance	Habitat	Trophic_Niche	Primary_Lifestyle	Distance from nearest forest patch	ed_50	np_50	pland_50	ed_100	np_100	pland_100	ed_200	np_200	pland_200
11_3	Reg_11	Land_3	Amazilia lactea	1	Forest	Nectarivore	Aerial	63.23	140.351	2	3.21637	151.745	5	15.3263	95.4969	14	14.771
4_10	Reg_4	Land_10	Amazonetta brasiliensis	2	Wetland	Herbivore aquatic	Aquatic	11.56	532.164	9	15.2047	251.897	21	5.84219	133.929	38	3.26087
4_4	Reg_4	Land_4	Amazonetta brasiliensis	2	Wetland	Herbivore aquatic	Aquatic	63.51	360.465	7	8.13953	248.862	16	7.20789	142.026	31	5.82072
6_13	Reg_6	Land_13	Amazonetta brasiliensis	1	Wetland	Herbivore aquatic	Aquatic	22.46	139.535	1	19.186	72.8376	1	6.14568	18.6263	1	1.57159
6_14	Reg_6	Land_14	Amazonetta brasiliensis	2	Wetland	Herbivore aquatic	Aquatic	146.8	0	0	0	0	0	0	11.6482	1	1.16482
3_12	Reg_3	Land_12	Ammodramus humeralis	1	Grassland	Granivore	Terrestrial	22.46	98.5507	1	7.82609	169.954	5	27.8452	190.92	28	41.7734
8_15	Reg_8	Land_15	Anhinga anhinga	1	Wetland	Aquatic predator	Aquatic	20.7	34.7826	1	0.57971	92.5645	7	5.08346	118.789	23	9.53028
10_1	Reg_10	Land_1	Aratinga auricapillus	6	Forest	Omnivore	Insessorial	27.73	34.8837	1	2.03488	63.6846	1	8.64291	77.6096	10	5.6849
10_15	Reg_10	Land_15	Aratinga auricapillus	1	Forest	Omnivore	Insessorial	23.82	0	0	0	9.07029	1	0.151172	40.7609	11	1.18401
10_15	Reg_10	Land_15	Aratinga auricapillus	5	Forest	Omnivore	Insessorial	23.82	0	0	0	9.07029	1	0.151172	40.7609	11	1.18401
10_4	Reg_10	Land_4	Aratinga auricapillus	9	Forest	Omnivore	Insessorial	191.52	69.7674	3	1.16279	66.7678	5	1.28983	82.0373	30	1.74961
11_8	Reg_11	Land_8	Aratinga auricapillus	3	Forest	Omnivore	Insessorial	24.3	151.163	3	8.13953	220.03	12	10.6222	150.563	14	17.9278
12_14	Reg_12	Land_14	Aratinga auricapillus	2	Forest	Omnivore	Insessorial	73.11	75.5814	3	2.03488	142.316	12	4.46631	143.606	30	16.7863
2_13	Reg_2	Land_13	Aratinga auricapillus	3	Forest	Omnivore	Insessorial	8	215.116	5	9.30233	139.605	8	8.5736	148.523	31	9.79782
2_3	Reg_2	Land_3	Aratinga auricapillus	4	Forest	Omnivore	Insessorial	214.58	153.392	5	2.94985	92.6348	9	1.74639	47.3694	16	0.834789
2_3	Reg_2	Land_3	Aratinga auricapillus	2	Forest	Omnivore	Insessorial	214.58	153.392	5	2.94985	92.6348	9	1.74639	47.3694	16	0.834789
2_7	Reg_2	Land_7	Aratinga auricapillus	1	Forest	Omnivore	Insessorial	43.09	87.2093	1	4.94186	192.279	8	15.8213	141.665	21	35.4745
2_8	Reg_2	Land_8	Aratinga auricapillus	16	Forest	Omnivore	Insessorial	114.24	127.907	4	2.61628	122.356	11	2.26586	153.309	41	6.86978
2_9	Reg_2	Land_9	Aratinga auricapillus	7	Forest	Omnivore	Insessorial	10.4	226.744	1	33.7209	112.291	1	39.302	101.669	11	43.5972
4_6	Reg_4	Land_6	Aratinga auricapillus	2	Forest	Omnivore	Insessorial	3.56	470.93	8	17.1512	257.967	16	12.5948	231.277	64	12.5146
8_12	Reg_8	Land_12	Ardea alba	1	Wetland	Aquatic predator	Terrestrial	231.57	0	0	0	0	0	0	15.1427	5	0.388274
8_13	Reg_8	Land_13	Ardea alba	3	Wetland	Aquatic predator	Terrestrial	209.91	0	0	0	0	0	0	6.98758	2	0.15528
8_15	Reg_8	Land_15	Ardea alba	12	Wetland	Aquatic predator	Terrestrial	20.7	34.7826	1	0.57971	92.5645	7	5.08346	118.789	23	9.53028
2_10	Reg_2	Land_10	Ardea cocoi	2	Wetland	Aquatic predator	Terrestrial	103.7	0	0	0	9.1047	1	0.151745	16.6925	2	1.90217
2_11	Reg_2	Land_11	Ardea cocoi	1	Wetland	Aquatic predator	Terrestrial	14.86	272.464	2	37.1014	207.733	6	36.0121	142.414	16	37.4854
2_12	Reg_2	Land_12	Ardea cocoi	1	Wetland	Aquatic predator	Terrestrial	35.77	197.101	5	12.4638	261.725	14	17.3222	222.093	49	11.2017
7_13	Reg_7	Land_13	Arundinicola leucocephala	1	Wetland	Invertivore	Insessorial	92.4	0	0	0	9.08403	2	0.302801	91.9496	10	14.452
1_10	Reg_1	Land_10	Brotogeris chiriri	17	Forest	Omnivore	Insessorial	5.02	156.522	1	8.4058	159.332	11	4.24886	173.525	38	10.0932
1_14	Reg_1	Land_14	Brotogeris chiriri	6	Forest	Omnivore	Insessorial	0	208.696	1	60	199.697	3	45.6127	140.889	3	28.1584
1_2	Reg_1	Land_2	Brotogeris chiriri	2	Forest	Omnivore	Insessorial	39.04	273.256	9	5.52326	238.421	18	5.08732	229.858	68	6.77538
1_8	Reg_1	Land_8	Brotogeris chiriri	2	Forest	Omnivore	Insessorial	138.26	0	0	0	36.4188	3	0.682853	81.5376	19	11.9006
1_9	Reg_1	Land_9	Brotogeris chiriri	2	Forest	Omnivore	Insessorial	13.66	226.087	3	21.4493	201.21	3	34.8714	144.05	19	30.6737
12_12	Reg_12	Land_12	Brotogeris chiriri	2	Forest	Omnivore	Insessorial	22.46	145.349	1	11.6279	193.939	8	18.3333	140.473	31	16.8801
2_1	Reg_2	Land_1	Brotogeris chiriri	5	Forest	Omnivore	Insessorial	65.41	0	0	0	51.5933	4	0.91047	32.596	11	0.582072
3_13	Reg_3	Land_13	Brotogeris chiriri	2	Forest	Omnivore	Insessorial	15.88	127.536	2	4.92754	182.094	13	4.77997	199.457	49	22.3128
3_14	Reg_3	Land_14	Brotogeris chiriri	2	Forest	Omnivore	Insessorial	33.76	151.163	2	10.7558	165.026	9	19.9849	160.745	32	31.9744
3_15	Reg_3	Land_15	Brotogeris chiriri	7	Forest	Omnivore	Insessorial	25.4	23.1214	1	0.867052	83.1444	5	8.76795	183.511	33	18.3705
7_3	Reg_7	Land_3	Brotogeris chiriri	2	Forest	Omnivore	Insessorial	0	162.791	4	3.19767	90.8403	8	1.5897	35.7074	12	0.853872
8_3	Reg_8	Land_3	Brotogeris chiriri	2	Forest	Omnivore	Insessorial	19.64	244.186	7	4.36047	490.509	35	10.9339	297.03	77	11.0464
9_11	Reg_9	Land_11	Brotogeris chiriri	4	Forest	Omnivore	Insessorial	5.02	542.274	4	44.6064	275.132	12	60.2419	219.72	31	45.7686
9_11	Reg_9	Land_11	Brotogeris chiriri	2	Forest	Omnivore	Insessorial	5.02	542.274	4	44.6064	275.132	12	60.2419	219.72	31	45.7686
9_11	Reg_9	Land_11	Brotogeris chiriri	2	Forest	Omnivore	Insessorial	5.02	542.274	4	44.6064	275.132	12	60.2419	219.72	31	45.7686
9_4	Reg_9	Land_4	Brotogeris chiriri	2	Forest	Omnivore	Insessorial	73.56	0	0	0	60.4686	2	5.51776	130.747	18	13.9864
1_1	Reg_1	Land_1	Bubulcus ibis	10	Human Modified	Omnivore	Terrestrial	39.04	703.812	17	13.1965	497.724	42	11.7602	379.585	102	16.437
1_2	Reg_1	Land_2	Bubulcus ibis	2	Human Modified	Omnivore	Terrestrial	39.04	273.256	9	5.52326	238.421	18	5.08732	229.858	68	6.77538
1_3	Reg_1	Land_3	Bubulcus ibis	1	Human Modified	Omnivore	Terrestrial	77.54	34.8837	1	0.581395	168.565	13	5.39104	250.049	58	13.8031
10_14	Reg_10	Land_14	Bubulcus ibis	14	Human Modified	Omnivore	Terrestrial	40.7	0	0	0	86.5604	2	17.9954	51.2522	3	26.325
12_13	Reg_12	Land_13	Bubulcus ibis	6	Human Modified	Omnivore	Terrestrial	130.36	110.145	5	2.31884	225.929	21	4.62472	193.248	58	4.94761
2_1	Reg_2	Land_1	Bubulcus ibis	5	Human Modified	Omnivore	Terrestrial	65.41	0	0	0	51.5933	4	0.91047	32.596	11	0.582072
2_8	Reg_2	Land_8	Bubulcus ibis	3	Human Modified	Omnivore	Terrestrial	114.24	127.907	4	2.61628	122.356	11	2.26586	153.309	41	6.86978
4_10	Reg_4	Land_10	Bubulcus ibis	1	Human Modified	Omnivore	Terrestrial	11.56	532.164	9	15.2047	251.897	21	5.84219	133.929	38	3.26087
4_10	Reg_4	Land_10	Bubulcus ibis	2	Human Modified	Omnivore	Terrestrial	11.56	532.164	9	15.2047	251.897	21	5.84219	133.929	38	3.26087
5_13	Reg_5	Land_13	Bubulcus ibis	3	Human Modified	Omnivore	Terrestrial	19.9	34.7826	1	0.57971	75.8725	6	2.27618	86.9565	16	2.71739
5_3	Reg_5	Land_3	Bubulcus ibis	1	Human Modified	Omnivore	Terrestrial	21.19	93.0233	1	1.74419	45.3172	3	0.906344	170.774	38	9.00446
5_6	Reg_5	Land_6	Bubulcus ibis	1	Human Modified	Omnivore	Terrestrial	33.37	139.535	4	6.39535	125.378	5	5.13595	123.035	21	5.49195
5_6	Reg_5	Land_6	Bubulcus ibis	3	Human Modified	Omnivore	Terrestrial	33.37	139.535	4	6.39535	125.378	5	5.13595	123.035	21	5.49195
7_1	Reg_7	Land_1	Bubulcus ibis	15	Human Modified	Omnivore	Terrestrial	94.35	11.5942	1	0.289855	95.5994	10	1.59332	129.658	32	5.2795
7_1	Reg_7	Land_1	Bubulcus ibis	14	Human Modified	Omnivore	Terrestrial	94.35	11.5942	1	0.289855	95.5994	10	1.59332	129.658	32	5.2795
7_10	Reg_7	Land_10	Bubulcus ibis	1	Human Modified	Omnivore	Terrestrial	197.99	0	0	0	0	0	0	8.15376	4	0.174723
7_10	Reg_7	Land_10	Bubulcus ibis	1	Human Modified	Omnivore	Terrestrial	197.99	0	0	0	0	0	0	8.15376	4	0.174723
7_8	Reg_7	Land_8	Bubulcus ibis	2	Human Modified	Omnivore	Terrestrial	100.29	0	0	0	9.11162	1	0.15186	58.6294	12	3.12561
7_8	Reg_7	Land_8	Bubulcus ibis	7	Human Modified	Omnivore	Terrestrial	100.29	0	0	0	9.11162	1	0.15186	58.6294	12	3.12561
7_8	Reg_7	Land_8	Bubulcus ibis	7	Human Modified	Omnivore	Terrestrial	100.29	0	0	0	9.11162	1	0.15186	58.6294	12	3.12561
7_9	Reg_7	Land_9	Bubulcus ibis	17	Human Modified	Omnivore	Terrestrial	0	156.977	1	53.7791	115.064	1	31.2642	99.3596	10	20.9393
8_1	Reg_8	Land_1	Bubulcus ibis	1	Human Modified	Omnivore	Terrestrial	213.56	28.9855	1	0.869565	33.3586	3	0.833965	35.3124	13	0.756694
8_1	Reg_8	Land_1	Bubulcus ibis	5	Human Modified	Omnivore	Terrestrial	213.56	28.9855	1	0.869565	33.3586	3	0.833965	35.3124	13	0.756694
8_1	Reg_8	Land_1	Bubulcus ibis	4	Human Modified	Omnivore	Terrestrial	213.56	28.9855	1	0.869565	33.3586	3	0.833965	35.3124	13	0.756694
8_1	Reg_8	Land_1	Bubulcus ibis	1	Human Modified	Omnivore	Terrestrial	213.56	28.9855	1	0.869565	33.3586	3	0.833965	35.3124	13	0.756694
8_11	Reg_8	Land_11	Bubulcus ibis	1	Human Modified	Omnivore	Terrestrial	32.7	313.953	6	25	283.333	20	26.1364	299.573	72	21.1098
8_14	Reg_8	Land_14	Bubulcus ibis	2	Human Modified	Omnivore	Terrestrial	28.76	338.192	7	21.5743	321.944	19	35.1557	231.023	49	33.4498
8_9	Reg_8	Land_9	Bubulcus ibis	2	Human Modified	Omnivore	Terrestrial	39.82	235.632	6	8.04598	146.305	10	5.20362	99.2248	30	2.73256
8_9	Reg_8	Land_9	Bubulcus ibis	1	Human Modified	Omnivore	Terrestrial	39.82	235.632	6	8.04598	146.305	10	5.20362	99.2248	30	2.73256
8_9	Reg_8	Land_9	Bubulcus ibis	1	Human Modified	Omnivore	Terrestrial	39.82	235.632	6	8.04598	146.305	10	5.20362	99.2248	30	2.73256
8_9	Reg_8	Land_9	Bubulcus ibis	1	Human Modified	Omnivore	Terrestrial	39.82	235.632	6	8.04598	146.305	10	5.20362	99.2248	30	2.73256
8_9	Reg_8	Land_9	Bubulcus ibis	1	Human Modified	Omnivore	Terrestrial	39.82	235.632	6	8.04598	146.305	10	5.20362	99.2248	30	2.73256
9_4	Reg_9	Land_4	Bubulcus ibis	1	Human Modified	Omnivore	Terrestrial	73.56	0	0	0	60.4686	2	5.51776	130.747	18	13.9864
9_5	Reg_9	Land_5	Bubulcus ibis	4	Human Modified	Omnivore	Terrestrial	22.06	264.368	4	20.1149	180.995	6	23.1523	164.341	16	24.7093
9_5	Reg_9	Land_5	Bubulcus ibis	2	Human Modified	Omnivore	Terrestrial	22.06	264.368	4	20.1149	180.995	6	23.1523	164.341	16	24.7093
9_5	Reg_9	Land_5	Bubulcus ibis	2	Human Modified	Omnivore	Terrestrial	22.06	264.368	4	20.1149	180.995	6	23.1523	164.341	16	24.7093
10_15	Reg_10	Land_15	Buteo brachyurus	1	Forest	Vertivore	Aerial	23.82	0	0	0	9.07029	1	0.151172	40.7609	11	1.18401
12_14	Reg_12	Land_14	Buteo brachyurus	2	Forest	Vertivore	Aerial	73.11	75.5814	3	2.03488	142.316	12	4.46631	143.606	30	16.7863
9_4	Reg_9	Land_4	Buteo brachyurus	1	Forest	Vertivore	Aerial	73.56	0	0	0	60.4686	2	5.51776	130.747	18	13.9864
1_15	Reg_1	Land_15	Buteogallus meridionalis	1	Grassland	Vertivore	Insessorial	65.42	116.618	2	2.33236	185.941	6	13.9078	177.019	21	30.5707
8_13	Reg_8	Land_13	Buteogallus meridionalis	1	Grassland	Vertivore	Insessorial	209.91	0	0	0	0	0	0	6.98758	2	0.15528
8_15	Reg_8	Land_15	Buteogallus meridionalis	1	Grassland	Vertivore	Insessorial	20.7	34.7826	1	0.57971	92.5645	7	5.08346	118.789	23	9.53028
6_3	Reg_6	Land_3	Cairina moschata	1	Wetland	Omnivore	Generalist	29.15	180.233	2	20.9302	118.361	4	32.8528	105.549	18	41.754
6_4	Reg_6	Land_4	Cairina moschata	1	Wetland	Omnivore	Generalist	39.06	115.942	1	8.4058	151.286	5	33.7368	119.519	10	54.3655
6_4	Reg_6	Land_4	Cairina moschata	1	Wetland	Omnivore	Generalist	39.06	115.942	1	8.4058	151.286	5	33.7368	119.519	10	54.3655
7_10	Reg_7	Land_10	Campephilus robustus	1	Forest	Invertivore	Insessorial	197.99	0	0	0	0	0	0	8.15376	4	0.174723
8_8	Reg_8	Land_8	Campephilus robustus	2	Forest	Invertivore	Insessorial	184.8	0	0	0	0	0	0	22.1402	2	1.34007
9_2	Reg_9	Land_2	Campephilus robustus	2	Forest	Invertivore	Insessorial	6.36	296.512	2	38.6628	205.438	4	23.1118	121.483	11	12.4394
12_10	Reg_12	Land_10	Camptostoma obsoletum	1	Shrubland	Invertivore	Insessorial	11.11	211.144	3	24.6334	168.437	6	43.5508	132.35	21	50.8442
4_14	Reg_4	Land_14	Camptostoma obsoletum	1	Shrubland	Invertivore	Insessorial	85.3	162.319	5	2.89855	183.612	17	3.64188	183.618	43	11.6848
4_8	Reg_4	Land_8	Camptostoma obsoletum	2	Shrubland	Invertivore	Insessorial	65.28	127.907	3	2.90698	146.97	17	2.87879	201.009	39	20.0233
7_12	Reg_7	Land_12	Camptostoma obsoletum	1	Shrubland	Invertivore	Insessorial	9.26	389.535	8	11.6279	218.347	19	5.30705	144.354	33	10.9818
7_4	Reg_7	Land_4	Camptostoma obsoletum	1	Shrubland	Invertivore	Insessorial	122.04	81.6327	1	2.04082	30.3721	2	0.683371	72.6073	19	2.07727
8_6	Reg_8	Land_6	Camptostoma obsoletum	2	Shrubland	Invertivore	Insessorial	15.71	0	0	0	0	0	0	19.0144	1	3.82227
1_1	Reg_1	Land_1	Caracara plancus	1	Shrubland	Omnivore	Terrestrial	39.04	703.812	17	13.1965	497.724	42	11.7602	379.585	102	16.437
1_13	Reg_1	Land_13	Caracara plancus	1	Shrubland	Omnivore	Terrestrial	6.54	237.681	4	20.2899	200.303	3	25.2656	142.414	16	14.8816
1_14	Reg_1	Land_14	Caracara plancus	2	Shrubland	Omnivore	Terrestrial	0	208.696	1	60	199.697	3	45.6127	140.889	3	28.1584
1_8	Reg_1	Land_8	Caracara plancus	1	Shrubland	Omnivore	Terrestrial	138.26	0	0	0	36.4188	3	0.682853	81.5376	19	11.9006
10_14	Reg_10	Land_14	Caracara plancus	1	Shrubland	Omnivore	Terrestrial	40.7	0	0	0	86.5604	2	17.9954	51.2522	3	26.325
11_11	Reg_11	Land_11	Caracara plancus	2	Shrubland	Omnivore	Terrestrial	25.65	180.233	2	28.7791	190.765	7	41.1052	119.2	11	56.7851
12_12	Reg_12	Land_12	Caracara plancus	1	Shrubland	Omnivore	Terrestrial	22.46	145.349	1	11.6279	193.939	8	18.3333	140.473	31	16.8801
12_12	Reg_12	Land_12	Caracara plancus	1	Shrubland	Omnivore	Terrestrial	22.46	145.349	1	11.6279	193.939	8	18.3333	140.473	31	16.8801
12_9	Reg_12	Land_9	Caracara plancus	3	Shrubland	Omnivore	Terrestrial	48.48	109.195	3	2.01149	177.979	12	12.8959	142.248	26	27.7519
12_9	Reg_12	Land_9	Caracara plancus	1	Shrubland	Omnivore	Terrestrial	48.48	109.195	3	2.01149	177.979	12	12.8959	142.248	26	27.7519
2_12	Reg_2	Land_12	Caracara plancus	1	Shrubland	Omnivore	Terrestrial	35.77	197.101	5	12.4638	261.725	14	17.3222	222.093	49	11.2017
2_3	Reg_2	Land_3	Caracara plancus	1	Shrubland	Omnivore	Terrestrial	214.58	153.392	5	2.94985	92.6348	9	1.74639	47.3694	16	0.834789
3_4	Reg_3	Land_4	Caracara plancus	1	Shrubland	Omnivore	Terrestrial	23.1	306.785	9	6.78466	382.688	33	7.66894	201.514	38	57.3675
3_5	Reg_3	Land_5	Caracara plancus	1	Shrubland	Omnivore	Terrestrial	6.3	174.927	4	7.28863	195.9	11	35.2316	144.438	21	49.3302
3_5	Reg_3	Land_5	Caracara plancus	1	Shrubland	Omnivore	Terrestrial	6.3	174.927	4	7.28863	195.9	11	35.2316	144.438	21	49.3302
3_6	Reg_3	Land_6	Caracara plancus	1	Shrubland	Omnivore	Terrestrial	71.91	93.0233	3	1.45349	90.8403	9	5.45042	129.195	27	15.3637
4_1	Reg_4	Land_1	Caracara plancus	1	Shrubland	Omnivore	Terrestrial	11.11	115.942	1	15.3623	107.739	2	23.4446	109.147	2	30.6079
4_1	Reg_4	Land_1	Caracara plancus	1	Shrubland	Omnivore	Terrestrial	11.11	115.942	1	15.3623	107.739	2	23.4446	109.147	2	30.6079
4_1	Reg_4	Land_1	Caracara plancus	1	Shrubland	Omnivore	Terrestrial	11.11	115.942	1	15.3623	107.739	2	23.4446	109.147	2	30.6079
4_10	Reg_4	Land_10	Caracara plancus	1	Shrubland	Omnivore	Terrestrial	11.56	532.164	9	15.2047	251.897	21	5.84219	133.929	38	3.26087
4_14	Reg_4	Land_14	Caracara plancus	1	Shrubland	Omnivore	Terrestrial	85.3	162.319	5	2.89855	183.612	17	3.64188	183.618	43	11.6848
4_15	Reg_4	Land_15	Caracara plancus	1	Shrubland	Omnivore	Terrestrial	30.54	201.149	4	4.02299	171.946	11	3.84615	123.256	27	3.93411
4_15	Reg_4	Land_15	Caracara plancus	1	Shrubland	Omnivore	Terrestrial	30.54	201.149	4	4.02299	171.946	11	3.84615	123.256	27	3.93411
4_15	Reg_4	Land_15	Caracara plancus	1	Shrubland	Omnivore	Terrestrial	30.54	201.149	4	4.02299	171.946	11	3.84615	123.256	27	3.93411
4_15	Reg_4	Land_15	Caracara plancus	1	Shrubland	Omnivore	Terrestrial	30.54	201.149	4	4.02299	171.946	11	3.84615	123.256	27	3.93411
4_15	Reg_4	Land_15	Caracara plancus	1	Shrubland	Omnivore	Terrestrial	30.54	201.149	4	4.02299	171.946	11	3.84615	123.256	27	3.93411
4_2	Reg_4	Land_2	Caracara plancus	1	Shrubland	Omnivore	Terrestrial	51.85	0	0	0	40.8781	1	5.82892	57.42	3	11.9884
4_7	Reg_4	Land_7	Caracara plancus	1	Shrubland	Omnivore	Terrestrial	50.83	440.58	12	8.4058	547.8	45	12.2914	264.261	70	31.9752
4_7	Reg_4	Land_7	Caracara plancus	1	Shrubland	Omnivore	Terrestrial	50.83	440.58	12	8.4058	547.8	45	12.2914	264.261	70	31.9752
4_7	Reg_4	Land_7	Caracara plancus	1	Shrubland	Omnivore	Terrestrial	50.83	440.58	12	8.4058	547.8	45	12.2914	264.261	70	31.9752
4_8	Reg_4	Land_8	Caracara plancus	1	Shrubland	Omnivore	Terrestrial	65.28	127.907	3	2.90698	146.97	17	2.87879	201.009	39	20.0233
4_9	Reg_4	Land_9	Caracara plancus	1	Shrubland	Omnivore	Terrestrial	45.13	127.907	3	2.03488	106.222	9	1.89681	112.922	32	2.96857
4_9	Reg_4	Land_9	Caracara plancus	1	Shrubland	Omnivore	Terrestrial	45.13	127.907	3	2.03488	106.222	9	1.89681	112.922	32	2.96857
5_11	Reg_5	Land_11	Caracara plancus	1	Shrubland	Omnivore	Terrestrial	41.57	0	0	0	51.5933	1	11.1533	76.8335	4	12.534
5_12	Reg_5	Land_12	Caracara plancus	1	Shrubland	Omnivore	Terrestrial	19.19	103.448	1	10.9195	102.564	1	20.6637	86.8217	1	19.7093
5_15	Reg_5	Land_15	Caracara plancus	1	Shrubland	Omnivore	Terrestrial	78.84	86.9565	3	2.02899	72.8376	4	1.51745	62.5364	22	1.1847
5_5	Reg_5	Land_5	Caracara plancus	1	Shrubland	Omnivore	Terrestrial	50.91	22.9885	1	0.862069	75.4148	1	9.65309	77.5194	2	12.9651
5_9	Reg_5	Land_9	Caracara plancus	1	Shrubland	Omnivore	Terrestrial	26.2	215.116	4	8.13953	285.281	8	32.4734	192.972	21	25.5484
6_12	Reg_6	Land_12	Caracara plancus	1	Shrubland	Omnivore	Terrestrial	28.1	0	0	0	0	0	0	0	0	0
6_12	Reg_6	Land_12	Caracara plancus	1	Shrubland	Omnivore	Terrestrial	28.1	0	0	0	0	0	0	0	0	0
6_14	Reg_6	Land_14	Caracara plancus	1	Shrubland	Omnivore	Terrestrial	146.8	0	0	0	0	0	0	11.6482	1	1.16482
6_9	Reg_6	Land_9	Caracara plancus	1	Shrubland	Omnivore	Terrestrial	28.63	0	0	0	0	0	0	0	0	0
7_3	Reg_7	Land_3	Caracara plancus	2	Shrubland	Omnivore	Terrestrial	0	162.791	4	3.19767	90.8403	8	1.5897	35.7074	12	0.853872
7_7	Reg_7	Land_7	Caracara plancus	1	Shrubland	Omnivore	Terrestrial	14.2	63.7681	1	4.92754	103.108	2	8.26384	165.697	17	22.0605
7_7	Reg_7	Land_7	Caracara plancus	2	Shrubland	Omnivore	Terrestrial	14.2	63.7681	1	4.92754	103.108	2	8.26384	165.697	17	22.0605
8_13	Reg_8	Land_13	Caracara plancus	1	Shrubland	Omnivore	Terrestrial	209.91	0	0	0	0	0	0	6.98758	2	0.15528
8_15	Reg_8	Land_15	Caracara plancus	1	Shrubland	Omnivore	Terrestrial	20.7	34.7826	1	0.57971	92.5645	7	5.08346	118.789	23	9.53028
8_15	Reg_8	Land_15	Caracara plancus	1	Shrubland	Omnivore	Terrestrial	20.7	34.7826	1	0.57971	92.5645	7	5.08346	118.789	23	9.53028
8_2	Reg_8	Land_2	Caracara plancus	1	Shrubland	Omnivore	Terrestrial	509.54	0	0	0	0	0	0	0	0	0
8_5	Reg_8	Land_5	Caracara plancus	2	Shrubland	Omnivore	Terrestrial	32.39	379.31	10	8.62069	295.626	22	15.6863	266.667	49	21.1434
8_6	Reg_8	Land_6	Caracara plancus	1	Shrubland	Omnivore	Terrestrial	15.71	0	0	0	0	0	0	19.0144	1	3.82227
8_6	Reg_8	Land_6	Caracara plancus	1	Shrubland	Omnivore	Terrestrial	15.71	0	0	0	0	0	0	19.0144	1	3.82227
8_9	Reg_8	Land_9	Caracara plancus	1	Shrubland	Omnivore	Terrestrial	39.82	235.632	6	8.04598	146.305	10	5.20362	99.2248	30	2.73256
9_11	Reg_9	Land_11	Caracara plancus	3	Shrubland	Omnivore	Terrestrial	5.02	542.274	4	44.6064	275.132	12	60.2419	219.72	31	45.7686
9_11	Reg_9	Land_11	Caracara plancus	2	Shrubland	Omnivore	Terrestrial	5.02	542.274	4	44.6064	275.132	12	60.2419	219.72	31	45.7686
9_12	Reg_9	Land_12	Caracara plancus	4	Shrubland	Omnivore	Terrestrial	38.76	232.558	8	6.97674	298.938	20	14.9469	206.83	38	32.111
9_15	Reg_9	Land_15	Caracara plancus	1	Shrubland	Omnivore	Terrestrial	162.13	11.6279	1	0.290698	56.0606	7	0.984848	79.1618	24	4.07451
9_15	Reg_9	Land_15	Caracara plancus	1	Shrubland	Omnivore	Terrestrial	162.13	11.6279	1	0.290698	56.0606	7	0.984848	79.1618	24	4.07451
1_8	Reg_1	Land_8	Cariama cristata	2	Shrubland	Invertivore	Terrestrial	138.26	0	0	0	36.4188	3	0.682853	81.5376	19	11.9006
2_2	Reg_2	Land_2	Cariama cristata	2	Shrubland	Invertivore	Terrestrial	148.14	167.63	4	3.17919	55.9335	5	1.0582	51.9884	17	1.00873
2_3	Reg_2	Land_3	Cariama cristata	2	Shrubland	Invertivore	Terrestrial	214.58	153.392	5	2.94985	92.6348	9	1.74639	47.3694	16	0.834789
8_15	Reg_8	Land_15	Cariama cristata	1	Shrubland	Invertivore	Terrestrial	20.7	34.7826	1	0.57971	92.5645	7	5.08346	118.789	23	9.53028
9_7	Reg_9	Land_7	Cariama cristata	1	Shrubland	Invertivore	Terrestrial	21.36	330.383	5	27.4336	205.011	10	44.7229	242.671	37	44.205
4_4	Reg_4	Land_4	Certhiaxis cinnamomeus	2	Wetland	Invertivore	Insessorial	63.51	360.465	7	8.13953	248.862	16	7.20789	142.026	31	5.82072
7_13	Reg_7	Land_13	Certhiaxis cinnamomeus	1	Wetland	Invertivore	Insessorial	92.4	0	0	0	9.08403	2	0.302801	91.9496	10	14.452
7_12	Reg_7	Land_12	Chloroceryle amazona	1	Riverine	Aquatic predator	Insessorial	9.26	389.535	8	11.6279	218.347	19	5.30705	144.354	33	10.9818
1_15	Reg_1	Land_15	Chlorostilbon lucidus	1	Shrubland	Nectarivore	Aerial	65.42	116.618	2	2.33236	185.941	6	13.9078	177.019	21	30.5707
10_1	Reg_10	Land_1	Chlorostilbon lucidus	1	Shrubland	Nectarivore	Aerial	27.73	34.8837	1	2.03488	63.6846	1	8.64291	77.6096	10	5.6849
4_13	Reg_4	Land_13	Chlorostilbon lucidus	1	Shrubland	Nectarivore	Aerial	48.4	58.1395	2	1.16279	121.12	5	13.4746	135.015	33	20.4074
4_13	Reg_4	Land_13	Chlorostilbon lucidus	2	Shrubland	Nectarivore	Aerial	48.4	58.1395	2	1.16279	121.12	5	13.4746	135.015	33	20.4074
12_2	Reg_12	Land_2	Chrysomus ruficapillus	45	Wetland	Granivore	Insessorial	11.23	120.69	1	23.5632	170.437	5	45.0226	114.341	11	39.4767
12_3	Reg_12	Land_3	Chrysomus ruficapillus	50	Wetland	Granivore	Insessorial	77.87	104.651	1	10.4651	154.545	5	15.9848	173.069	18	21.4203
7_2	Reg_7	Land_2	Chrysomus ruficapillus	5	Wetland	Granivore	Insessorial	13.67	34.7826	1	0.57971	106.141	2	18.2714	164.92	14	28.0365
7_6	Reg_7	Land_6	Chrysomus ruficapillus	2	Wetland	Granivore	Insessorial	12.8	11.5942	1	0.289855	91.047	7	2.12443	89.6739	21	3.04736
7_8	Reg_7	Land_8	Chrysomus ruficapillus	6	Wetland	Granivore	Insessorial	100.29	0	0	0	9.11162	1	0.15186	58.6294	12	3.12561
7_9	Reg_7	Land_9	Chrysomus ruficapillus	4	Wetland	Granivore	Insessorial	0	156.977	1	53.7791	115.064	1	31.2642	99.3596	10	20.9393
8_5	Reg_8	Land_5	Coereba flaveola	1	Shrubland	Nectarivore	Insessorial	32.39	379.31	10	8.62069	295.626	22	15.6863	266.667	49	21.1434
1_14	Reg_1	Land_14	Colaptes campestris	1	Grassland	Invertivore	Terrestrial	0	208.696	1	60	199.697	3	45.6127	140.889	3	28.1584
11_13	Reg_11	Land_13	Colaptes campestris	3	Grassland	Invertivore	Terrestrial	21.3	441.86	9	27.907	214.123	11	29.6128	116.094	22	31.5473
2_13	Reg_2	Land_13	Colaptes campestris	2	Grassland	Invertivore	Terrestrial	8	215.116	5	9.30233	139.605	8	8.5736	148.523	31	9.79782
2_2	Reg_2	Land_2	Colaptes campestris	1	Grassland	Invertivore	Terrestrial	148.14	167.63	4	3.17919	55.9335	5	1.0582	51.9884	17	1.00873
2_2	Reg_2	Land_2	Colaptes campestris	1	Grassland	Invertivore	Terrestrial	148.14	167.63	4	3.17919	55.9335	5	1.0582	51.9884	17	1.00873
4_2	Reg_4	Land_2	Colaptes campestris	1	Grassland	Invertivore	Terrestrial	51.85	0	0	0	40.8781	1	5.82892	57.42	3	11.9884
11_11	Reg_11	Land_11	Colonia colonus	1	Forest	Invertivore	Insessorial	25.65	180.233	2	28.7791	190.765	7	41.1052	119.2	11	56.7851
2_7	Reg_2	Land_7	Columba livia	1	Human Modified	Granivore	Terrestrial	43.09	87.2093	1	4.94186	192.279	8	15.8213	141.665	21	35.4745
1_3	Reg_1	Land_3	Columbina talpacoti	2	Human Modified	Granivore	Terrestrial	77.54	34.8837	1	0.581395	168.565	13	5.39104	250.049	58	13.8031
11_14	Reg_11	Land_14	Columbina talpacoti	1	Human Modified	Granivore	Terrestrial	15.88	144.928	2	15.0725	153.263	4	45.5235	105.652	6	58.7881
3_2	Reg_3	Land_2	Columbina talpacoti	1	Human Modified	Granivore	Terrestrial	7.58	387.097	7	29.3255	336.874	21	31.4871	201.048	49	41.3546
4_5	Reg_4	Land_5	Columbina talpacoti	1	Human Modified	Granivore	Terrestrial	5.02	201.149	1	40.2299	182.504	5	22.2474	165.891	32	10.1938
4_6	Reg_4	Land_6	Columbina talpacoti	1	Human Modified	Granivore	Terrestrial	3.56	470.93	8	17.1512	257.967	16	12.5948	231.277	64	12.5146
4_7	Reg_4	Land_7	Columbina talpacoti	1	Human Modified	Granivore	Terrestrial	50.83	440.58	12	8.4058	547.8	45	12.2914	264.261	70	31.9752
4_9	Reg_4	Land_9	Columbina talpacoti	1	Human Modified	Granivore	Terrestrial	45.13	127.907	3	2.03488	106.222	9	1.89681	112.922	32	2.96857
5_11	Reg_5	Land_11	Columbina talpacoti	3	Human Modified	Granivore	Terrestrial	41.57	0	0	0	51.5933	1	11.1533	76.8335	4	12.534
6_14	Reg_6	Land_14	Columbina talpacoti	1	Human Modified	Granivore	Terrestrial	146.8	0	0	0	0	0	0	11.6482	1	1.16482
9_3	Reg_9	Land_3	Columbina talpacoti	1	Human Modified	Granivore	Terrestrial	19.9	313.043	7	11.0145	218.513	9	14.7193	144.354	24	13.6205
1_7	Reg_1	Land_7	Coragyps atratus	1	Human Modified	Scavenger	Terrestrial	81	0	0	0	37.7929	3	1.43613	116.392	21	13.6566
10_14	Reg_10	Land_14	Coragyps atratus	1	Human Modified	Scavenger	Terrestrial	40.7	0	0	0	86.5604	2	17.9954	51.2522	3	26.325
11_6	Reg_11	Land_6	Coragyps atratus	7	Human Modified	Scavenger	Terrestrial	18.59	123.167	1	20.5279	245.827	3	38.3915	185.911	5	49.0006
12_1	Reg_12	Land_1	Coragyps atratus	1	Human Modified	Scavenger	Terrestrial	79.86	0	0	0	72.8929	3	6.15034	95.1272	11	12.3277
3_14	Reg_3	Land_14	Coragyps atratus	2	Human Modified	Scavenger	Terrestrial	33.76	151.163	2	10.7558	165.026	9	19.9849	160.745	32	31.9744
3_15	Reg_3	Land_15	Coragyps atratus	2	Human Modified	Scavenger	Terrestrial	25.4	23.1214	1	0.867052	83.1444	5	8.76795	183.511	33	18.3705
3_7	Reg_3	Land_7	Coragyps atratus	1	Human Modified	Scavenger	Terrestrial	46.96	186.047	5	4.06977	84.5921	6	1.96375	93.9259	16	10.033
3_8	Reg_3	Land_8	Coragyps atratus	9	Human Modified	Scavenger	Terrestrial	40.12	68.9655	2	1.14943	119.155	9	15.3846	130.233	24	36.938
3_9	Reg_3	Land_9	Coragyps atratus	2	Human Modified	Scavenger	Terrestrial	24.5	162.791	3	10.7558	221.045	12	25.9652	261.595	38	37.7062
4_7	Reg_4	Land_7	Coragyps atratus	3	Human Modified	Scavenger	Terrestrial	50.83	440.58	12	8.4058	547.8	45	12.2914	264.261	70	31.9752
4_9	Reg_4	Land_9	Coragyps atratus	6	Human Modified	Scavenger	Terrestrial	45.13	127.907	3	2.03488	106.222	9	1.89681	112.922	32	2.96857
5_1	Reg_5	Land_1	Coragyps atratus	2	Human Modified	Scavenger	Terrestrial	5.02	295.652	2	37.1014	170.953	6	24.8109	163.368	32	10.6131
5_3	Reg_5	Land_3	Coragyps atratus	2	Human Modified	Scavenger	Terrestrial	21.19	93.0233	1	1.74419	45.3172	3	0.906344	170.774	38	9.00446
5_3	Reg_5	Land_3	Coragyps atratus	1	Human Modified	Scavenger	Terrestrial	21.19	93.0233	1	1.74419	45.3172	3	0.906344	170.774	38	9.00446
5_3	Reg_5	Land_3	Coragyps atratus	1	Human Modified	Scavenger	Terrestrial	21.19	93.0233	1	1.74419	45.3172	3	0.906344	170.774	38	9.00446
5_4	Reg_5	Land_4	Coragyps atratus	1	Human Modified	Scavenger	Terrestrial	122.64	0	0	0	42.4886	5	0.834598	59.7942	20	2.29082
5_4	Reg_5	Land_4	Coragyps atratus	1	Human Modified	Scavenger	Terrestrial	122.64	0	0	0	42.4886	5	0.834598	59.7942	20	2.29082
5_4	Reg_5	Land_4	Coragyps atratus	1	Human Modified	Scavenger	Terrestrial	122.64	0	0	0	42.4886	5	0.834598	59.7942	20	2.29082
6_8	Reg_6	Land_8	Coragyps atratus	1	Human Modified	Scavenger	Terrestrial	45.47	75.5814	1	2.90698	69.4864	1	15.6344	49.2917	1	14.9622
7_7	Reg_7	Land_7	Coragyps atratus	1	Human Modified	Scavenger	Terrestrial	14.2	63.7681	1	4.92754	103.108	2	8.26384	165.697	17	22.0605
9_12	Reg_9	Land_12	Coragyps atratus	1	Human Modified	Scavenger	Terrestrial	38.76	232.558	8	6.97674	298.938	20	14.9469	206.83	38	32.111
9_13	Reg_9	Land_13	Coragyps atratus	2	Human Modified	Scavenger	Terrestrial	21.36	150.725	2	8.98551	155.825	9	17.0197	205.277	42	18.4517
9_13	Reg_9	Land_13	Coragyps atratus	1	Human Modified	Scavenger	Terrestrial	21.36	150.725	2	8.98551	155.825	9	17.0197	205.277	42	18.4517
9_13	Reg_9	Land_13	Coragyps atratus	1	Human Modified	Scavenger	Terrestrial	21.36	150.725	2	8.98551	155.825	9	17.0197	205.277	42	18.4517
9_14	Reg_9	Land_14	Coragyps atratus	1	Human Modified	Scavenger	Terrestrial	83.98	168.116	5	3.18841	157.815	15	3.56601	136.646	44	6.03649
9_5	Reg_9	Land_5	Coragyps atratus	2	Human Modified	Scavenger	Terrestrial	22.06	264.368	4	20.1149	180.995	6	23.1523	164.341	16	24.7093
9_5	Reg_9	Land_5	Coragyps atratus	2	Human Modified	Scavenger	Terrestrial	22.06	264.368	4	20.1149	180.995	6	23.1523	164.341	16	24.7093
9_6	Reg_9	Land_6	Coragyps atratus	7	Human Modified	Scavenger	Terrestrial	125.76	0	0	0	0	0	0	81.4901	11	11.0206
1_6	Reg_1	Land_6	Crotophaga ani	7	Human Modified	Omnivore	Insessorial	37.06	162.791	4	8.13953	136.26	6	16.8055	146.266	23	11.4452
10_15	Reg_10	Land_15	Crotophaga ani	3	Human Modified	Omnivore	Insessorial	23.82	0	0	0	9.07029	1	0.151172	40.7609	11	1.18401
10_15	Reg_10	Land_15	Crotophaga ani	3	Human Modified	Omnivore	Insessorial	23.82	0	0	0	9.07029	1	0.151172	40.7609	11	1.18401
8_4	Reg_8	Land_4	Cyanocorax chrysops	4	Forest	Invertivore	Insessorial	22.73	69.5652	3	1.44928	301.973	21	8.49772	326.737	73	18.6457
8_4	Reg_8	Land_4	Cyanocorax chrysops	1	Forest	Invertivore	Insessorial	22.73	69.5652	3	1.44928	301.973	21	8.49772	326.737	73	18.6457
2_11	Reg_2	Land_11	Cyanocorax cristatellus	6	Woodland	Omnivore	Insessorial	14.86	272.464	2	37.1014	207.733	6	36.0121	142.414	16	37.4854
10_2	Reg_10	Land_2	Cyanoloxia brissonii	1	Forest	Frugivore	Insessorial	38.4	169.591	2	6.14035	94.0819	3	5.38695	129.27	15	16.4208
10_2	Reg_10	Land_2	Cyanoloxia brissonii	1	Forest	Frugivore	Insessorial	38.4	169.591	2	6.14035	94.0819	3	5.38695	129.27	15	16.4208
12_5	Reg_12	Land_5	Cyanoloxia brissonii	1	Forest	Frugivore	Insessorial	79.86	0	0	0	52.9501	7	0.983359	95.0718	20	10.1669
7_12	Reg_7	Land_12	Cyanoloxia brissonii	1	Forest	Frugivore	Insessorial	9.26	389.535	8	11.6279	218.347	19	5.30705	144.354	33	10.9818
1_13	Reg_1	Land_13	Dacnis cayana	2	Forest	Frugivore	Insessorial	6.54	237.681	4	20.2899	200.303	3	25.2656	142.414	16	14.8816
2_6	Reg_2	Land_6	Dacnis cayana	1	Forest	Frugivore	Insessorial	16.2	180.233	3	32.2674	168.437	4	47.5721	139.002	13	57.0957
5_1	Reg_5	Land_1	Dacnis cayana	1	Forest	Frugivore	Insessorial	5.02	295.652	2	37.1014	170.953	6	24.8109	163.368	32	10.6131
7_7	Reg_7	Land_7	Dacnis cayana	1	Forest	Frugivore	Insessorial	14.2	63.7681	1	4.92754	103.108	2	8.26384	165.697	17	22.0605
8_10	Reg_8	Land_10	Dacnis cayana	1	Forest	Frugivore	Insessorial	30.21	175.953	3	3.22581	197.269	15	8.27011	229.381	61	18.1254
8_12	Reg_8	Land_12	Dendrocygna autumnalis	6	Wetland	Herbivore terrestrial	Terrestrial	231.57	0	0	0	0	0	0	15.1427	5	0.388274
6_14	Reg_6	Land_14	Dendrocygna viduata	2	Wetland	Herbivore aquatic	Aquatic	146.8	0	0	0	0	0	0	11.6482	1	1.16482
6_14	Reg_6	Land_14	Dendrocygna viduata	1	Wetland	Herbivore aquatic	Aquatic	146.8	0	0	0	0	0	0	11.6482	1	1.16482
1_7	Reg_1	Land_7	Egretta thula	1	Wetland	Aquatic predator	Terrestrial	81	0	0	0	37.7929	3	1.43613	116.392	21	13.6566
4_2	Reg_4	Land_2	Egretta thula	1	Wetland	Aquatic predator	Terrestrial	51.85	0	0	0	40.8781	1	5.82892	57.42	3	11.9884
4_3	Reg_4	Land_3	Egretta thula	1	Wetland	Aquatic predator	Terrestrial	77.02	0	0	0	62.1212	3	4.84848	73.7291	2	23.1665
5_4	Reg_5	Land_4	Egretta thula	1	Wetland	Aquatic predator	Terrestrial	122.64	0	0	0	42.4886	5	0.834598	59.7942	20	2.29082
12_2	Reg_12	Land_2	Elaenia flavogaster	1	Woodland	Invertivore	Insessorial	11.23	120.69	1	23.5632	170.437	5	45.0226	114.341	11	39.4767
12_8	Reg_12	Land_8	Elaenia flavogaster	1	Woodland	Invertivore	Insessorial	18.1	141.593	1	23.3038	136.674	2	13.2118	92.7975	8	11.7841
4_6	Reg_4	Land_6	Elaenia flavogaster	1	Woodland	Invertivore	Insessorial	3.56	470.93	8	17.1512	257.967	16	12.5948	231.277	64	12.5146
5_1	Reg_5	Land_1	Elaenia flavogaster	1	Woodland	Invertivore	Insessorial	5.02	295.652	2	37.1014	170.953	6	24.8109	163.368	32	10.6131
5_1	Reg_5	Land_1	Elaenia flavogaster	1	Woodland	Invertivore	Insessorial	5.02	295.652	2	37.1014	170.953	6	24.8109	163.368	32	10.6131
5_1	Reg_5	Land_1	Elaenia flavogaster	1	Woodland	Invertivore	Insessorial	5.02	295.652	2	37.1014	170.953	6	24.8109	163.368	32	10.6131
1_7	Reg_1	Land_7	Eupetomena macroura	1	Shrubland	Nectarivore	Aerial	81	0	0	0	37.7929	3	1.43613	116.392	21	13.6566
2_7	Reg_2	Land_7	Eupetomena macroura	1	Shrubland	Nectarivore	Aerial	43.09	87.2093	1	4.94186	192.279	8	15.8213	141.665	21	35.4745
5_1	Reg_5	Land_1	Eupetomena macroura	1	Shrubland	Nectarivore	Aerial	5.02	295.652	2	37.1014	170.953	6	24.8109	163.368	32	10.6131
5_10	Reg_5	Land_10	Eupetomena macroura	1	Shrubland	Nectarivore	Aerial	5.02	162.791	1	64.8256	181.681	1	51.9304	172.715	8	47.1764
8_5	Reg_8	Land_5	Euphonia chlorotica	4	Forest	Frugivore	Insessorial	32.39	379.31	10	8.62069	295.626	22	15.6863	266.667	49	21.1434
10_10	Reg_10	Land_10	Eupsittula aurea	2	Grassland	Omnivore	Insessorial	54.57	0	0	0	48.2655	1	4.0724	43.0233	1	7.5
10_10	Reg_10	Land_10	Eupsittula aurea	2	Grassland	Omnivore	Insessorial	54.57	0	0	0	48.2655	1	4.0724	43.0233	1	7.5
10_13	Reg_10	Land_13	Eupsittula aurea	2	Grassland	Omnivore	Insessorial	20.7	128.28	3	3.49854	103.265	9	2.58162	63.2887	22	1.57251
10_4	Reg_10	Land_4	Eupsittula aurea	1	Grassland	Omnivore	Insessorial	191.52	69.7674	3	1.16279	66.7678	5	1.28983	82.0373	30	1.74961
10_4	Reg_10	Land_4	Eupsittula aurea	8	Grassland	Omnivore	Insessorial	191.52	69.7674	3	1.16279	66.7678	5	1.28983	82.0373	30	1.74961
11_12	Reg_11	Land_12	Eupsittula aurea	2	Grassland	Omnivore	Insessorial	27.13	139.13	2	3.76812	149.773	10	4.84115	121.459	21	22.5262
11_14	Reg_11	Land_14	Eupsittula aurea	2	Grassland	Omnivore	Insessorial	15.88	144.928	2	15.0725	153.263	4	45.5235	105.652	6	58.7881
11_15	Reg_11	Land_15	Eupsittula aurea	1	Grassland	Omnivore	Insessorial	0	191.86	2	46.2209	109.091	4	42.3485	77.6096	8	30.8498
11_15	Reg_11	Land_15	Eupsittula aurea	2	Grassland	Omnivore	Insessorial	0	191.86	2	46.2209	109.091	4	42.3485	77.6096	8	30.8498
11_3	Reg_11	Land_3	Eupsittula aurea	2	Grassland	Omnivore	Insessorial	63.23	140.351	2	3.21637	151.745	5	15.3263	95.4969	14	14.771
11_4	Reg_11	Land_4	Eupsittula aurea	2	Grassland	Omnivore	Insessorial	66.35	289.855	8	4.92754	204.701	13	13.95	123.399	22	36.5541
12_14	Reg_12	Land_14	Eupsittula aurea	2	Grassland	Omnivore	Insessorial	73.11	75.5814	3	2.03488	142.316	12	4.46631	143.606	30	16.7863
12_4	Reg_12	Land_4	Eupsittula aurea	4	Grassland	Omnivore	Insessorial	55.94	57.971	2	1.15942	170.953	8	14.2209	149.486	20	20.2097
4_14	Reg_4	Land_14	Eupsittula aurea	1	Grassland	Omnivore	Insessorial	85.3	162.319	5	2.89855	183.612	17	3.64188	183.618	43	11.6848
4_14	Reg_4	Land_14	Eupsittula aurea	1	Grassland	Omnivore	Insessorial	85.3	162.319	5	2.89855	183.612	17	3.64188	183.618	43	11.6848
4_15	Reg_4	Land_15	Eupsittula aurea	1	Grassland	Omnivore	Insessorial	30.54	201.149	4	4.02299	171.946	11	3.84615	123.256	27	3.93411
4_15	Reg_4	Land_15	Eupsittula aurea	1	Grassland	Omnivore	Insessorial	30.54	201.149	4	4.02299	171.946	11	3.84615	123.256	27	3.93411
5_2	Reg_5	Land_2	Eupsittula aurea	2	Grassland	Omnivore	Insessorial	46.16	169.096	4	3.79009	267.274	20	12.5285	270.627	47	21.2192
6_1	Reg_6	Land_1	Eupsittula aurea	4	Grassland	Omnivore	Insessorial	24.24	275.862	8	5.17241	140.271	14	2.71493	143.023	36	16.4341
6_10	Reg_6	Land_10	Eupsittula aurea	2	Grassland	Omnivore	Insessorial	200.37	0	0	0	0	0	0	0.776548	1	0.0194137
6_3	Reg_6	Land_3	Eupsittula aurea	2	Grassland	Omnivore	Insessorial	29.15	180.233	2	20.9302	118.361	4	32.8528	105.549	18	41.754
6_8	Reg_6	Land_8	Eupsittula aurea	2	Grassland	Omnivore	Insessorial	45.47	75.5814	1	2.90698	69.4864	1	15.6344	49.2917	1	14.9622
6_8	Reg_6	Land_8	Eupsittula aurea	2	Grassland	Omnivore	Insessorial	45.47	75.5814	1	2.90698	69.4864	1	15.6344	49.2917	1	14.9622
6_8	Reg_6	Land_8	Eupsittula aurea	2	Grassland	Omnivore	Insessorial	45.47	75.5814	1	2.90698	69.4864	1	15.6344	49.2917	1	14.9622
6_9	Reg_6	Land_9	Eupsittula aurea	4	Grassland	Omnivore	Insessorial	28.63	0	0	0	0	0	0	0	0	0
6_9	Reg_6	Land_9	Eupsittula aurea	2	Grassland	Omnivore	Insessorial	28.63	0	0	0	0	0	0	0	0	0
7_1	Reg_7	Land_1	Eupsittula aurea	15	Grassland	Omnivore	Insessorial	94.35	11.5942	1	0.289855	95.5994	10	1.59332	129.658	32	5.2795
7_1	Reg_7	Land_1	Eupsittula aurea	5	Grassland	Omnivore	Insessorial	94.35	11.5942	1	0.289855	95.5994	10	1.59332	129.658	32	5.2795
8_13	Reg_8	Land_13	Eupsittula aurea	3	Grassland	Omnivore	Insessorial	209.91	0	0	0	0	0	0	6.98758	2	0.15528
8_2	Reg_8	Land_2	Eupsittula aurea	1	Grassland	Omnivore	Insessorial	509.54	0	0	0	0	0	0	0	0	0
8_2	Reg_8	Land_2	Eupsittula aurea	8	Grassland	Omnivore	Insessorial	509.54	0	0	0	0	0	0	0	0	0
9_12	Reg_9	Land_12	Eupsittula aurea	2	Grassland	Omnivore	Insessorial	38.76	232.558	8	6.97674	298.938	20	14.9469	206.83	38	32.111
9_4	Reg_9	Land_4	Eupsittula aurea	4	Grassland	Omnivore	Insessorial	73.56	0	0	0	60.4686	2	5.51776	130.747	18	13.9864
9_15	Reg_9	Land_15	Falco sparverius	2	Grassland	Omnivore	Insessorial	162.13	11.6279	1	0.290698	56.0606	7	0.984848	79.1618	24	4.07451
1_9	Reg_1	Land_9	Fluvicola nengeta	1	Wetland	Invertivore	Terrestrial	13.66	226.087	3	21.4493	201.21	3	34.8714	144.05	19	30.6737
7_13	Reg_7	Land_13	Fluvicola nengeta	1	Wetland	Invertivore	Terrestrial	92.4	0	0	0	9.08403	2	0.302801	91.9496	10	14.452
8_15	Reg_8	Land_15	Fluvicola nengeta	1	Wetland	Invertivore	Terrestrial	20.7	34.7826	1	0.57971	92.5645	7	5.08346	118.789	23	9.53028
8_3	Reg_8	Land_3	Fluvicola nengeta	1	Wetland	Invertivore	Terrestrial	19.64	244.186	7	4.36047	490.509	35	10.9339	297.03	77	11.0464
4_13	Reg_4	Land_13	Forpus xanthopterygius	3	Forest	Omnivore	Insessorial	48.4	58.1395	2	1.16279	121.12	5	13.4746	135.015	33	20.4074
4_7	Reg_4	Land_7	Forpus xanthopterygius	6	Forest	Omnivore	Insessorial	50.83	440.58	12	8.4058	547.8	45	12.2914	264.261	70	31.9752
2_10	Reg_2	Land_10	Furnarius rufus	1	Shrubland	Invertivore	Terrestrial	103.7	0	0	0	9.1047	1	0.151745	16.6925	2	1.90217
10_15	Reg_10	Land_15	Galbula ruficauda	1	Forest	Invertivore	Insessorial	23.82	0	0	0	9.07029	1	0.151172	40.7609	11	1.18401
7_15	Reg_7	Land_15	Gallinula galeata	3	Wetland	Omnivore	Terrestrial	17.1	171.091	1	30.3835	136.674	1	27.0311	79.5962	1	13.8808
12_7	Reg_12	Land_7	Geranoaetus albicaudatus	1	Grassland	Vertivore	Generalist	0	0	0	0	3.02343	1	0.0755858	65.5674	10	6.61494
3_12	Reg_3	Land_12	Geranoaetus albicaudatus	1	Grassland	Vertivore	Generalist	22.46	98.5507	1	7.82609	169.954	5	27.8452	190.92	28	41.7734
3_13	Reg_3	Land_13	Geranoaetus albicaudatus	1	Grassland	Vertivore	Generalist	15.88	127.536	2	4.92754	182.094	13	4.77997	199.457	49	22.3128
9_13	Reg_9	Land_13	Geranoaetus albicaudatus	1	Grassland	Vertivore	Generalist	21.36	150.725	2	8.98551	155.825	9	17.0197	205.277	42	18.4517
4_10	Reg_4	Land_10	Guira guira	1	Human Modified	Invertivore	Terrestrial	11.56	532.164	9	15.2047	251.897	21	5.84219	133.929	38	3.26087
8_12	Reg_8	Land_12	Himantopus himantopus	2	Wetland	Aquatic predator	Terrestrial	231.57	0	0	0	0	0	0	15.1427	5	0.388274
8_13	Reg_8	Land_13	Himantopus himantopus	1	Wetland	Aquatic predator	Terrestrial	209.91	0	0	0	0	0	0	6.98758	2	0.15528
12_8	Reg_12	Land_8	Hirundinea ferruginea	2	Rock	Invertivore	Insessorial	18.1	141.593	1	23.3038	136.674	2	13.2118	92.7975	8	11.7841
3_6	Reg_3	Land_6	Hirundinea ferruginea	1	Rock	Invertivore	Insessorial	71.91	93.0233	3	1.45349	90.8403	9	5.45042	129.195	27	15.3637
6_14	Reg_6	Land_14	Hirundo rustica	14	Human Modified	Invertivore	Aerial	146.8	0	0	0	0	0	0	11.6482	1	1.16482
6_15	Reg_6	Land_15	Hirundo rustica	2	Human Modified	Invertivore	Aerial	188.9	0	0	0	0	0	0	3.10559	1	0.11646
6_15	Reg_6	Land_15	Hirundo rustica	1	Human Modified	Invertivore	Aerial	188.9	0	0	0	0	0	0	3.10559	1	0.11646
7_10	Reg_7	Land_10	Jacana jacana	1	Wetland	Omnivore	Terrestrial	197.99	0	0	0	0	0	0	8.15376	4	0.174723
7_11	Reg_7	Land_11	Jacana jacana	2	Wetland	Omnivore	Terrestrial	45.42	92.7536	2	2.31884	81.8802	6	2.12282	52.3865	16	1.41638
4_3	Reg_4	Land_3	Knipolegus lophotes	1	Shrubland	Invertivore	Insessorial	77.02	0	0	0	62.1212	3	4.84848	73.7291	2	23.1665
7_1	Reg_7	Land_1	Leistes superciliaris	1	Grassland	Invertivore	Terrestrial	94.35	11.5942	1	0.289855	95.5994	10	1.59332	129.658	32	5.2795
5_10	Reg_5	Land_10	Lepidocolaptes angustirostris	1	Woodland	Invertivore	Insessorial	5.02	162.791	1	64.8256	181.681	1	51.9304	172.715	8	47.1764
12_8	Reg_12	Land_8	Machetornis rixosa	1	Grassland	Invertivore	Terrestrial	18.1	141.593	1	23.3038	136.674	2	13.2118	92.7975	8	11.7841
4_13	Reg_4	Land_13	Machetornis rixosa	1	Grassland	Invertivore	Terrestrial	48.4	58.1395	2	1.16279	121.12	5	13.4746	135.015	33	20.4074
4_5	Reg_4	Land_5	Machetornis rixosa	1	Grassland	Invertivore	Terrestrial	5.02	201.149	1	40.2299	182.504	5	22.2474	165.891	32	10.1938
6_1	Reg_6	Land_1	Megaceryle torquata	1	Riverine	Aquatic predator	Insessorial	24.24	275.862	8	5.17241	140.271	14	2.71493	143.023	36	16.4341
7_10	Reg_7	Land_10	Megaceryle torquata	1	Riverine	Aquatic predator	Insessorial	197.99	0	0	0	0	0	0	8.15376	4	0.174723
10_1	Reg_10	Land_1	Melanerpes candidus	1	Grassland	Frugivore	Insessorial	27.73	34.8837	1	2.03488	63.6846	1	8.64291	77.6096	10	5.6849
3_9	Reg_3	Land_9	Mesembrinibis cayennensis	1	Forest	Aquatic predator	Terrestrial	24.5	162.791	3	10.7558	221.045	12	25.9652	261.595	38	37.7062
8_15	Reg_8	Land_15	Mesembrinibis cayennensis	2	Forest	Aquatic predator	Terrestrial	20.7	34.7826	1	0.57971	92.5645	7	5.08346	118.789	23	9.53028
8_4	Reg_8	Land_4	Mesembrinibis cayennensis	4	Forest	Aquatic predator	Terrestrial	22.73	69.5652	3	1.44928	301.973	21	8.49772	326.737	73	18.6457
8_5	Reg_8	Land_5	Mesembrinibis cayennensis	8	Forest	Aquatic predator	Terrestrial	32.39	379.31	10	8.62069	295.626	22	15.6863	266.667	49	21.1434
12_10	Reg_12	Land_10	Milvago chimachima	2	Grassland	Omnivore	Terrestrial	11.11	211.144	3	24.6334	168.437	6	43.5508	132.35	21	50.8442
4_11	Reg_4	Land_11	Milvago chimachima	2	Grassland	Omnivore	Terrestrial	119.04	0	0	0	0	0	0	40.7371	6	9.35015
4_14	Reg_4	Land_14	Milvago chimachima	1	Grassland	Omnivore	Terrestrial	85.3	162.319	5	2.89855	183.612	17	3.64188	183.618	43	11.6848
7_7	Reg_7	Land_7	Milvago chimachima	1	Grassland	Omnivore	Terrestrial	14.2	63.7681	1	4.92754	103.108	2	8.26384	165.697	17	22.0605
5_8	Reg_5	Land_8	Mimus saturninus	3	Shrubland	Omnivore	Terrestrial	62.11	246.334	2	8.5044	229.135	12	6.9044	252.28	44	14.2829
5_8	Reg_5	Land_8	Mimus saturninus	1	Shrubland	Omnivore	Terrestrial	62.11	246.334	2	8.5044	229.135	12	6.9044	252.28	44	14.2829
9_3	Reg_9	Land_3	Mimus saturninus	1	Shrubland	Omnivore	Terrestrial	19.9	313.043	7	11.0145	218.513	9	14.7193	144.354	24	13.6205
2_13	Reg_2	Land_13	Molothrus bonariensis	2	Woodland	Invertivore	Terrestrial	8	215.116	5	9.30233	139.605	8	8.5736	148.523	31	9.79782
2_14	Reg_2	Land_14	Molothrus bonariensis	4	Woodland	Invertivore	Terrestrial	9.4	162.791	1	18.314	127.466	3	11.6085	103.421	13	10.9448
3_11	Reg_3	Land_11	Molothrus bonariensis	1	Woodland	Invertivore	Terrestrial	28.69	275.66	2	27.2727	201.821	4	34.9014	176.984	15	45.5657
4_9	Reg_4	Land_9	Molothrus bonariensis	2	Woodland	Invertivore	Terrestrial	45.13	127.907	3	2.03488	106.222	9	1.89681	112.922	32	2.96857
8_15	Reg_8	Land_15	Molothrus bonariensis	3	Woodland	Invertivore	Terrestrial	20.7	34.7826	1	0.57971	92.5645	7	5.08346	118.789	23	9.53028
8_3	Reg_8	Land_3	Molothrus bonariensis	1	Woodland	Invertivore	Terrestrial	19.64	244.186	7	4.36047	490.509	35	10.9339	297.03	77	11.0464
8_3	Reg_8	Land_3	Molothrus bonariensis	1	Woodland	Invertivore	Terrestrial	19.64	244.186	7	4.36047	490.509	35	10.9339	297.03	77	11.0464
8_3	Reg_8	Land_3	Molothrus bonariensis	4	Woodland	Invertivore	Terrestrial	19.64	244.186	7	4.36047	490.509	35	10.9339	297.03	77	11.0464
5_7	Reg_5	Land_7	Myiothlypis flaveola	1	Woodland	Invertivore	Generalist	0	34.8837	1	0.581395	69.8027	5	1.44158	97.4568	26	6.05708
11_12	Reg_11	Land_12	Myiozetetes similis	1	Shrubland	Invertivore	Insessorial	27.13	139.13	2	3.76812	149.773	10	4.84115	121.459	21	22.5262
12_6	Reg_12	Land_6	Myiozetetes similis	2	Shrubland	Invertivore	Insessorial	0	52.3256	2	0.872093	74.4115	6	3.49279	114.153	16	16.3658
7_12	Reg_7	Land_12	Nannopterum brasilianus	1	Wetland	Aquatic predator	Generalist	9.26	389.535	8	11.6279	218.347	19	5.30705	144.354	33	10.9818
5_1	Reg_5	Land_1	Nemosia pileata	1	Forest	Invertivore	Insessorial	5.02	295.652	2	37.1014	170.953	6	24.8109	163.368	32	10.6131
5_7	Reg_5	Land_7	Nemosia pileata	1	Forest	Invertivore	Insessorial	0	34.8837	1	0.581395	69.8027	5	1.44158	97.4568	26	6.05708
6_2	Reg_6	Land_2	Nemosia pileata	1	Forest	Invertivore	Insessorial	8.09	133.721	1	14.8256	150.342	5	26.6515	127.742	28	31.0037
9_8	Reg_9	Land_8	Nemosia pileata	8	Forest	Invertivore	Insessorial	25.41	249.275	4	18.5507	247.344	7	56.9803	156.535	18	73.4512
7_15	Reg_7	Land_15	Pandion haliaetus	1	Marine	Aquatic predator	Aerial	17.1	171.091	1	30.3835	136.674	1	27.0311	79.5962	1	13.8808
1_1	Reg_1	Land_1	Patagioenas picazuro	2	Forest	Omnivore	Generalist	39.04	703.812	17	13.1965	497.724	42	11.7602	379.585	102	16.437
1_10	Reg_1	Land_10	Patagioenas picazuro	2	Forest	Omnivore	Generalist	5.02	156.522	1	8.4058	159.332	11	4.24886	173.525	38	10.0932
1_10	Reg_1	Land_10	Patagioenas picazuro	1	Forest	Omnivore	Generalist	5.02	156.522	1	8.4058	159.332	11	4.24886	173.525	38	10.0932
1_10	Reg_1	Land_10	Patagioenas picazuro	1	Forest	Omnivore	Generalist	5.02	156.522	1	8.4058	159.332	11	4.24886	173.525	38	10.0932
1_13	Reg_1	Land_13	Patagioenas picazuro	1	Forest	Omnivore	Generalist	6.54	237.681	4	20.2899	200.303	3	25.2656	142.414	16	14.8816
1_13	Reg_1	Land_13	Patagioenas picazuro	1	Forest	Omnivore	Generalist	6.54	237.681	4	20.2899	200.303	3	25.2656	142.414	16	14.8816
1_14	Reg_1	Land_14	Patagioenas picazuro	1	Forest	Omnivore	Generalist	0	208.696	1	60	199.697	3	45.6127	140.889	3	28.1584
1_15	Reg_1	Land_15	Patagioenas picazuro	2	Forest	Omnivore	Generalist	65.42	116.618	2	2.33236	185.941	6	13.9078	177.019	21	30.5707
1_2	Reg_1	Land_2	Patagioenas picazuro	4	Forest	Omnivore	Generalist	39.04	273.256	9	5.52326	238.421	18	5.08732	229.858	68	6.77538
1_3	Reg_1	Land_3	Patagioenas picazuro	3	Forest	Omnivore	Generalist	77.54	34.8837	1	0.581395	168.565	13	5.39104	250.049	58	13.8031
1_3	Reg_1	Land_3	Patagioenas picazuro	4	Forest	Omnivore	Generalist	77.54	34.8837	1	0.581395	168.565	13	5.39104	250.049	58	13.8031
1_4	Reg_1	Land_4	Patagioenas picazuro	1	Forest	Omnivore	Generalist	84.34	23.2558	1	0.581395	113.809	8	6.60091	90.4679	19	15.4145
1_4	Reg_1	Land_4	Patagioenas picazuro	3	Forest	Omnivore	Generalist	84.34	23.2558	1	0.581395	113.809	8	6.60091	90.4679	19	15.4145
1_5	Reg_1	Land_5	Patagioenas picazuro	2	Forest	Omnivore	Generalist	9.52	430.233	8	23.5465	429.439	15	21.6237	268.402	38	20.1398
1_5	Reg_1	Land_5	Patagioenas picazuro	1	Forest	Omnivore	Generalist	9.52	430.233	8	23.5465	429.439	15	21.6237	268.402	38	20.1398
1_5	Reg_1	Land_5	Patagioenas picazuro	2	Forest	Omnivore	Generalist	9.52	430.233	8	23.5465	429.439	15	21.6237	268.402	38	20.1398
1_7	Reg_1	Land_7	Patagioenas picazuro	1	Forest	Omnivore	Generalist	81	0	0	0	37.7929	3	1.43613	116.392	21	13.6566
1_7	Reg_1	Land_7	Patagioenas picazuro	2	Forest	Omnivore	Generalist	81	0	0	0	37.7929	3	1.43613	116.392	21	13.6566
1_8	Reg_1	Land_8	Patagioenas picazuro	4	Forest	Omnivore	Generalist	138.26	0	0	0	36.4188	3	0.682853	81.5376	19	11.9006
10_1	Reg_10	Land_1	Patagioenas picazuro	1	Forest	Omnivore	Generalist	27.73	34.8837	1	2.03488	63.6846	1	8.64291	77.6096	10	5.6849
10_11	Reg_10	Land_11	Patagioenas picazuro	5	Forest	Omnivore	Generalist	172.57	69.5652	1	2.02899	39.3343	3	0.907716	31.0438	8	1.22235
10_3	Reg_10	Land_3	Patagioenas picazuro	1	Forest	Omnivore	Generalist	168.2	181.287	4	3.80117	104.704	10	1.97269	99.7671	24	3.5132
10_7	Reg_10	Land_7	Patagioenas picazuro	1	Forest	Omnivore	Generalist	95.6	0	0	0	0	0	0	43.4698	2	5.95769
10_8	Reg_10	Land_8	Patagioenas picazuro	2	Forest	Omnivore	Generalist	17.47	191.86	1	30.814	131.918	1	31.3116	59.7594	1	17.5398
11_10	Reg_11	Land_10	Patagioenas picazuro	2	Forest	Omnivore	Generalist	26.95	279.883	3	19.8251	129.081	3	27.8664	115.706	12	41.0212
11_10	Reg_11	Land_10	Patagioenas picazuro	1	Forest	Omnivore	Generalist	26.95	279.883	3	19.8251	129.081	3	27.8664	115.706	12	41.0212
11_13	Reg_11	Land_13	Patagioenas picazuro	1	Forest	Omnivore	Generalist	21.3	441.86	9	27.907	214.123	11	29.6128	116.094	22	31.5473
11_2	Reg_11	Land_2	Patagioenas picazuro	1	Forest	Omnivore	Generalist	28.76	98.8372	1	8.72093	68.3371	1	27.4108	128.519	15	23.9371
11_3	Reg_11	Land_3	Patagioenas picazuro	4	Forest	Omnivore	Generalist	63.23	140.351	2	3.21637	151.745	5	15.3263	95.4969	14	14.771
11_4	Reg_11	Land_4	Patagioenas picazuro	3	Forest	Omnivore	Generalist	66.35	289.855	8	4.92754	204.701	13	13.95	123.399	22	36.5541
11_8	Reg_11	Land_8	Patagioenas picazuro	2	Forest	Omnivore	Generalist	24.3	151.163	3	8.13953	220.03	12	10.6222	150.563	14	17.9278
11_9	Reg_11	Land_9	Patagioenas picazuro	2	Forest	Omnivore	Generalist	9.66	0	0	0	61.9803	5	1.88964	103.201	24	3.23957
12_1	Reg_12	Land_1	Patagioenas picazuro	1	Forest	Omnivore	Generalist	79.86	0	0	0	72.8929	3	6.15034	95.1272	11	12.3277
12_10	Reg_12	Land_10	Patagioenas picazuro	1	Forest	Omnivore	Generalist	11.11	211.144	3	24.6334	168.437	6	43.5508	132.35	21	50.8442
12_11	Reg_12	Land_11	Patagioenas picazuro	1	Forest	Omnivore	Generalist	20.7	209.302	2	29.9419	143.505	6	35.7251	128.857	23	27.6732
12_8	Reg_12	Land_8	Patagioenas picazuro	4	Forest	Omnivore	Generalist	18.1	141.593	1	23.3038	136.674	2	13.2118	92.7975	8	11.7841
12_9	Reg_12	Land_9	Patagioenas picazuro	1	Forest	Omnivore	Generalist	48.48	109.195	3	2.01149	177.979	12	12.8959	142.248	26	27.7519
12_9	Reg_12	Land_9	Patagioenas picazuro	1	Forest	Omnivore	Generalist	48.48	109.195	3	2.01149	177.979	12	12.8959	142.248	26	27.7519
2_1	Reg_2	Land_1	Patagioenas picazuro	2	Forest	Omnivore	Generalist	65.41	0	0	0	51.5933	4	0.91047	32.596	11	0.582072
2_1	Reg_2	Land_1	Patagioenas picazuro	1	Forest	Omnivore	Generalist	65.41	0	0	0	51.5933	4	0.91047	32.596	11	0.582072
2_10	Reg_2	Land_10	Patagioenas picazuro	6	Forest	Omnivore	Generalist	103.7	0	0	0	9.1047	1	0.151745	16.6925	2	1.90217
2_10	Reg_2	Land_10	Patagioenas picazuro	3	Forest	Omnivore	Generalist	103.7	0	0	0	9.1047	1	0.151745	16.6925	2	1.90217
2_12	Reg_2	Land_12	Patagioenas picazuro	3	Forest	Omnivore	Generalist	35.77	197.101	5	12.4638	261.725	14	17.3222	222.093	49	11.2017
2_12	Reg_2	Land_12	Patagioenas picazuro	1	Forest	Omnivore	Generalist	35.77	197.101	5	12.4638	261.725	14	17.3222	222.093	49	11.2017
2_12	Reg_2	Land_12	Patagioenas picazuro	8	Forest	Omnivore	Generalist	35.77	197.101	5	12.4638	261.725	14	17.3222	222.093	49	11.2017
2_13	Reg_2	Land_13	Patagioenas picazuro	2	Forest	Omnivore	Generalist	8	215.116	5	9.30233	139.605	8	8.5736	148.523	31	9.79782
2_2	Reg_2	Land_2	Patagioenas picazuro	1	Forest	Omnivore	Generalist	148.14	167.63	4	3.17919	55.9335	5	1.0582	51.9884	17	1.00873
2_2	Reg_2	Land_2	Patagioenas picazuro	3	Forest	Omnivore	Generalist	148.14	167.63	4	3.17919	55.9335	5	1.0582	51.9884	17	1.00873
2_3	Reg_2	Land_3	Patagioenas picazuro	1	Forest	Omnivore	Generalist	214.58	153.392	5	2.94985	92.6348	9	1.74639	47.3694	16	0.834789
2_4	Reg_2	Land_4	Patagioenas picazuro	2	Forest	Omnivore	Generalist	211.22	0	0	0	4.55235	1	0.0758725	43.0901	14	0.834627
2_4	Reg_2	Land_4	Patagioenas picazuro	1	Forest	Omnivore	Generalist	211.22	0	0	0	4.55235	1	0.0758725	43.0901	14	0.834627
2_5	Reg_2	Land_5	Patagioenas picazuro	2	Forest	Omnivore	Generalist	0	0	0	0	19.7269	2	0.531108	92.7795	23	5.2795
2_9	Reg_2	Land_9	Patagioenas picazuro	8	Forest	Omnivore	Generalist	10.4	226.744	1	33.7209	112.291	1	39.302	101.669	11	43.5972
3_12	Reg_3	Land_12	Patagioenas picazuro	2	Forest	Omnivore	Generalist	22.46	98.5507	1	7.82609	169.954	5	27.8452	190.92	28	41.7734
3_12	Reg_3	Land_12	Patagioenas picazuro	2	Forest	Omnivore	Generalist	22.46	98.5507	1	7.82609	169.954	5	27.8452	190.92	28	41.7734
3_13	Reg_3	Land_13	Patagioenas picazuro	2	Forest	Omnivore	Generalist	15.88	127.536	2	4.92754	182.094	13	4.77997	199.457	49	22.3128
3_4	Reg_3	Land_4	Patagioenas picazuro	1	Forest	Omnivore	Generalist	23.1	306.785	9	6.78466	382.688	33	7.66894	201.514	38	57.3675
3_4	Reg_3	Land_4	Patagioenas picazuro	1	Forest	Omnivore	Generalist	23.1	306.785	9	6.78466	382.688	33	7.66894	201.514	38	57.3675
4_1	Reg_4	Land_1	Patagioenas picazuro	2	Forest	Omnivore	Generalist	11.11	115.942	1	15.3623	107.739	2	23.4446	109.147	2	30.6079
4_1	Reg_4	Land_1	Patagioenas picazuro	2	Forest	Omnivore	Generalist	11.11	115.942	1	15.3623	107.739	2	23.4446	109.147	2	30.6079
4_10	Reg_4	Land_10	Patagioenas picazuro	1	Forest	Omnivore	Generalist	11.56	532.164	9	15.2047	251.897	21	5.84219	133.929	38	3.26087
4_10	Reg_4	Land_10	Patagioenas picazuro	1	Forest	Omnivore	Generalist	11.56	532.164	9	15.2047	251.897	21	5.84219	133.929	38	3.26087
4_10	Reg_4	Land_10	Patagioenas picazuro	1	Forest	Omnivore	Generalist	11.56	532.164	9	15.2047	251.897	21	5.84219	133.929	38	3.26087
4_10	Reg_4	Land_10	Patagioenas picazuro	2	Forest	Omnivore	Generalist	11.56	532.164	9	15.2047	251.897	21	5.84219	133.929	38	3.26087
4_10	Reg_4	Land_10	Patagioenas picazuro	1	Forest	Omnivore	Generalist	11.56	532.164	9	15.2047	251.897	21	5.84219	133.929	38	3.26087
4_11	Reg_4	Land_11	Patagioenas picazuro	1	Forest	Omnivore	Generalist	119.04	0	0	0	0	0	0	40.7371	6	9.35015
4_14	Reg_4	Land_14	Patagioenas picazuro	2	Forest	Omnivore	Generalist	85.3	162.319	5	2.89855	183.612	17	3.64188	183.618	43	11.6848
4_14	Reg_4	Land_14	Patagioenas picazuro	2	Forest	Omnivore	Generalist	85.3	162.319	5	2.89855	183.612	17	3.64188	183.618	43	11.6848
4_15	Reg_4	Land_15	Patagioenas picazuro	1	Forest	Omnivore	Generalist	30.54	201.149	4	4.02299	171.946	11	3.84615	123.256	27	3.93411
4_15	Reg_4	Land_15	Patagioenas picazuro	1	Forest	Omnivore	Generalist	30.54	201.149	4	4.02299	171.946	11	3.84615	123.256	27	3.93411
4_15	Reg_4	Land_15	Patagioenas picazuro	1	Forest	Omnivore	Generalist	30.54	201.149	4	4.02299	171.946	11	3.84615	123.256	27	3.93411
4_2	Reg_4	Land_2	Patagioenas picazuro	1	Forest	Omnivore	Generalist	51.85	0	0	0	40.8781	1	5.82892	57.42	3	11.9884
4_3	Reg_4	Land_3	Patagioenas picazuro	1	Forest	Omnivore	Generalist	77.02	0	0	0	62.1212	3	4.84848	73.7291	2	23.1665
4_3	Reg_4	Land_3	Patagioenas picazuro	2	Forest	Omnivore	Generalist	77.02	0	0	0	62.1212	3	4.84848	73.7291	2	23.1665
4_4	Reg_4	Land_4	Patagioenas picazuro	1	Forest	Omnivore	Generalist	63.51	360.465	7	8.13953	248.862	16	7.20789	142.026	31	5.82072
4_8	Reg_4	Land_8	Patagioenas picazuro	1	Forest	Omnivore	Generalist	65.28	127.907	3	2.90698	146.97	17	2.87879	201.009	39	20.0233
5_1	Reg_5	Land_1	Patagioenas picazuro	1	Forest	Omnivore	Generalist	5.02	295.652	2	37.1014	170.953	6	24.8109	163.368	32	10.6131
5_10	Reg_5	Land_10	Patagioenas picazuro	1	Forest	Omnivore	Generalist	5.02	162.791	1	64.8256	181.681	1	51.9304	172.715	8	47.1764
5_11	Reg_5	Land_11	Patagioenas picazuro	1	Forest	Omnivore	Generalist	41.57	0	0	0	51.5933	1	11.1533	76.8335	4	12.534
5_13	Reg_5	Land_13	Patagioenas picazuro	2	Forest	Omnivore	Generalist	19.9	34.7826	1	0.57971	75.8725	6	2.27618	86.9565	16	2.71739
5_13	Reg_5	Land_13	Patagioenas picazuro	1	Forest	Omnivore	Generalist	19.9	34.7826	1	0.57971	75.8725	6	2.27618	86.9565	16	2.71739
5_13	Reg_5	Land_13	Patagioenas picazuro	2	Forest	Omnivore	Generalist	19.9	34.7826	1	0.57971	75.8725	6	2.27618	86.9565	16	2.71739
5_14	Reg_5	Land_14	Patagioenas picazuro	1	Forest	Omnivore	Generalist	17.97	116.959	3	2.04678	36.4188	4	0.60698	18.6335	7	0.310559
5_2	Reg_5	Land_2	Patagioenas picazuro	1	Forest	Omnivore	Generalist	46.16	169.096	4	3.79009	267.274	20	12.5285	270.627	47	21.2192
5_2	Reg_5	Land_2	Patagioenas picazuro	3	Forest	Omnivore	Generalist	46.16	169.096	4	3.79009	267.274	20	12.5285	270.627	47	21.2192
5_4	Reg_5	Land_4	Patagioenas picazuro	1	Forest	Omnivore	Generalist	122.64	0	0	0	42.4886	5	0.834598	59.7942	20	2.29082
5_5	Reg_5	Land_5	Patagioenas picazuro	1	Forest	Omnivore	Generalist	50.91	22.9885	1	0.862069	75.4148	1	9.65309	77.5194	2	12.9651
5_8	Reg_5	Land_8	Patagioenas picazuro	2	Forest	Omnivore	Generalist	62.11	246.334	2	8.5044	229.135	12	6.9044	252.28	44	14.2829
5_8	Reg_5	Land_8	Patagioenas picazuro	3	Forest	Omnivore	Generalist	62.11	246.334	2	8.5044	229.135	12	6.9044	252.28	44	14.2829
5_9	Reg_5	Land_9	Patagioenas picazuro	1	Forest	Omnivore	Generalist	26.2	215.116	4	8.13953	285.281	8	32.4734	192.972	21	25.5484
6_10	Reg_6	Land_10	Patagioenas picazuro	2	Forest	Omnivore	Generalist	200.37	0	0	0	0	0	0	0.776548	1	0.0194137
6_11	Reg_6	Land_11	Patagioenas picazuro	1	Forest	Omnivore	Generalist	31.32	0	0	0	0	0	0	0	0	0
6_15	Reg_6	Land_15	Patagioenas picazuro	2	Forest	Omnivore	Generalist	188.9	0	0	0	0	0	0	3.10559	1	0.11646
6_2	Reg_6	Land_2	Patagioenas picazuro	1	Forest	Omnivore	Generalist	8.09	133.721	1	14.8256	150.342	5	26.6515	127.742	28	31.0037
6_2	Reg_6	Land_2	Patagioenas picazuro	1	Forest	Omnivore	Generalist	8.09	133.721	1	14.8256	150.342	5	26.6515	127.742	28	31.0037
6_4	Reg_6	Land_4	Patagioenas picazuro	1	Forest	Omnivore	Generalist	39.06	115.942	1	8.4058	151.286	5	33.7368	119.519	10	54.3655
6_6	Reg_6	Land_6	Patagioenas picazuro	2	Forest	Omnivore	Generalist	57.8	144.928	2	3.76812	201.21	12	15.2799	130.021	26	16.7281
6_7	Reg_6	Land_7	Patagioenas picazuro	1	Forest	Omnivore	Generalist	34.93	0	0	0	21.2604	2	0.835232	52.0287	7	9.66803
6_7	Reg_6	Land_7	Patagioenas picazuro	2	Forest	Omnivore	Generalist	34.93	0	0	0	21.2604	2	0.835232	52.0287	7	9.66803
6_8	Reg_6	Land_8	Patagioenas picazuro	2	Forest	Omnivore	Generalist	45.47	75.5814	1	2.90698	69.4864	1	15.6344	49.2917	1	14.9622
7_10	Reg_7	Land_10	Patagioenas picazuro	2	Forest	Omnivore	Generalist	197.99	0	0	0	0	0	0	8.15376	4	0.174723
7_11	Reg_7	Land_11	Patagioenas picazuro	1	Forest	Omnivore	Generalist	45.42	92.7536	2	2.31884	81.8802	6	2.12282	52.3865	16	1.41638
7_12	Reg_7	Land_12	Patagioenas picazuro	1	Forest	Omnivore	Generalist	9.26	389.535	8	11.6279	218.347	19	5.30705	144.354	33	10.9818
7_13	Reg_7	Land_13	Patagioenas picazuro	1	Forest	Omnivore	Generalist	92.4	0	0	0	9.08403	2	0.302801	91.9496	10	14.452
7_14	Reg_7	Land_14	Patagioenas picazuro	2	Forest	Omnivore	Generalist	28.4	168.605	1	21.5116	95.3823	1	39.7426	83.4142	2	24.7915
7_2	Reg_7	Land_2	Patagioenas picazuro	1	Forest	Omnivore	Generalist	13.67	34.7826	1	0.57971	106.141	2	18.2714	164.92	14	28.0365
7_4	Reg_7	Land_4	Patagioenas picazuro	1	Forest	Omnivore	Generalist	122.04	81.6327	1	2.04082	30.3721	2	0.683371	72.6073	19	2.07727
7_6	Reg_7	Land_6	Patagioenas picazuro	1	Forest	Omnivore	Generalist	12.8	11.5942	1	0.289855	91.047	7	2.12443	89.6739	21	3.04736
7_7	Reg_7	Land_7	Patagioenas picazuro	2	Forest	Omnivore	Generalist	14.2	63.7681	1	4.92754	103.108	2	8.26384	165.697	17	22.0605
7_8	Reg_7	Land_8	Patagioenas picazuro	2	Forest	Omnivore	Generalist	100.29	0	0	0	9.11162	1	0.15186	58.6294	12	3.12561
7_8	Reg_7	Land_8	Patagioenas picazuro	2	Forest	Omnivore	Generalist	100.29	0	0	0	9.11162	1	0.15186	58.6294	12	3.12561
8_1	Reg_8	Land_1	Patagioenas picazuro	1	Forest	Omnivore	Generalist	213.56	28.9855	1	0.869565	33.3586	3	0.833965	35.3124	13	0.756694
8_11	Reg_8	Land_11	Patagioenas picazuro	1	Forest	Omnivore	Generalist	32.7	313.953	6	25	283.333	20	26.1364	299.573	72	21.1098
8_11	Reg_8	Land_11	Patagioenas picazuro	1	Forest	Omnivore	Generalist	32.7	313.953	6	25	283.333	20	26.1364	299.573	72	21.1098
8_12	Reg_8	Land_12	Patagioenas picazuro	1	Forest	Omnivore	Generalist	231.57	0	0	0	0	0	0	15.1427	5	0.388274
8_2	Reg_8	Land_2	Patagioenas picazuro	1	Forest	Omnivore	Generalist	509.54	0	0	0	0	0	0	0	0	0
8_3	Reg_8	Land_3	Patagioenas picazuro	1	Forest	Omnivore	Generalist	19.64	244.186	7	4.36047	490.509	35	10.9339	297.03	77	11.0464
8_3	Reg_8	Land_3	Patagioenas picazuro	1	Forest	Omnivore	Generalist	19.64	244.186	7	4.36047	490.509	35	10.9339	297.03	77	11.0464
8_3	Reg_8	Land_3	Patagioenas picazuro	1	Forest	Omnivore	Generalist	19.64	244.186	7	4.36047	490.509	35	10.9339	297.03	77	11.0464
8_4	Reg_8	Land_4	Patagioenas picazuro	1	Forest	Omnivore	Generalist	22.73	69.5652	3	1.44928	301.973	21	8.49772	326.737	73	18.6457
8_8	Reg_8	Land_8	Patagioenas picazuro	4	Forest	Omnivore	Generalist	184.8	0	0	0	0	0	0	22.1402	2	1.34007
9_12	Reg_9	Land_12	Patagioenas picazuro	1	Forest	Omnivore	Generalist	38.76	232.558	8	6.97674	298.938	20	14.9469	206.83	38	32.111
9_14	Reg_9	Land_14	Patagioenas picazuro	1	Forest	Omnivore	Generalist	83.98	168.116	5	3.18841	157.815	15	3.56601	136.646	44	6.03649
9_15	Reg_9	Land_15	Patagioenas picazuro	1	Forest	Omnivore	Generalist	162.13	11.6279	1	0.290698	56.0606	7	0.984848	79.1618	24	4.07451
9_15	Reg_9	Land_15	Patagioenas picazuro	1	Forest	Omnivore	Generalist	162.13	11.6279	1	0.290698	56.0606	7	0.984848	79.1618	24	4.07451
9_4	Reg_9	Land_4	Patagioenas picazuro	1	Forest	Omnivore	Generalist	73.56	0	0	0	60.4686	2	5.51776	130.747	18	13.9864
9_5	Reg_9	Land_5	Patagioenas picazuro	1	Forest	Omnivore	Generalist	22.06	264.368	4	20.1149	180.995	6	23.1523	164.341	16	24.7093
9_8	Reg_9	Land_8	Patagioenas picazuro	1	Forest	Omnivore	Generalist	25.41	249.275	4	18.5507	247.344	7	56.9803	156.535	18	73.4512
7_10	Reg_7	Land_10	Phacellodomus ruber	1	Shrubland	Invertivore	Generalist	197.99	0	0	0	0	0	0	8.15376	4	0.174723
3_1	Reg_3	Land_1	Phacellodomus rufifrons	1	Shrubland	Invertivore	Terrestrial	126.47	115.942	4	1.73913	75.815	11	1.28886	133.101	47	3.06558
11_4	Reg_11	Land_4	Pionus maximiliani	2	Forest	Granivore	Insessorial	66.35	289.855	8	4.92754	204.701	13	13.95	123.399	22	36.5541
11_5	Reg_11	Land_5	Pionus maximiliani	3	Forest	Granivore	Insessorial	24.24	308.14	2	38.6628	154.663	4	47.0053	148.234	10	45.6733
10_8	Reg_10	Land_8	Pitangus sulphuratus	1	Human Modified	Omnivore	Insessorial	17.47	191.86	1	30.814	131.918	1	31.3116	59.7594	1	17.5398
12_13	Reg_12	Land_13	Pitangus sulphuratus	1	Human Modified	Omnivore	Insessorial	130.36	110.145	5	2.31884	225.929	21	4.62472	193.248	58	4.94761
4_9	Reg_4	Land_9	Pitangus sulphuratus	1	Human Modified	Omnivore	Insessorial	45.13	127.907	3	2.03488	106.222	9	1.89681	112.922	32	2.96857
8_12	Reg_8	Land_12	Pitangus sulphuratus	1	Human Modified	Omnivore	Insessorial	231.57	0	0	0	0	0	0	15.1427	5	0.388274
9_3	Reg_9	Land_3	Pitangus sulphuratus	1	Human Modified	Omnivore	Insessorial	19.9	313.043	7	11.0145	218.513	9	14.7193	144.354	24	13.6205
8_2	Reg_8	Land_2	Platalea ajaja	1	Wetland	Aquatic predator	Terrestrial	509.54	0	0	0	0	0	0	0	0	0
1_11	Reg_1	Land_11	Progne tapera	2	Grassland	Invertivore	Aerial	3.56	244.186	3	49.1279	181.269	8	59.8943	126.14	17	67.2618
12_7	Reg_12	Land_7	Progne tapera	2	Grassland	Invertivore	Aerial	0	0	0	0	3.02343	1	0.0755858	65.5674	10	6.61494
2_15	Reg_2	Land_15	Progne tapera	2	Grassland	Invertivore	Aerial	41.27	81.1594	2	2.6087	183.612	14	6.37329	163.527	37	10.2544
4_12	Reg_4	Land_12	Progne tapera	2	Grassland	Invertivore	Aerial	159.3	0	0	0	0	0	0	92.4092	28	4.91167
4_12	Reg_4	Land_12	Progne tapera	1	Grassland	Invertivore	Aerial	159.3	0	0	0	0	0	0	92.4092	28	4.91167
4_9	Reg_4	Land_9	Progne tapera	1	Grassland	Invertivore	Aerial	45.13	127.907	3	2.03488	106.222	9	1.89681	112.922	32	2.96857
4_9	Reg_4	Land_9	Progne tapera	1	Grassland	Invertivore	Aerial	45.13	127.907	3	2.03488	106.222	9	1.89681	112.922	32	2.96857
4_9	Reg_4	Land_9	Progne tapera	1	Grassland	Invertivore	Aerial	45.13	127.907	3	2.03488	106.222	9	1.89681	112.922	32	2.96857
6_7	Reg_6	Land_7	Progne tapera	1	Grassland	Invertivore	Aerial	34.93	0	0	0	21.2604	2	0.835232	52.0287	7	9.66803
7_12	Reg_7	Land_12	Progne tapera	2	Grassland	Invertivore	Aerial	9.26	389.535	8	11.6279	218.347	19	5.30705	144.354	33	10.9818
8_12	Reg_8	Land_12	Progne tapera	5	Grassland	Invertivore	Aerial	231.57	0	0	0	0	0	0	15.1427	5	0.388274
8_13	Reg_8	Land_13	Progne tapera	1	Grassland	Invertivore	Aerial	209.91	0	0	0	0	0	0	6.98758	2	0.15528
8_15	Reg_8	Land_15	Progne tapera	2	Grassland	Invertivore	Aerial	20.7	34.7826	1	0.57971	92.5645	7	5.08346	118.789	23	9.53028
8_7	Reg_8	Land_7	Progne tapera	1	Grassland	Invertivore	Aerial	33.39	110.465	1	17.1512	87.9454	4	32.4488	141.25	20	26.1156
9_4	Reg_9	Land_4	Progne tapera	1	Grassland	Invertivore	Aerial	73.56	0	0	0	60.4686	2	5.51776	130.747	18	13.9864
11_1	Reg_11	Land_1	Psarocolius decumanus	1	Forest	Omnivore	Insessorial	31.73	98.8372	2	4.36047	151.745	4	21.2443	108.717	5	33.1974
2_1	Reg_2	Land_1	Psarocolius decumanus	1	Forest	Omnivore	Insessorial	65.41	0	0	0	51.5933	4	0.91047	32.596	11	0.582072
2_9	Reg_2	Land_9	Psarocolius decumanus	1	Forest	Omnivore	Insessorial	10.4	226.744	1	33.7209	112.291	1	39.302	101.669	11	43.5972
7_15	Reg_7	Land_15	Psarocolius decumanus	1	Forest	Omnivore	Insessorial	17.1	171.091	1	30.3835	136.674	1	27.0311	79.5962	1	13.8808
8_3	Reg_8	Land_3	Psarocolius decumanus	1	Forest	Omnivore	Insessorial	19.64	244.186	7	4.36047	490.509	35	10.9339	297.03	77	11.0464
4_11	Reg_4	Land_11	Pseudoleistes guirahuro	10	Human Modified	Omnivore	Terrestrial	119.04	0	0	0	0	0	0	40.7371	6	9.35015
7_6	Reg_7	Land_6	Pseudoleistes guirahuro	10	Human Modified	Omnivore	Terrestrial	12.8	11.5942	1	0.289855	91.047	7	2.12443	89.6739	21	3.04736
7_8	Reg_7	Land_8	Pseudoleistes guirahuro	4	Human Modified	Omnivore	Terrestrial	100.29	0	0	0	9.11162	1	0.15186	58.6294	12	3.12561
8_2	Reg_8	Land_2	Pseudoleistes guirahuro	4	Human Modified	Omnivore	Terrestrial	509.54	0	0	0	0	0	0	0	0	0
1_10	Reg_1	Land_10	Psittacara leucophthalmus	6	Forest	Omnivore	Insessorial	5.02	156.522	1	8.4058	159.332	11	4.24886	173.525	38	10.0932
1_11	Reg_1	Land_11	Psittacara leucophthalmus	2	Forest	Omnivore	Insessorial	3.56	244.186	3	49.1279	181.269	8	59.8943	126.14	17	67.2618
1_2	Reg_1	Land_2	Psittacara leucophthalmus	8	Forest	Omnivore	Insessorial	39.04	273.256	9	5.52326	238.421	18	5.08732	229.858	68	6.77538
1_5	Reg_1	Land_5	Psittacara leucophthalmus	2	Forest	Omnivore	Insessorial	9.52	430.233	8	23.5465	429.439	15	21.6237	268.402	38	20.1398
10_12	Reg_10	Land_12	Psittacara leucophthalmus	2	Forest	Omnivore	Insessorial	55.23	116.959	3	2.04678	53.1108	5	1.13809	110.248	17	12.3059
10_14	Reg_10	Land_14	Psittacara leucophthalmus	2	Forest	Omnivore	Insessorial	40.7	0	0	0	86.5604	2	17.9954	51.2522	3	26.325
10_2	Reg_10	Land_2	Psittacara leucophthalmus	12	Forest	Omnivore	Insessorial	38.4	169.591	2	6.14035	94.0819	3	5.38695	129.27	15	16.4208
10_6	Reg_10	Land_6	Psittacara leucophthalmus	2	Forest	Omnivore	Insessorial	15.06	93.0233	1	9.30233	72.8376	1	10.8498	42.7683	1	5.55988
10_8	Reg_10	Land_8	Psittacara leucophthalmus	2	Forest	Omnivore	Insessorial	17.47	191.86	1	30.814	131.918	1	31.3116	59.7594	1	17.5398
12_10	Reg_12	Land_10	Psittacara leucophthalmus	20	Forest	Omnivore	Insessorial	11.11	211.144	3	24.6334	168.437	6	43.5508	132.35	21	50.8442
12_10	Reg_12	Land_10	Psittacara leucophthalmus	4	Forest	Omnivore	Insessorial	11.11	211.144	3	24.6334	168.437	6	43.5508	132.35	21	50.8442
12_11	Reg_12	Land_11	Psittacara leucophthalmus	30	Forest	Omnivore	Insessorial	20.7	209.302	2	29.9419	143.505	6	35.7251	128.857	23	27.6732
12_11	Reg_12	Land_11	Psittacara leucophthalmus	2	Forest	Omnivore	Insessorial	20.7	209.302	2	29.9419	143.505	6	35.7251	128.857	23	27.6732
12_11	Reg_12	Land_11	Psittacara leucophthalmus	5	Forest	Omnivore	Insessorial	20.7	209.302	2	29.9419	143.505	6	35.7251	128.857	23	27.6732
12_6	Reg_12	Land_6	Psittacara leucophthalmus	6	Forest	Omnivore	Insessorial	0	52.3256	2	0.872093	74.4115	6	3.49279	114.153	16	16.3658
12_6	Reg_12	Land_6	Psittacara leucophthalmus	3	Forest	Omnivore	Insessorial	0	52.3256	2	0.872093	74.4115	6	3.49279	114.153	16	16.3658
2_10	Reg_2	Land_10	Psittacara leucophthalmus	175	Forest	Omnivore	Insessorial	103.7	0	0	0	9.1047	1	0.151745	16.6925	2	1.90217
2_11	Reg_2	Land_11	Psittacara leucophthalmus	2	Forest	Omnivore	Insessorial	14.86	272.464	2	37.1014	207.733	6	36.0121	142.414	16	37.4854
2_11	Reg_2	Land_11	Psittacara leucophthalmus	13	Forest	Omnivore	Insessorial	14.86	272.464	2	37.1014	207.733	6	36.0121	142.414	16	37.4854
2_11	Reg_2	Land_11	Psittacara leucophthalmus	12	Forest	Omnivore	Insessorial	14.86	272.464	2	37.1014	207.733	6	36.0121	142.414	16	37.4854
2_12	Reg_2	Land_12	Psittacara leucophthalmus	13	Forest	Omnivore	Insessorial	35.77	197.101	5	12.4638	261.725	14	17.3222	222.093	49	11.2017
2_13	Reg_2	Land_13	Psittacara leucophthalmus	4	Forest	Omnivore	Insessorial	8	215.116	5	9.30233	139.605	8	8.5736	148.523	31	9.79782
2_14	Reg_2	Land_14	Psittacara leucophthalmus	13	Forest	Omnivore	Insessorial	9.4	162.791	1	18.314	127.466	3	11.6085	103.421	13	10.9448
2_15	Reg_2	Land_15	Psittacara leucophthalmus	10	Forest	Omnivore	Insessorial	41.27	81.1594	2	2.6087	183.612	14	6.37329	163.527	37	10.2544
2_15	Reg_2	Land_15	Psittacara leucophthalmus	3	Forest	Omnivore	Insessorial	41.27	81.1594	2	2.6087	183.612	14	6.37329	163.527	37	10.2544
2_4	Reg_2	Land_4	Psittacara leucophthalmus	3	Forest	Omnivore	Insessorial	211.22	0	0	0	4.55235	1	0.0758725	43.0901	14	0.834627
2_7	Reg_2	Land_7	Psittacara leucophthalmus	10	Forest	Omnivore	Insessorial	43.09	87.2093	1	4.94186	192.279	8	15.8213	141.665	21	35.4745
2_7	Reg_2	Land_7	Psittacara leucophthalmus	2	Forest	Omnivore	Insessorial	43.09	87.2093	1	4.94186	192.279	8	15.8213	141.665	21	35.4745
2_7	Reg_2	Land_7	Psittacara leucophthalmus	2	Forest	Omnivore	Insessorial	43.09	87.2093	1	4.94186	192.279	8	15.8213	141.665	21	35.4745
2_7	Reg_2	Land_7	Psittacara leucophthalmus	11	Forest	Omnivore	Insessorial	43.09	87.2093	1	4.94186	192.279	8	15.8213	141.665	21	35.4745
3_12	Reg_3	Land_12	Psittacara leucophthalmus	7	Forest	Omnivore	Insessorial	22.46	98.5507	1	7.82609	169.954	5	27.8452	190.92	28	41.7734
3_13	Reg_3	Land_13	Psittacara leucophthalmus	5	Forest	Omnivore	Insessorial	15.88	127.536	2	4.92754	182.094	13	4.77997	199.457	49	22.3128
3_6	Reg_3	Land_6	Psittacara leucophthalmus	1	Forest	Omnivore	Insessorial	71.91	93.0233	3	1.45349	90.8403	9	5.45042	129.195	27	15.3637
3_8	Reg_3	Land_8	Psittacara leucophthalmus	3	Forest	Omnivore	Insessorial	40.12	68.9655	2	1.14943	119.155	9	15.3846	130.233	24	36.938
4_13	Reg_4	Land_13	Psittacara leucophthalmus	2	Forest	Omnivore	Insessorial	48.4	58.1395	2	1.16279	121.12	5	13.4746	135.015	33	20.4074
4_13	Reg_4	Land_13	Psittacara leucophthalmus	2	Forest	Omnivore	Insessorial	48.4	58.1395	2	1.16279	121.12	5	13.4746	135.015	33	20.4074
4_13	Reg_4	Land_13	Psittacara leucophthalmus	2	Forest	Omnivore	Insessorial	48.4	58.1395	2	1.16279	121.12	5	13.4746	135.015	33	20.4074
4_14	Reg_4	Land_14	Psittacara leucophthalmus	6	Forest	Omnivore	Insessorial	85.3	162.319	5	2.89855	183.612	17	3.64188	183.618	43	11.6848
4_14	Reg_4	Land_14	Psittacara leucophthalmus	2	Forest	Omnivore	Insessorial	85.3	162.319	5	2.89855	183.612	17	3.64188	183.618	43	11.6848
4_5	Reg_4	Land_5	Psittacara leucophthalmus	1	Forest	Omnivore	Insessorial	5.02	201.149	1	40.2299	182.504	5	22.2474	165.891	32	10.1938
4_5	Reg_4	Land_5	Psittacara leucophthalmus	1	Forest	Omnivore	Insessorial	5.02	201.149	1	40.2299	182.504	5	22.2474	165.891	32	10.1938
6_10	Reg_6	Land_10	Psittacara leucophthalmus	2	Forest	Omnivore	Insessorial	200.37	0	0	0	0	0	0	0.776548	1	0.0194137
6_11	Reg_6	Land_11	Psittacara leucophthalmus	10	Forest	Omnivore	Insessorial	31.32	0	0	0	0	0	0	0	0	0
6_3	Reg_6	Land_3	Psittacara leucophthalmus	2	Forest	Omnivore	Insessorial	29.15	180.233	2	20.9302	118.361	4	32.8528	105.549	18	41.754
6_5	Reg_6	Land_5	Psittacara leucophthalmus	2	Forest	Omnivore	Insessorial	89.83	115.942	2	2.02899	229.135	21	4.32473	157.701	53	3.4764
6_5	Reg_6	Land_5	Psittacara leucophthalmus	7	Forest	Omnivore	Insessorial	89.83	115.942	2	2.02899	229.135	21	4.32473	157.701	53	3.4764
7_11	Reg_7	Land_11	Psittacara leucophthalmus	6	Forest	Omnivore	Insessorial	45.42	92.7536	2	2.31884	81.8802	6	2.12282	52.3865	16	1.41638
7_12	Reg_7	Land_12	Psittacara leucophthalmus	2	Forest	Omnivore	Insessorial	9.26	389.535	8	11.6279	218.347	19	5.30705	144.354	33	10.9818
7_12	Reg_7	Land_12	Psittacara leucophthalmus	4	Forest	Omnivore	Insessorial	9.26	389.535	8	11.6279	218.347	19	5.30705	144.354	33	10.9818
7_12	Reg_7	Land_12	Psittacara leucophthalmus	6	Forest	Omnivore	Insessorial	9.26	389.535	8	11.6279	218.347	19	5.30705	144.354	33	10.9818
7_12	Reg_7	Land_12	Psittacara leucophthalmus	6	Forest	Omnivore	Insessorial	9.26	389.535	8	11.6279	218.347	19	5.30705	144.354	33	10.9818
7_14	Reg_7	Land_14	Psittacara leucophthalmus	2	Forest	Omnivore	Insessorial	28.4	168.605	1	21.5116	95.3823	1	39.7426	83.4142	2	24.7915
7_15	Reg_7	Land_15	Psittacara leucophthalmus	13	Forest	Omnivore	Insessorial	17.1	171.091	1	30.3835	136.674	1	27.0311	79.5962	1	13.8808
7_3	Reg_7	Land_3	Psittacara leucophthalmus	8	Forest	Omnivore	Insessorial	0	162.791	4	3.19767	90.8403	8	1.5897	35.7074	12	0.853872
7_5	Reg_7	Land_5	Psittacara leucophthalmus	2	Forest	Omnivore	Insessorial	5.73	285.714	6	8.45481	156.416	10	5.31511	75.7135	19	2.09668
7_6	Reg_7	Land_6	Psittacara leucophthalmus	2	Forest	Omnivore	Insessorial	12.8	11.5942	1	0.289855	91.047	7	2.12443	89.6739	21	3.04736
7_6	Reg_7	Land_6	Psittacara leucophthalmus	8	Forest	Omnivore	Insessorial	12.8	11.5942	1	0.289855	91.047	7	2.12443	89.6739	21	3.04736
7_7	Reg_7	Land_7	Psittacara leucophthalmus	3	Forest	Omnivore	Insessorial	14.2	63.7681	1	4.92754	103.108	2	8.26384	165.697	17	22.0605
7_7	Reg_7	Land_7	Psittacara leucophthalmus	3	Forest	Omnivore	Insessorial	14.2	63.7681	1	4.92754	103.108	2	8.26384	165.697	17	22.0605
7_7	Reg_7	Land_7	Psittacara leucophthalmus	8	Forest	Omnivore	Insessorial	14.2	63.7681	1	4.92754	103.108	2	8.26384	165.697	17	22.0605
7_8	Reg_7	Land_8	Psittacara leucophthalmus	2	Forest	Omnivore	Insessorial	100.29	0	0	0	9.11162	1	0.15186	58.6294	12	3.12561
7_9	Reg_7	Land_9	Psittacara leucophthalmus	2	Forest	Omnivore	Insessorial	0	156.977	1	53.7791	115.064	1	31.2642	99.3596	10	20.9393
7_9	Reg_7	Land_9	Psittacara leucophthalmus	2	Forest	Omnivore	Insessorial	0	156.977	1	53.7791	115.064	1	31.2642	99.3596	10	20.9393
8_3	Reg_8	Land_3	Psittacara leucophthalmus	2	Forest	Omnivore	Insessorial	19.64	244.186	7	4.36047	490.509	35	10.9339	297.03	77	11.0464
9_2	Reg_9	Land_2	Psittacara leucophthalmus	2	Forest	Omnivore	Insessorial	6.36	296.512	2	38.6628	205.438	4	23.1118	121.483	11	12.4394
4_13	Reg_4	Land_13	Pygochelidon cyanoleuca	1	Human Modified	Invertivore	Aerial	48.4	58.1395	2	1.16279	121.12	5	13.4746	135.015	33	20.4074
4_3	Reg_4	Land_3	Pygochelidon cyanoleuca	1	Human Modified	Invertivore	Aerial	77.02	0	0	0	62.1212	3	4.84848	73.7291	2	23.1665
4_6	Reg_4	Land_6	Pygochelidon cyanoleuca	1	Human Modified	Invertivore	Aerial	3.56	470.93	8	17.1512	257.967	16	12.5948	231.277	64	12.5146
5_6	Reg_5	Land_6	Pygochelidon cyanoleuca	1	Human Modified	Invertivore	Aerial	33.37	139.535	4	6.39535	125.378	5	5.13595	123.035	21	5.49195
9_8	Reg_9	Land_8	Pygochelidon cyanoleuca	8	Human Modified	Invertivore	Aerial	25.41	249.275	4	18.5507	247.344	7	56.9803	156.535	18	73.4512
6_6	Reg_6	Land_6	Pyrocephalus rubinus	1	Woodland	Invertivore	Insessorial	57.8	144.928	2	3.76812	201.21	12	15.2799	130.021	26	16.7281
1_14	Reg_1	Land_14	Ramphastos toco	2	Grassland	Frugivore	Insessorial	0	208.696	1	60	199.697	3	45.6127	140.889	3	28.1584
10_10	Reg_10	Land_10	Ramphastos toco	7	Grassland	Frugivore	Insessorial	54.57	0	0	0	48.2655	1	4.0724	43.0233	1	7.5
11_14	Reg_11	Land_14	Ramphastos toco	3	Grassland	Frugivore	Insessorial	15.88	144.928	2	15.0725	153.263	4	45.5235	105.652	6	58.7881
11_4	Reg_11	Land_4	Ramphastos toco	2	Grassland	Frugivore	Insessorial	66.35	289.855	8	4.92754	204.701	13	13.95	123.399	22	36.5541
11_6	Reg_11	Land_6	Ramphastos toco	2	Grassland	Frugivore	Insessorial	18.59	123.167	1	20.5279	245.827	3	38.3915	185.911	5	49.0006
12_10	Reg_12	Land_10	Ramphastos toco	2	Grassland	Frugivore	Insessorial	11.11	211.144	3	24.6334	168.437	6	43.5508	132.35	21	50.8442
12_13	Reg_12	Land_13	Ramphastos toco	2	Grassland	Frugivore	Insessorial	130.36	110.145	5	2.31884	225.929	21	4.62472	193.248	58	4.94761
12_13	Reg_12	Land_13	Ramphastos toco	1	Grassland	Frugivore	Insessorial	130.36	110.145	5	2.31884	225.929	21	4.62472	193.248	58	4.94761
12_13	Reg_12	Land_13	Ramphastos toco	2	Grassland	Frugivore	Insessorial	130.36	110.145	5	2.31884	225.929	21	4.62472	193.248	58	4.94761
12_5	Reg_12	Land_5	Ramphastos toco	3	Grassland	Frugivore	Insessorial	79.86	0	0	0	52.9501	7	0.983359	95.0718	20	10.1669
12_6	Reg_12	Land_6	Ramphastos toco	2	Grassland	Frugivore	Insessorial	0	52.3256	2	0.872093	74.4115	6	3.49279	114.153	16	16.3658
12_8	Reg_12	Land_8	Ramphastos toco	3	Grassland	Frugivore	Insessorial	18.1	141.593	1	23.3038	136.674	2	13.2118	92.7975	8	11.7841
12_9	Reg_12	Land_9	Ramphastos toco	3	Grassland	Frugivore	Insessorial	48.48	109.195	3	2.01149	177.979	12	12.8959	142.248	26	27.7519
2_14	Reg_2	Land_14	Ramphastos toco	3	Grassland	Frugivore	Insessorial	9.4	162.791	1	18.314	127.466	3	11.6085	103.421	13	10.9448
2_9	Reg_2	Land_9	Ramphastos toco	1	Grassland	Frugivore	Insessorial	10.4	226.744	1	33.7209	112.291	1	39.302	101.669	11	43.5972
3_1	Reg_3	Land_1	Ramphastos toco	5	Grassland	Frugivore	Insessorial	126.47	115.942	4	1.73913	75.815	11	1.28886	133.101	47	3.06558
3_15	Reg_3	Land_15	Ramphastos toco	1	Grassland	Frugivore	Insessorial	25.4	23.1214	1	0.867052	83.1444	5	8.76795	183.511	33	18.3705
3_7	Reg_3	Land_7	Ramphastos toco	1	Grassland	Frugivore	Insessorial	46.96	186.047	5	4.06977	84.5921	6	1.96375	93.9259	16	10.033
3_7	Reg_3	Land_7	Ramphastos toco	4	Grassland	Frugivore	Insessorial	46.96	186.047	5	4.06977	84.5921	6	1.96375	93.9259	16	10.033
3_8	Reg_3	Land_8	Ramphastos toco	1	Grassland	Frugivore	Insessorial	40.12	68.9655	2	1.14943	119.155	9	15.3846	130.233	24	36.938
3_9	Reg_3	Land_9	Ramphastos toco	3	Grassland	Frugivore	Insessorial	24.5	162.791	3	10.7558	221.045	12	25.9652	261.595	38	37.7062
3_9	Reg_3	Land_9	Ramphastos toco	1	Grassland	Frugivore	Insessorial	24.5	162.791	3	10.7558	221.045	12	25.9652	261.595	38	37.7062
3_9	Reg_3	Land_9	Ramphastos toco	1	Grassland	Frugivore	Insessorial	24.5	162.791	3	10.7558	221.045	12	25.9652	261.595	38	37.7062
3_9	Reg_3	Land_9	Ramphastos toco	2	Grassland	Frugivore	Insessorial	24.5	162.791	3	10.7558	221.045	12	25.9652	261.595	38	37.7062
4_9	Reg_4	Land_9	Ramphastos toco	1	Grassland	Frugivore	Insessorial	45.13	127.907	3	2.03488	106.222	9	1.89681	112.922	32	2.96857
5_7	Reg_5	Land_7	Ramphastos toco	4	Grassland	Frugivore	Insessorial	0	34.8837	1	0.581395	69.8027	5	1.44158	97.4568	26	6.05708
6_2	Reg_6	Land_2	Ramphastos toco	2	Grassland	Frugivore	Insessorial	8.09	133.721	1	14.8256	150.342	5	26.6515	127.742	28	31.0037
9_10	Reg_9	Land_10	Ramphastos toco	1	Grassland	Frugivore	Insessorial	32.73	163.265	4	5.8309	294.609	26	8.88383	300.524	78	19.006
9_8	Reg_9	Land_8	Ramphastos toco	1	Grassland	Frugivore	Insessorial	25.41	249.275	4	18.5507	247.344	7	56.9803	156.535	18	73.4512
10_2	Reg_10	Land_2	Saltator fuliginosus	1	Forest	Invertivore	Insessorial	38.4	169.591	2	6.14035	94.0819	3	5.38695	129.27	15	16.4208
10_2	Reg_10	Land_2	Saltator fuliginosus	1	Forest	Invertivore	Insessorial	38.4	169.591	2	6.14035	94.0819	3	5.38695	129.27	15	16.4208
1_15	Reg_1	Land_15	Sicalis flaveola	1	Shrubland	Granivore	Terrestrial	65.42	116.618	2	2.33236	185.941	6	13.9078	177.019	21	30.5707
1_15	Reg_1	Land_15	Sicalis flaveola	1	Shrubland	Granivore	Terrestrial	65.42	116.618	2	2.33236	185.941	6	13.9078	177.019	21	30.5707
1_5	Reg_1	Land_5	Sicalis flaveola	1	Shrubland	Granivore	Terrestrial	9.52	430.233	8	23.5465	429.439	15	21.6237	268.402	38	20.1398
10_13	Reg_10	Land_13	Sicalis flaveola	1	Shrubland	Granivore	Terrestrial	20.7	128.28	3	3.49854	103.265	9	2.58162	63.2887	22	1.57251
10_7	Reg_10	Land_7	Sicalis flaveola	5	Shrubland	Granivore	Terrestrial	95.6	0	0	0	0	0	0	43.4698	2	5.95769
10_7	Reg_10	Land_7	Sicalis flaveola	1	Shrubland	Granivore	Terrestrial	95.6	0	0	0	0	0	0	43.4698	2	5.95769
10_7	Reg_10	Land_7	Sicalis flaveola	2	Shrubland	Granivore	Terrestrial	95.6	0	0	0	0	0	0	43.4698	2	5.95769
10_8	Reg_10	Land_8	Sicalis flaveola	18	Shrubland	Granivore	Terrestrial	17.47	191.86	1	30.814	131.918	1	31.3116	59.7594	1	17.5398
10_8	Reg_10	Land_8	Sicalis flaveola	2	Shrubland	Granivore	Terrestrial	17.47	191.86	1	30.814	131.918	1	31.3116	59.7594	1	17.5398
10_8	Reg_10	Land_8	Sicalis flaveola	9	Shrubland	Granivore	Terrestrial	17.47	191.86	1	30.814	131.918	1	31.3116	59.7594	1	17.5398
10_9	Reg_10	Land_9	Sicalis flaveola	6	Shrubland	Granivore	Terrestrial	24.86	115.942	1	11.3043	86.4291	1	28.8855	73.3411	1	20.5666
11_1	Reg_11	Land_1	Sicalis flaveola	2	Shrubland	Granivore	Terrestrial	31.73	98.8372	2	4.36047	151.745	4	21.2443	108.717	5	33.1974
11_12	Reg_11	Land_12	Sicalis flaveola	1	Shrubland	Granivore	Terrestrial	27.13	139.13	2	3.76812	149.773	10	4.84115	121.459	21	22.5262
11_3	Reg_11	Land_3	Sicalis flaveola	1	Shrubland	Granivore	Terrestrial	63.23	140.351	2	3.21637	151.745	5	15.3263	95.4969	14	14.771
11_3	Reg_11	Land_3	Sicalis flaveola	2	Shrubland	Granivore	Terrestrial	63.23	140.351	2	3.21637	151.745	5	15.3263	95.4969	14	14.771
12_15	Reg_12	Land_15	Sicalis flaveola	1	Shrubland	Granivore	Terrestrial	41.98	179.71	4	6.08696	175.492	5	38.5779	179.666	17	54.6566
12_4	Reg_12	Land_4	Sicalis flaveola	34	Shrubland	Granivore	Terrestrial	55.94	57.971	2	1.15942	170.953	8	14.2209	149.486	20	20.2097
12_5	Reg_12	Land_5	Sicalis flaveola	1	Shrubland	Granivore	Terrestrial	79.86	0	0	0	52.9501	7	0.983359	95.0718	20	10.1669
2_1	Reg_2	Land_1	Sicalis flaveola	4	Shrubland	Granivore	Terrestrial	65.41	0	0	0	51.5933	4	0.91047	32.596	11	0.582072
2_10	Reg_2	Land_10	Sicalis flaveola	2	Shrubland	Granivore	Terrestrial	103.7	0	0	0	9.1047	1	0.151745	16.6925	2	1.90217
2_10	Reg_2	Land_10	Sicalis flaveola	4	Shrubland	Granivore	Terrestrial	103.7	0	0	0	9.1047	1	0.151745	16.6925	2	1.90217
2_12	Reg_2	Land_12	Sicalis flaveola	1	Shrubland	Granivore	Terrestrial	35.77	197.101	5	12.4638	261.725	14	17.3222	222.093	49	11.2017
2_15	Reg_2	Land_15	Sicalis flaveola	2	Shrubland	Granivore	Terrestrial	41.27	81.1594	2	2.6087	183.612	14	6.37329	163.527	37	10.2544
2_2	Reg_2	Land_2	Sicalis flaveola	1	Shrubland	Granivore	Terrestrial	148.14	167.63	4	3.17919	55.9335	5	1.0582	51.9884	17	1.00873
2_3	Reg_2	Land_3	Sicalis flaveola	2	Shrubland	Granivore	Terrestrial	214.58	153.392	5	2.94985	92.6348	9	1.74639	47.3694	16	0.834789
2_3	Reg_2	Land_3	Sicalis flaveola	2	Shrubland	Granivore	Terrestrial	214.58	153.392	5	2.94985	92.6348	9	1.74639	47.3694	16	0.834789
2_3	Reg_2	Land_3	Sicalis flaveola	3	Shrubland	Granivore	Terrestrial	214.58	153.392	5	2.94985	92.6348	9	1.74639	47.3694	16	0.834789
2_4	Reg_2	Land_4	Sicalis flaveola	2	Shrubland	Granivore	Terrestrial	211.22	0	0	0	4.55235	1	0.0758725	43.0901	14	0.834627
2_4	Reg_2	Land_4	Sicalis flaveola	1	Shrubland	Granivore	Terrestrial	211.22	0	0	0	4.55235	1	0.0758725	43.0901	14	0.834627
2_4	Reg_2	Land_4	Sicalis flaveola	1	Shrubland	Granivore	Terrestrial	211.22	0	0	0	4.55235	1	0.0758725	43.0901	14	0.834627
2_8	Reg_2	Land_8	Sicalis flaveola	4	Shrubland	Granivore	Terrestrial	114.24	127.907	4	2.61628	122.356	11	2.26586	153.309	41	6.86978
2_8	Reg_2	Land_8	Sicalis flaveola	2	Shrubland	Granivore	Terrestrial	114.24	127.907	4	2.61628	122.356	11	2.26586	153.309	41	6.86978
2_8	Reg_2	Land_8	Sicalis flaveola	2	Shrubland	Granivore	Terrestrial	114.24	127.907	4	2.61628	122.356	11	2.26586	153.309	41	6.86978
3_1	Reg_3	Land_1	Sicalis flaveola	1	Shrubland	Granivore	Terrestrial	126.47	115.942	4	1.73913	75.815	11	1.28886	133.101	47	3.06558
3_14	Reg_3	Land_14	Sicalis flaveola	1	Shrubland	Granivore	Terrestrial	33.76	151.163	2	10.7558	165.026	9	19.9849	160.745	32	31.9744
3_2	Reg_3	Land_2	Sicalis flaveola	2	Shrubland	Granivore	Terrestrial	7.58	387.097	7	29.3255	336.874	21	31.4871	201.048	49	41.3546
3_3	Reg_3	Land_3	Sicalis flaveola	2	Shrubland	Granivore	Terrestrial	33.38	115.942	1	13.3333	175.492	5	40.8472	196.352	22	44.4315
4_12	Reg_4	Land_12	Sicalis flaveola	2	Shrubland	Granivore	Terrestrial	159.3	0	0	0	0	0	0	92.4092	28	4.91167
4_12	Reg_4	Land_12	Sicalis flaveola	3	Shrubland	Granivore	Terrestrial	159.3	0	0	0	0	0	0	92.4092	28	4.91167
4_13	Reg_4	Land_13	Sicalis flaveola	1	Shrubland	Granivore	Terrestrial	48.4	58.1395	2	1.16279	121.12	5	13.4746	135.015	33	20.4074
4_4	Reg_4	Land_4	Sicalis flaveola	1	Shrubland	Granivore	Terrestrial	63.51	360.465	7	8.13953	248.862	16	7.20789	142.026	31	5.82072
4_9	Reg_4	Land_9	Sicalis flaveola	1	Shrubland	Granivore	Terrestrial	45.13	127.907	3	2.03488	106.222	9	1.89681	112.922	32	2.96857
5_11	Reg_5	Land_11	Sicalis flaveola	2	Shrubland	Granivore	Terrestrial	41.57	0	0	0	51.5933	1	11.1533	76.8335	4	12.534
5_6	Reg_5	Land_6	Sicalis flaveola	2	Shrubland	Granivore	Terrestrial	33.37	139.535	4	6.39535	125.378	5	5.13595	123.035	21	5.49195
5_8	Reg_5	Land_8	Sicalis flaveola	6	Shrubland	Granivore	Terrestrial	62.11	246.334	2	8.5044	229.135	12	6.9044	252.28	44	14.2829
5_8	Reg_5	Land_8	Sicalis flaveola	1	Shrubland	Granivore	Terrestrial	62.11	246.334	2	8.5044	229.135	12	6.9044	252.28	44	14.2829
5_8	Reg_5	Land_8	Sicalis flaveola	2	Shrubland	Granivore	Terrestrial	62.11	246.334	2	8.5044	229.135	12	6.9044	252.28	44	14.2829
5_9	Reg_5	Land_9	Sicalis flaveola	2	Shrubland	Granivore	Terrestrial	26.2	215.116	4	8.13953	285.281	8	32.4734	192.972	21	25.5484
6_1	Reg_6	Land_1	Sicalis flaveola	2	Shrubland	Granivore	Terrestrial	24.24	275.862	8	5.17241	140.271	14	2.71493	143.023	36	16.4341
6_1	Reg_6	Land_1	Sicalis flaveola	7	Shrubland	Granivore	Terrestrial	24.24	275.862	8	5.17241	140.271	14	2.71493	143.023	36	16.4341
6_11	Reg_6	Land_11	Sicalis flaveola	1	Shrubland	Granivore	Terrestrial	31.32	0	0	0	0	0	0	0	0	0
6_11	Reg_6	Land_11	Sicalis flaveola	7	Shrubland	Granivore	Terrestrial	31.32	0	0	0	0	0	0	0	0	0
6_13	Reg_6	Land_13	Sicalis flaveola	2	Shrubland	Granivore	Terrestrial	22.46	139.535	1	19.186	72.8376	1	6.14568	18.6263	1	1.57159
6_6	Reg_6	Land_6	Sicalis flaveola	2	Shrubland	Granivore	Terrestrial	57.8	144.928	2	3.76812	201.21	12	15.2799	130.021	26	16.7281
6_6	Reg_6	Land_6	Sicalis flaveola	3	Shrubland	Granivore	Terrestrial	57.8	144.928	2	3.76812	201.21	12	15.2799	130.021	26	16.7281
6_9	Reg_6	Land_9	Sicalis flaveola	1	Shrubland	Granivore	Terrestrial	28.63	0	0	0	0	0	0	0	0	0
7_14	Reg_7	Land_14	Sicalis flaveola	1	Shrubland	Granivore	Terrestrial	28.4	168.605	1	21.5116	95.3823	1	39.7426	83.4142	2	24.7915
7_14	Reg_7	Land_14	Sicalis flaveola	1	Shrubland	Granivore	Terrestrial	28.4	168.605	1	21.5116	95.3823	1	39.7426	83.4142	2	24.7915
7_14	Reg_7	Land_14	Sicalis flaveola	2	Shrubland	Granivore	Terrestrial	28.4	168.605	1	21.5116	95.3823	1	39.7426	83.4142	2	24.7915
7_2	Reg_7	Land_2	Sicalis flaveola	1	Shrubland	Granivore	Terrestrial	13.67	34.7826	1	0.57971	106.141	2	18.2714	164.92	14	28.0365
7_6	Reg_7	Land_6	Sicalis flaveola	1	Shrubland	Granivore	Terrestrial	12.8	11.5942	1	0.289855	91.047	7	2.12443	89.6739	21	3.04736
8_1	Reg_8	Land_1	Sicalis flaveola	1	Shrubland	Granivore	Terrestrial	213.56	28.9855	1	0.869565	33.3586	3	0.833965	35.3124	13	0.756694
8_10	Reg_8	Land_10	Sicalis flaveola	1	Shrubland	Granivore	Terrestrial	30.21	175.953	3	3.22581	197.269	15	8.27011	229.381	61	18.1254
8_10	Reg_8	Land_10	Sicalis flaveola	1	Shrubland	Granivore	Terrestrial	30.21	175.953	3	3.22581	197.269	15	8.27011	229.381	61	18.1254
8_10	Reg_8	Land_10	Sicalis flaveola	1	Shrubland	Granivore	Terrestrial	30.21	175.953	3	3.22581	197.269	15	8.27011	229.381	61	18.1254
8_10	Reg_8	Land_10	Sicalis flaveola	2	Shrubland	Granivore	Terrestrial	30.21	175.953	3	3.22581	197.269	15	8.27011	229.381	61	18.1254
8_12	Reg_8	Land_12	Sicalis flaveola	7	Shrubland	Granivore	Terrestrial	231.57	0	0	0	0	0	0	15.1427	5	0.388274
8_13	Reg_8	Land_13	Sicalis flaveola	4	Shrubland	Granivore	Terrestrial	209.91	0	0	0	0	0	0	6.98758	2	0.15528
8_13	Reg_8	Land_13	Sicalis flaveola	18	Shrubland	Granivore	Terrestrial	209.91	0	0	0	0	0	0	6.98758	2	0.15528
8_13	Reg_8	Land_13	Sicalis flaveola	8	Shrubland	Granivore	Terrestrial	209.91	0	0	0	0	0	0	6.98758	2	0.15528
8_13	Reg_8	Land_13	Sicalis flaveola	1	Shrubland	Granivore	Terrestrial	209.91	0	0	0	0	0	0	6.98758	2	0.15528
8_13	Reg_8	Land_13	Sicalis flaveola	1	Shrubland	Granivore	Terrestrial	209.91	0	0	0	0	0	0	6.98758	2	0.15528
8_2	Reg_8	Land_2	Sicalis flaveola	2	Shrubland	Granivore	Terrestrial	509.54	0	0	0	0	0	0	0	0	0
8_2	Reg_8	Land_2	Sicalis flaveola	2	Shrubland	Granivore	Terrestrial	509.54	0	0	0	0	0	0	0	0	0
8_3	Reg_8	Land_3	Sicalis flaveola	1	Shrubland	Granivore	Terrestrial	19.64	244.186	7	4.36047	490.509	35	10.9339	297.03	77	11.0464
8_3	Reg_8	Land_3	Sicalis flaveola	1	Shrubland	Granivore	Terrestrial	19.64	244.186	7	4.36047	490.509	35	10.9339	297.03	77	11.0464
8_5	Reg_8	Land_5	Sicalis flaveola	2	Shrubland	Granivore	Terrestrial	32.39	379.31	10	8.62069	295.626	22	15.6863	266.667	49	21.1434
8_6	Reg_8	Land_6	Sicalis flaveola	1	Shrubland	Granivore	Terrestrial	15.71	0	0	0	0	0	0	19.0144	1	3.82227
8_6	Reg_8	Land_6	Sicalis flaveola	1	Shrubland	Granivore	Terrestrial	15.71	0	0	0	0	0	0	19.0144	1	3.82227
8_8	Reg_8	Land_8	Sicalis flaveola	4	Shrubland	Granivore	Terrestrial	184.8	0	0	0	0	0	0	22.1402	2	1.34007
8_8	Reg_8	Land_8	Sicalis flaveola	3	Shrubland	Granivore	Terrestrial	184.8	0	0	0	0	0	0	22.1402	2	1.34007
9_12	Reg_9	Land_12	Sicalis flaveola	1	Shrubland	Granivore	Terrestrial	38.76	232.558	8	6.97674	298.938	20	14.9469	206.83	38	32.111
9_3	Reg_9	Land_3	Sicalis flaveola	1	Shrubland	Granivore	Terrestrial	19.9	313.043	7	11.0145	218.513	9	14.7193	144.354	24	13.6205
9_5	Reg_9	Land_5	Sicalis flaveola	1	Shrubland	Granivore	Terrestrial	22.06	264.368	4	20.1149	180.995	6	23.1523	164.341	16	24.7093
1_15	Reg_1	Land_15	Sicalis luteola	1	Grassland	Granivore	Terrestrial	65.42	116.618	2	2.33236	185.941	6	13.9078	177.019	21	30.5707
1_6	Reg_1	Land_6	Sicalis luteola	4	Grassland	Granivore	Terrestrial	37.06	162.791	4	8.13953	136.26	6	16.8055	146.266	23	11.4452
1_6	Reg_1	Land_6	Sicalis luteola	2	Grassland	Granivore	Terrestrial	37.06	162.791	4	8.13953	136.26	6	16.8055	146.266	23	11.4452
11_2	Reg_11	Land_2	Sicalis luteola	15	Grassland	Granivore	Terrestrial	28.76	98.8372	1	8.72093	68.3371	1	27.4108	128.519	15	23.9371
7_3	Reg_7	Land_3	Sicalis luteola	8	Grassland	Granivore	Terrestrial	0	162.791	4	3.19767	90.8403	8	1.5897	35.7074	12	0.853872
7_4	Reg_7	Land_4	Sicalis luteola	1	Grassland	Granivore	Terrestrial	122.04	81.6327	1	2.04082	30.3721	2	0.683371	72.6073	19	2.07727
7_8	Reg_7	Land_8	Sicalis luteola	1	Grassland	Granivore	Terrestrial	100.29	0	0	0	9.11162	1	0.15186	58.6294	12	3.12561
10_13	Reg_10	Land_13	Sporophila bouvreuil	1	Grassland	Granivore	Insessorial	20.7	128.28	3	3.49854	103.265	9	2.58162	63.2887	22	1.57251
1_15	Reg_1	Land_15	Sporophila caerulescens	2	Shrubland	Granivore	Generalist	65.42	116.618	2	2.33236	185.941	6	13.9078	177.019	21	30.5707
12_13	Reg_12	Land_13	Sporophila caerulescens	2	Shrubland	Granivore	Generalist	130.36	110.145	5	2.31884	225.929	21	4.62472	193.248	58	4.94761
12_7	Reg_12	Land_7	Sporophila caerulescens	1	Shrubland	Granivore	Generalist	0	0	0	0	3.02343	1	0.0755858	65.5674	10	6.61494
2_13	Reg_2	Land_13	Sporophila caerulescens	1	Shrubland	Granivore	Generalist	8	215.116	5	9.30233	139.605	8	8.5736	148.523	31	9.79782
2_5	Reg_2	Land_5	Sporophila caerulescens	2	Shrubland	Granivore	Generalist	0	0	0	0	19.7269	2	0.531108	92.7795	23	5.2795
2_5	Reg_2	Land_5	Sporophila caerulescens	1	Shrubland	Granivore	Generalist	0	0	0	0	19.7269	2	0.531108	92.7795	23	5.2795
4_4	Reg_4	Land_4	Sporophila caerulescens	2	Shrubland	Granivore	Generalist	63.51	360.465	7	8.13953	248.862	16	7.20789	142.026	31	5.82072
5_1	Reg_5	Land_1	Sporophila caerulescens	1	Shrubland	Granivore	Generalist	5.02	295.652	2	37.1014	170.953	6	24.8109	163.368	32	10.6131
3_3	Reg_3	Land_3	Sporophila lineola	1	Shrubland	Granivore	Generalist	33.38	115.942	1	13.3333	175.492	5	40.8472	196.352	22	44.4315
2_5	Reg_2	Land_5	Sporophila nigricollis	2	Shrubland	Granivore	Insessorial	0	0	0	0	19.7269	2	0.531108	92.7795	23	5.2795
1_9	Reg_1	Land_9	Stelgidopteryx ruficollis	1	Shrubland	Invertivore	Aerial	13.66	226.087	3	21.4493	201.21	3	34.8714	144.05	19	30.6737
10_10	Reg_10	Land_10	Stelgidopteryx ruficollis	1	Shrubland	Invertivore	Aerial	54.57	0	0	0	48.2655	1	4.0724	43.0233	1	7.5
10_8	Reg_10	Land_8	Stelgidopteryx ruficollis	1	Shrubland	Invertivore	Aerial	17.47	191.86	1	30.814	131.918	1	31.3116	59.7594	1	17.5398
10_8	Reg_10	Land_8	Stelgidopteryx ruficollis	2	Shrubland	Invertivore	Aerial	17.47	191.86	1	30.814	131.918	1	31.3116	59.7594	1	17.5398
10_9	Reg_10	Land_9	Stelgidopteryx ruficollis	3	Shrubland	Invertivore	Aerial	24.86	115.942	1	11.3043	86.4291	1	28.8855	73.3411	1	20.5666
11_12	Reg_11	Land_12	Stelgidopteryx ruficollis	1	Shrubland	Invertivore	Aerial	27.13	139.13	2	3.76812	149.773	10	4.84115	121.459	21	22.5262
12_15	Reg_12	Land_15	Stelgidopteryx ruficollis	1	Shrubland	Invertivore	Aerial	41.98	179.71	4	6.08696	175.492	5	38.5779	179.666	17	54.6566
12_15	Reg_12	Land_15	Stelgidopteryx ruficollis	1	Shrubland	Invertivore	Aerial	41.98	179.71	4	6.08696	175.492	5	38.5779	179.666	17	54.6566
2_10	Reg_2	Land_10	Stelgidopteryx ruficollis	1	Shrubland	Invertivore	Aerial	103.7	0	0	0	9.1047	1	0.151745	16.6925	2	1.90217
2_8	Reg_2	Land_8	Stelgidopteryx ruficollis	1	Shrubland	Invertivore	Aerial	114.24	127.907	4	2.61628	122.356	11	2.26586	153.309	41	6.86978
3_13	Reg_3	Land_13	Stelgidopteryx ruficollis	1	Shrubland	Invertivore	Aerial	15.88	127.536	2	4.92754	182.094	13	4.77997	199.457	49	22.3128
4_12	Reg_4	Land_12	Stelgidopteryx ruficollis	1	Shrubland	Invertivore	Aerial	159.3	0	0	0	0	0	0	92.4092	28	4.91167
4_6	Reg_4	Land_6	Stelgidopteryx ruficollis	1	Shrubland	Invertivore	Aerial	3.56	470.93	8	17.1512	257.967	16	12.5948	231.277	64	12.5146
5_11	Reg_5	Land_11	Stelgidopteryx ruficollis	1	Shrubland	Invertivore	Aerial	41.57	0	0	0	51.5933	1	11.1533	76.8335	4	12.534
6_13	Reg_6	Land_13	Stelgidopteryx ruficollis	3	Shrubland	Invertivore	Aerial	22.46	139.535	1	19.186	72.8376	1	6.14568	18.6263	1	1.57159
6_15	Reg_6	Land_15	Stelgidopteryx ruficollis	1	Shrubland	Invertivore	Aerial	188.9	0	0	0	0	0	0	3.10559	1	0.11646
6_2	Reg_6	Land_2	Stelgidopteryx ruficollis	2	Shrubland	Invertivore	Aerial	8.09	133.721	1	14.8256	150.342	5	26.6515	127.742	28	31.0037
6_9	Reg_6	Land_9	Stelgidopteryx ruficollis	2	Shrubland	Invertivore	Aerial	28.63	0	0	0	0	0	0	0	0	0
6_9	Reg_6	Land_9	Stelgidopteryx ruficollis	1	Shrubland	Invertivore	Aerial	28.63	0	0	0	0	0	0	0	0	0
7_7	Reg_7	Land_7	Stelgidopteryx ruficollis	2	Shrubland	Invertivore	Aerial	14.2	63.7681	1	4.92754	103.108	2	8.26384	165.697	17	22.0605
8_15	Reg_8	Land_15	Stelgidopteryx ruficollis	1	Shrubland	Invertivore	Aerial	20.7	34.7826	1	0.57971	92.5645	7	5.08346	118.789	23	9.53028
8_3	Reg_8	Land_3	Stelgidopteryx ruficollis	2	Shrubland	Invertivore	Aerial	19.64	244.186	7	4.36047	490.509	35	10.9339	297.03	77	11.0464
8_3	Reg_8	Land_3	Stelgidopteryx ruficollis	1	Shrubland	Invertivore	Aerial	19.64	244.186	7	4.36047	490.509	35	10.9339	297.03	77	11.0464
8_6	Reg_8	Land_6	Stelgidopteryx ruficollis	3	Shrubland	Invertivore	Aerial	15.71	0	0	0	0	0	0	19.0144	1	3.82227
8_7	Reg_8	Land_7	Stelgidopteryx ruficollis	5	Shrubland	Invertivore	Aerial	33.39	110.465	1	17.1512	87.9454	4	32.4488	141.25	20	26.1156
9_3	Reg_9	Land_3	Stelgidopteryx ruficollis	1	Shrubland	Invertivore	Aerial	19.9	313.043	7	11.0145	218.513	9	14.7193	144.354	24	13.6205
9_9	Reg_9	Land_9	Stelgidopteryx ruficollis	1	Shrubland	Invertivore	Aerial	22.06	203.488	3	19.186	213.961	10	44.6889	172.461	36	55.8943
3_12	Reg_3	Land_12	Streptoprocne zonaris	1	Forest	Invertivore	Aerial	22.46	98.5507	1	7.82609	169.954	5	27.8452	190.92	28	41.7734
1_11	Reg_1	Land_11	Synallaxis spixi	1	Shrubland	Invertivore	Insessorial	3.56	244.186	3	49.1279	181.269	8	59.8943	126.14	17	67.2618
12_13	Reg_12	Land_13	Synallaxis spixi	1	Shrubland	Invertivore	Insessorial	130.36	110.145	5	2.31884	225.929	21	4.62472	193.248	58	4.94761
9_10	Reg_9	Land_10	Synallaxis spixi	1	Shrubland	Invertivore	Insessorial	32.73	163.265	4	5.8309	294.609	26	8.88383	300.524	78	19.006
6_8	Reg_6	Land_8	Tachycineta albiventer	1	Riverine	Invertivore	Aerial	45.47	75.5814	1	2.90698	69.4864	1	15.6344	49.2917	1	14.9622
7_13	Reg_7	Land_13	Tachycineta albiventer	9	Riverine	Invertivore	Aerial	92.4	0	0	0	9.08403	2	0.302801	91.9496	10	14.452
1_10	Reg_1	Land_10	Tachycineta leucorrhoa	1	Grassland	Invertivore	Aerial	5.02	156.522	1	8.4058	159.332	11	4.24886	173.525	38	10.0932
1_9	Reg_1	Land_9	Tachycineta leucorrhoa	12	Grassland	Invertivore	Aerial	13.66	226.087	3	21.4493	201.21	3	34.8714	144.05	19	30.6737
2_15	Reg_2	Land_15	Tachycineta leucorrhoa	2	Grassland	Invertivore	Aerial	41.27	81.1594	2	2.6087	183.612	14	6.37329	163.527	37	10.2544
2_15	Reg_2	Land_15	Tachycineta leucorrhoa	1	Grassland	Invertivore	Aerial	41.27	81.1594	2	2.6087	183.612	14	6.37329	163.527	37	10.2544
2_5	Reg_2	Land_5	Tachycineta leucorrhoa	7	Grassland	Invertivore	Aerial	0	0	0	0	19.7269	2	0.531108	92.7795	23	5.2795
2_7	Reg_2	Land_7	Tachycineta leucorrhoa	2	Grassland	Invertivore	Aerial	43.09	87.2093	1	4.94186	192.279	8	15.8213	141.665	21	35.4745
2_8	Reg_2	Land_8	Tachycineta leucorrhoa	3	Grassland	Invertivore	Aerial	114.24	127.907	4	2.61628	122.356	11	2.26586	153.309	41	6.86978
4_15	Reg_4	Land_15	Tachycineta leucorrhoa	1	Grassland	Invertivore	Aerial	30.54	201.149	4	4.02299	171.946	11	3.84615	123.256	27	3.93411
6_12	Reg_6	Land_12	Tachycineta leucorrhoa	1	Grassland	Invertivore	Aerial	28.1	0	0	0	0	0	0	0	0	0
6_12	Reg_6	Land_12	Tachycineta leucorrhoa	1	Grassland	Invertivore	Aerial	28.1	0	0	0	0	0	0	0	0	0
6_13	Reg_6	Land_13	Tachycineta leucorrhoa	1	Grassland	Invertivore	Aerial	22.46	139.535	1	19.186	72.8376	1	6.14568	18.6263	1	1.57159
8_5	Reg_8	Land_5	Tachycineta leucorrhoa	5	Grassland	Invertivore	Aerial	32.39	379.31	10	8.62069	295.626	22	15.6863	266.667	49	21.1434
9_6	Reg_9	Land_6	Tachycineta leucorrhoa	2	Grassland	Invertivore	Aerial	125.76	0	0	0	0	0	0	81.4901	11	11.0206
9_6	Reg_9	Land_6	Tachycineta leucorrhoa	1	Grassland	Invertivore	Aerial	125.76	0	0	0	0	0	0	81.4901	11	11.0206
11_11	Reg_11	Land_11	Tachyphonus coronatus	1	Forest	Invertivore	Insessorial	25.65	180.233	2	28.7791	190.765	7	41.1052	119.2	11	56.7851
2_14	Reg_2	Land_14	Tachyphonus coronatus	1	Forest	Invertivore	Insessorial	9.4	162.791	1	18.314	127.466	3	11.6085	103.421	13	10.9448
2_5	Reg_2	Land_5	Tachyphonus coronatus	1	Forest	Invertivore	Insessorial	0	0	0	0	19.7269	2	0.531108	92.7795	23	5.2795
4_5	Reg_4	Land_5	Tachyphonus coronatus	1	Forest	Invertivore	Insessorial	5.02	201.149	1	40.2299	182.504	5	22.2474	165.891	32	10.1938
5_7	Reg_5	Land_7	Tachyphonus coronatus	1	Forest	Invertivore	Insessorial	0	34.8837	1	0.581395	69.8027	5	1.44158	97.4568	26	6.05708
8_1	Reg_8	Land_1	Tachyphonus coronatus	1	Forest	Invertivore	Insessorial	213.56	28.9855	1	0.869565	33.3586	3	0.833965	35.3124	13	0.756694
8_3	Reg_8	Land_3	Tachyphonus coronatus	3	Forest	Invertivore	Insessorial	19.64	244.186	7	4.36047	490.509	35	10.9339	297.03	77	11.0464
11_14	Reg_11	Land_14	Tangara cayana	3	Forest	Frugivore	Insessorial	15.88	144.928	2	15.0725	153.263	4	45.5235	105.652	6	58.7881
12_13	Reg_12	Land_13	Tangara cayana	1	Forest	Frugivore	Insessorial	130.36	110.145	5	2.31884	225.929	21	4.62472	193.248	58	4.94761
12_8	Reg_12	Land_8	Tangara cayana	2	Forest	Frugivore	Insessorial	18.1	141.593	1	23.3038	136.674	2	13.2118	92.7975	8	11.7841
3_2	Reg_3	Land_2	Tangara cayana	1	Forest	Frugivore	Insessorial	7.58	387.097	7	29.3255	336.874	21	31.4871	201.048	49	41.3546
3_5	Reg_3	Land_5	Tangara cayana	2	Forest	Frugivore	Insessorial	6.3	174.927	4	7.28863	195.9	11	35.2316	144.438	21	49.3302
3_6	Reg_3	Land_6	Tangara cayana	2	Forest	Frugivore	Insessorial	71.91	93.0233	3	1.45349	90.8403	9	5.45042	129.195	27	15.3637
4_15	Reg_4	Land_15	Tangara cayana	1	Forest	Frugivore	Insessorial	30.54	201.149	4	4.02299	171.946	11	3.84615	123.256	27	3.93411
4_6	Reg_4	Land_6	Tangara cayana	2	Forest	Frugivore	Insessorial	3.56	470.93	8	17.1512	257.967	16	12.5948	231.277	64	12.5146
5_1	Reg_5	Land_1	Tangara cayana	1	Forest	Frugivore	Insessorial	5.02	295.652	2	37.1014	170.953	6	24.8109	163.368	32	10.6131
6_8	Reg_6	Land_8	Tangara cayana	2	Forest	Frugivore	Insessorial	45.47	75.5814	1	2.90698	69.4864	1	15.6344	49.2917	1	14.9622
2_14	Reg_2	Land_14	Tangara palmarum	2	Forest	Omnivore	Insessorial	9.4	162.791	1	18.314	127.466	3	11.6085	103.421	13	10.9448
2_5	Reg_2	Land_5	Tangara palmarum	3	Forest	Omnivore	Insessorial	0	0	0	0	19.7269	2	0.531108	92.7795	23	5.2795
4_4	Reg_4	Land_4	Tangara palmarum	3	Forest	Omnivore	Insessorial	63.51	360.465	7	8.13953	248.862	16	7.20789	142.026	31	5.82072
1_13	Reg_1	Land_13	Tangara sayaca	1	Forest	Frugivore	Insessorial	6.54	237.681	4	20.2899	200.303	3	25.2656	142.414	16	14.8816
1_5	Reg_1	Land_5	Tangara sayaca	1	Forest	Frugivore	Insessorial	9.52	430.233	8	23.5465	429.439	15	21.6237	268.402	38	20.1398
1_5	Reg_1	Land_5	Tangara sayaca	1	Forest	Frugivore	Insessorial	9.52	430.233	8	23.5465	429.439	15	21.6237	268.402	38	20.1398
1_5	Reg_1	Land_5	Tangara sayaca	2	Forest	Frugivore	Insessorial	9.52	430.233	8	23.5465	429.439	15	21.6237	268.402	38	20.1398
1_6	Reg_1	Land_6	Tangara sayaca	3	Forest	Frugivore	Insessorial	37.06	162.791	4	8.13953	136.26	6	16.8055	146.266	23	11.4452
1_6	Reg_1	Land_6	Tangara sayaca	1	Forest	Frugivore	Insessorial	37.06	162.791	4	8.13953	136.26	6	16.8055	146.266	23	11.4452
10_1	Reg_10	Land_1	Tangara sayaca	1	Forest	Frugivore	Insessorial	27.73	34.8837	1	2.03488	63.6846	1	8.64291	77.6096	10	5.6849
10_6	Reg_10	Land_6	Tangara sayaca	2	Forest	Frugivore	Insessorial	15.06	93.0233	1	9.30233	72.8376	1	10.8498	42.7683	1	5.55988
11_1	Reg_11	Land_1	Tangara sayaca	1	Forest	Frugivore	Insessorial	31.73	98.8372	2	4.36047	151.745	4	21.2443	108.717	5	33.1974
11_14	Reg_11	Land_14	Tangara sayaca	1	Forest	Frugivore	Insessorial	15.88	144.928	2	15.0725	153.263	4	45.5235	105.652	6	58.7881
11_2	Reg_11	Land_2	Tangara sayaca	1	Forest	Frugivore	Insessorial	28.76	98.8372	1	8.72093	68.3371	1	27.4108	128.519	15	23.9371
12_15	Reg_12	Land_15	Tangara sayaca	1	Forest	Frugivore	Insessorial	41.98	179.71	4	6.08696	175.492	5	38.5779	179.666	17	54.6566
2_11	Reg_2	Land_11	Tangara sayaca	1	Forest	Frugivore	Insessorial	14.86	272.464	2	37.1014	207.733	6	36.0121	142.414	16	37.4854
2_11	Reg_2	Land_11	Tangara sayaca	1	Forest	Frugivore	Insessorial	14.86	272.464	2	37.1014	207.733	6	36.0121	142.414	16	37.4854
2_12	Reg_2	Land_12	Tangara sayaca	3	Forest	Frugivore	Insessorial	35.77	197.101	5	12.4638	261.725	14	17.3222	222.093	49	11.2017
2_12	Reg_2	Land_12	Tangara sayaca	4	Forest	Frugivore	Insessorial	35.77	197.101	5	12.4638	261.725	14	17.3222	222.093	49	11.2017
2_13	Reg_2	Land_13	Tangara sayaca	2	Forest	Frugivore	Insessorial	8	215.116	5	9.30233	139.605	8	8.5736	148.523	31	9.79782
2_14	Reg_2	Land_14	Tangara sayaca	3	Forest	Frugivore	Insessorial	9.4	162.791	1	18.314	127.466	3	11.6085	103.421	13	10.9448
2_2	Reg_2	Land_2	Tangara sayaca	5	Forest	Frugivore	Insessorial	148.14	167.63	4	3.17919	55.9335	5	1.0582	51.9884	17	1.00873
2_3	Reg_2	Land_3	Tangara sayaca	3	Forest	Frugivore	Insessorial	214.58	153.392	5	2.94985	92.6348	9	1.74639	47.3694	16	0.834789
2_4	Reg_2	Land_4	Tangara sayaca	2	Forest	Frugivore	Insessorial	211.22	0	0	0	4.55235	1	0.0758725	43.0901	14	0.834627
3_1	Reg_3	Land_1	Tangara sayaca	1	Forest	Frugivore	Insessorial	126.47	115.942	4	1.73913	75.815	11	1.28886	133.101	47	3.06558
3_11	Reg_3	Land_11	Tangara sayaca	2	Forest	Frugivore	Insessorial	28.69	275.66	2	27.2727	201.821	4	34.9014	176.984	15	45.5657
3_11	Reg_3	Land_11	Tangara sayaca	2	Forest	Frugivore	Insessorial	28.69	275.66	2	27.2727	201.821	4	34.9014	176.984	15	45.5657
3_8	Reg_3	Land_8	Tangara sayaca	2	Forest	Frugivore	Insessorial	40.12	68.9655	2	1.14943	119.155	9	15.3846	130.233	24	36.938
4_1	Reg_4	Land_1	Tangara sayaca	1	Forest	Frugivore	Insessorial	11.11	115.942	1	15.3623	107.739	2	23.4446	109.147	2	30.6079
4_10	Reg_4	Land_10	Tangara sayaca	3	Forest	Frugivore	Insessorial	11.56	532.164	9	15.2047	251.897	21	5.84219	133.929	38	3.26087
4_10	Reg_4	Land_10	Tangara sayaca	2	Forest	Frugivore	Insessorial	11.56	532.164	9	15.2047	251.897	21	5.84219	133.929	38	3.26087
4_13	Reg_4	Land_13	Tangara sayaca	1	Forest	Frugivore	Insessorial	48.4	58.1395	2	1.16279	121.12	5	13.4746	135.015	33	20.4074
4_4	Reg_4	Land_4	Tangara sayaca	6	Forest	Frugivore	Insessorial	63.51	360.465	7	8.13953	248.862	16	7.20789	142.026	31	5.82072
4_6	Reg_4	Land_6	Tangara sayaca	2	Forest	Frugivore	Insessorial	3.56	470.93	8	17.1512	257.967	16	12.5948	231.277	64	12.5146
4_9	Reg_4	Land_9	Tangara sayaca	1	Forest	Frugivore	Insessorial	45.13	127.907	3	2.03488	106.222	9	1.89681	112.922	32	2.96857
5_1	Reg_5	Land_1	Tangara sayaca	1	Forest	Frugivore	Insessorial	5.02	295.652	2	37.1014	170.953	6	24.8109	163.368	32	10.6131
5_6	Reg_5	Land_6	Tangara sayaca	1	Forest	Frugivore	Insessorial	33.37	139.535	4	6.39535	125.378	5	5.13595	123.035	21	5.49195
5_6	Reg_5	Land_6	Tangara sayaca	1	Forest	Frugivore	Insessorial	33.37	139.535	4	6.39535	125.378	5	5.13595	123.035	21	5.49195
5_8	Reg_5	Land_8	Tangara sayaca	1	Forest	Frugivore	Insessorial	62.11	246.334	2	8.5044	229.135	12	6.9044	252.28	44	14.2829
5_8	Reg_5	Land_8	Tangara sayaca	4	Forest	Frugivore	Insessorial	62.11	246.334	2	8.5044	229.135	12	6.9044	252.28	44	14.2829
5_9	Reg_5	Land_9	Tangara sayaca	1	Forest	Frugivore	Insessorial	26.2	215.116	4	8.13953	285.281	8	32.4734	192.972	21	25.5484
8_11	Reg_8	Land_11	Tangara sayaca	1	Forest	Frugivore	Insessorial	32.7	313.953	6	25	283.333	20	26.1364	299.573	72	21.1098
8_14	Reg_8	Land_14	Tangara sayaca	1	Forest	Frugivore	Insessorial	28.76	338.192	7	21.5743	321.944	19	35.1557	231.023	49	33.4498
8_2	Reg_8	Land_2	Tangara sayaca	2	Forest	Frugivore	Insessorial	509.54	0	0	0	0	0	0	0	0	0
8_8	Reg_8	Land_8	Tangara sayaca	2	Forest	Frugivore	Insessorial	184.8	0	0	0	0	0	0	22.1402	2	1.34007
9_11	Reg_9	Land_11	Tangara sayaca	1	Forest	Frugivore	Insessorial	5.02	542.274	4	44.6064	275.132	12	60.2419	219.72	31	45.7686
9_7	Reg_9	Land_7	Tangara sayaca	1	Forest	Frugivore	Insessorial	21.36	330.383	5	27.4336	205.011	10	44.7229	242.671	37	44.205
9_8	Reg_9	Land_8	Tangara sayaca	3	Forest	Frugivore	Insessorial	25.41	249.275	4	18.5507	247.344	7	56.9803	156.535	18	73.4512
11_7	Reg_11	Land_7	Tersina viridis	1	Forest	Frugivore	Insessorial	37.48	75.8017	1	3.49854	208.049	3	35.0797	161.91	1	50.2621
2_14	Reg_2	Land_14	Tersina viridis	2	Forest	Frugivore	Insessorial	9.4	162.791	1	18.314	127.466	3	11.6085	103.421	13	10.9448
11_5	Reg_11	Land_5	Thalurania glaucopis	1	Forest	Nectarivore	Aerial	24.24	308.14	2	38.6628	154.663	4	47.0053	148.234	10	45.6733
2_5	Reg_2	Land_5	Theristicus caudatus	5	Grassland	Omnivore	Terrestrial	0	0	0	0	19.7269	2	0.531108	92.7795	23	5.2795
6_13	Reg_6	Land_13	Thlypopsis sordida	1	Forest	Omnivore	Insessorial	22.46	139.535	1	19.186	72.8376	1	6.14568	18.6263	1	1.57159
1_5	Reg_1	Land_5	Trichothraupis melanops	1	Forest	Invertivore	Insessorial	9.52	430.233	8	23.5465	429.439	15	21.6237	268.402	38	20.1398
6_9	Reg_6	Land_9	Trichothraupis melanops	1	Forest	Invertivore	Insessorial	28.63	0	0	0	0	0	0	0	0	0
8_5	Reg_8	Land_5	Trichothraupis melanops	1	Forest	Invertivore	Insessorial	32.39	379.31	10	8.62069	295.626	22	15.6863	266.667	49	21.1434
12_12	Reg_12	Land_12	Troglodytes aedon	1	Shrubland	Invertivore	Insessorial	22.46	145.349	1	11.6279	193.939	8	18.3333	140.473	31	16.8801
3_12	Reg_3	Land_12	Troglodytes aedon	1	Shrubland	Invertivore	Insessorial	22.46	98.5507	1	7.82609	169.954	5	27.8452	190.92	28	41.7734
10_6	Reg_10	Land_6	Turdus amaurochalinus	1	Forest	Invertivore	Insessorial	15.06	93.0233	1	9.30233	72.8376	1	10.8498	42.7683	1	5.55988
10_6	Reg_10	Land_6	Turdus amaurochalinus	1	Forest	Invertivore	Insessorial	15.06	93.0233	1	9.30233	72.8376	1	10.8498	42.7683	1	5.55988
10_6	Reg_10	Land_6	Turdus amaurochalinus	1	Forest	Invertivore	Insessorial	15.06	93.0233	1	9.30233	72.8376	1	10.8498	42.7683	1	5.55988
10_7	Reg_10	Land_7	Turdus amaurochalinus	1	Forest	Invertivore	Insessorial	95.6	0	0	0	0	0	0	43.4698	2	5.95769
10_8	Reg_10	Land_8	Turdus amaurochalinus	1	Forest	Invertivore	Insessorial	17.47	191.86	1	30.814	131.918	1	31.3116	59.7594	1	17.5398
10_8	Reg_10	Land_8	Turdus amaurochalinus	1	Forest	Invertivore	Insessorial	17.47	191.86	1	30.814	131.918	1	31.3116	59.7594	1	17.5398
2_14	Reg_2	Land_14	Turdus amaurochalinus	1	Forest	Invertivore	Insessorial	9.4	162.791	1	18.314	127.466	3	11.6085	103.421	13	10.9448
11_11	Reg_11	Land_11	Turdus leucomelas	1	Forest	Frugivore	Insessorial	25.65	180.233	2	28.7791	190.765	7	41.1052	119.2	11	56.7851
11_2	Reg_11	Land_2	Turdus leucomelas	1	Forest	Frugivore	Insessorial	28.76	98.8372	1	8.72093	68.3371	1	27.4108	128.519	15	23.9371
12_6	Reg_12	Land_6	Turdus leucomelas	1	Forest	Frugivore	Insessorial	0	52.3256	2	0.872093	74.4115	6	3.49279	114.153	16	16.3658
4_8	Reg_4	Land_8	Turdus leucomelas	2	Forest	Frugivore	Insessorial	65.28	127.907	3	2.90698	146.97	17	2.87879	201.009	39	20.0233
12_6	Reg_12	Land_6	Tyrannus melancholicus	2	Human Modified	Invertivore	Insessorial	0	52.3256	2	0.872093	74.4115	6	3.49279	114.153	16	16.3658
2_3	Reg_2	Land_3	Tyrannus melancholicus	1	Human Modified	Invertivore	Insessorial	214.58	153.392	5	2.94985	92.6348	9	1.74639	47.3694	16	0.834789
2_3	Reg_2	Land_3	Tyrannus savana	1	Grassland	Invertivore	Insessorial	214.58	153.392	5	2.94985	92.6348	9	1.74639	47.3694	16	0.834789
2_4	Reg_2	Land_4	Tyrannus savana	1	Grassland	Invertivore	Insessorial	211.22	0	0	0	4.55235	1	0.0758725	43.0901	14	0.834627
1_8	Reg_1	Land_8	Vanellus chilensis	1	Grassland	Omnivore	Terrestrial	138.26	0	0	0	36.4188	3	0.682853	81.5376	19	11.9006
11_9	Reg_11	Land_9	Vanellus chilensis	3	Grassland	Omnivore	Terrestrial	9.66	0	0	0	61.9803	5	1.88964	103.201	24	3.23957
6_7	Reg_6	Land_7	Vanellus chilensis	1	Grassland	Omnivore	Terrestrial	34.93	0	0	0	21.2604	2	0.835232	52.0287	7	9.66803
7_15	Reg_7	Land_15	Vanellus chilensis	1	Grassland	Omnivore	Terrestrial	17.1	171.091	1	30.3835	136.674	1	27.0311	79.5962	1	13.8808
7_5	Reg_7	Land_5	Vanellus chilensis	1	Grassland	Omnivore	Terrestrial	5.73	285.714	6	8.45481	156.416	10	5.31511	75.7135	19	2.09668
7_9	Reg_7	Land_9	Vanellus chilensis	1	Grassland	Omnivore	Terrestrial	0	156.977	1	53.7791	115.064	1	31.2642	99.3596	10	20.9393
7_9	Reg_7	Land_9	Vanellus chilensis	2	Grassland	Omnivore	Terrestrial	0	156.977	1	53.7791	115.064	1	31.2642	99.3596	10	20.9393
8_12	Reg_8	Land_12	Vanellus chilensis	2	Grassland	Omnivore	Terrestrial	231.57	0	0	0	0	0	0	15.1427	5	0.388274
8_15	Reg_8	Land_15	Vanellus chilensis	2	Grassland	Omnivore	Terrestrial	20.7	34.7826	1	0.57971	92.5645	7	5.08346	118.789	23	9.53028
10_10	Reg_10	Land_10	Xolmis irupero	1	Human Modified	Invertivore	Insessorial	54.57	0	0	0	48.2655	1	4.0724	43.0233	1	7.5
1_12	Reg_1	Land_12	Xolmis velatus	1	Shrubland	Invertivore	Insessorial	72.3	0	0	0	146.858	10	5.22332	183.654	31	27.7228
1_4	Reg_1	Land_4	Xolmis velatus	1	Shrubland	Invertivore	Insessorial	84.34	23.2558	1	0.581395	113.809	8	6.60091	90.4679	19	15.4145
10_14	Reg_10	Land_14	Xolmis velatus	1	Shrubland	Invertivore	Insessorial	40.7	0	0	0	86.5604	2	17.9954	51.2522	3	26.325
10_14	Reg_10	Land_14	Xolmis velatus	1	Shrubland	Invertivore	Insessorial	40.7	0	0	0	86.5604	2	17.9954	51.2522	3	26.325
12_15	Reg_12	Land_15	Xolmis velatus	1	Shrubland	Invertivore	Insessorial	41.98	179.71	4	6.08696	175.492	5	38.5779	179.666	17	54.6566
2_2	Reg_2	Land_2	Xolmis velatus	1	Shrubland	Invertivore	Insessorial	148.14	167.63	4	3.17919	55.9335	5	1.0582	51.9884	17	1.00873
2_8	Reg_2	Land_8	Xolmis velatus	1	Shrubland	Invertivore	Insessorial	114.24	127.907	4	2.61628	122.356	11	2.26586	153.309	41	6.86978
3_13	Reg_3	Land_13	Xolmis velatus	1	Shrubland	Invertivore	Insessorial	15.88	127.536	2	4.92754	182.094	13	4.77997	199.457	49	22.3128
3_14	Reg_3	Land_14	Xolmis velatus	1	Shrubland	Invertivore	Insessorial	33.76	151.163	2	10.7558	165.026	9	19.9849	160.745	32	31.9744
5_6	Reg_5	Land_6	Xolmis velatus	1	Shrubland	Invertivore	Insessorial	33.37	139.535	4	6.39535	125.378	5	5.13595	123.035	21	5.49195
6_10	Reg_6	Land_10	Xolmis velatus	1	Shrubland	Invertivore	Insessorial	200.37	0	0	0	0	0	0	0.776548	1	0.0194137
6_10	Reg_6	Land_10	Xolmis velatus	1	Shrubland	Invertivore	Insessorial	200.37	0	0	0	0	0	0	0.776548	1	0.0194137
1_13	Reg_1	Land_13	Zenaida auriculata	1	Human Modified	Granivore	Terrestrial	6.54	237.681	4	20.2899	200.303	3	25.2656	142.414	16	14.8816
10_7	Reg_10	Land_7	Zenaida auriculata	1	Human Modified	Granivore	Terrestrial	95.6	0	0	0	0	0	0	43.4698	2	5.95769
10_7	Reg_10	Land_7	Zenaida auriculata	2	Human Modified	Granivore	Terrestrial	95.6	0	0	0	0	0	0	43.4698	2	5.95769
10_7	Reg_10	Land_7	Zenaida auriculata	3	Human Modified	Granivore	Terrestrial	95.6	0	0	0	0	0	0	43.4698	2	5.95769
10_7	Reg_10	Land_7	Zenaida auriculata	1	Human Modified	Granivore	Terrestrial	95.6	0	0	0	0	0	0	43.4698	2	5.95769
10_9	Reg_10	Land_9	Zenaida auriculata	5	Human Modified	Granivore	Terrestrial	24.86	115.942	1	11.3043	86.4291	1	28.8855	73.3411	1	20.5666
12_10	Reg_12	Land_10	Zenaida auriculata	2	Human Modified	Granivore	Terrestrial	11.11	211.144	3	24.6334	168.437	6	43.5508	132.35	21	50.8442
2_15	Reg_2	Land_15	Zenaida auriculata	1	Human Modified	Granivore	Terrestrial	41.27	81.1594	2	2.6087	183.612	14	6.37329	163.527	37	10.2544
2_8	Reg_2	Land_8	Zenaida auriculata	3	Human Modified	Granivore	Terrestrial	114.24	127.907	4	2.61628	122.356	11	2.26586	153.309	41	6.86978
4_12	Reg_4	Land_12	Zenaida auriculata	3	Human Modified	Granivore	Terrestrial	159.3	0	0	0	0	0	0	92.4092	28	4.91167
4_14	Reg_4	Land_14	Zenaida auriculata	1	Human Modified	Granivore	Terrestrial	85.3	162.319	5	2.89855	183.612	17	3.64188	183.618	43	11.6848
4_2	Reg_4	Land_2	Zenaida auriculata	2	Human Modified	Granivore	Terrestrial	51.85	0	0	0	40.8781	1	5.82892	57.42	3	11.9884
4_5	Reg_4	Land_5	Zenaida auriculata	1	Human Modified	Granivore	Terrestrial	5.02	201.149	1	40.2299	182.504	5	22.2474	165.891	32	10.1938
5_12	Reg_5	Land_12	Zenaida auriculata	2	Human Modified	Granivore	Terrestrial	19.19	103.448	1	10.9195	102.564	1	20.6637	86.8217	1	19.7093
5_7	Reg_5	Land_7	Zenaida auriculata	2	Human Modified	Granivore	Terrestrial	0	34.8837	1	0.581395	69.8027	5	1.44158	97.4568	26	6.05708
6_12	Reg_6	Land_12	Zenaida auriculata	2	Human Modified	Granivore	Terrestrial	28.1	0	0	0	0	0	0	0	0	0
1_9	Reg_1	Land_9	Zonotrichia capensis	1	Shrubland	Omnivore	Generalist	13.66	226.087	3	21.4493	201.21	3	34.8714	144.05	19	30.6737
10_2	Reg_10	Land_2	Zonotrichia capensis	1	Shrubland	Omnivore	Generalist	38.4	169.591	2	6.14035	94.0819	3	5.38695	129.27	15	16.4208
10_6	Reg_10	Land_6	Zonotrichia capensis	1	Shrubland	Omnivore	Generalist	15.06	93.0233	1	9.30233	72.8376	1	10.8498	42.7683	1	5.55988
10_7	Reg_10	Land_7	Zonotrichia capensis	1	Shrubland	Omnivore	Generalist	95.6	0	0	0	0	0	0	43.4698	2	5.95769
11_1	Reg_11	Land_1	Zonotrichia capensis	7	Shrubland	Omnivore	Generalist	31.73	98.8372	2	4.36047	151.745	4	21.2443	108.717	5	33.1974
11_12	Reg_11	Land_12	Zonotrichia capensis	3	Shrubland	Omnivore	Generalist	27.13	139.13	2	3.76812	149.773	10	4.84115	121.459	21	22.5262
11_12	Reg_11	Land_12	Zonotrichia capensis	1	Shrubland	Omnivore	Generalist	27.13	139.13	2	3.76812	149.773	10	4.84115	121.459	21	22.5262
12_12	Reg_12	Land_12	Zonotrichia capensis	1	Shrubland	Omnivore	Generalist	22.46	145.349	1	11.6279	193.939	8	18.3333	140.473	31	16.8801
12_13	Reg_12	Land_13	Zonotrichia capensis	4	Shrubland	Omnivore	Generalist	130.36	110.145	5	2.31884	225.929	21	4.62472	193.248	58	4.94761
12_5	Reg_12	Land_5	Zonotrichia capensis	1	Shrubland	Omnivore	Generalist	79.86	0	0	0	52.9501	7	0.983359	95.0718	20	10.1669
3_14	Reg_3	Land_14	Zonotrichia capensis	1	Shrubland	Omnivore	Generalist	33.76	151.163	2	10.7558	165.026	9	19.9849	160.745	32	31.9744
3_2	Reg_3	Land_2	Zonotrichia capensis	2	Shrubland	Omnivore	Generalist	7.58	387.097	7	29.3255	336.874	21	31.4871	201.048	49	41.3546
3_3	Reg_3	Land_3	Zonotrichia capensis	2	Shrubland	Omnivore	Generalist	33.38	115.942	1	13.3333	175.492	5	40.8472	196.352	22	44.4315
3_4	Reg_3	Land_4	Zonotrichia capensis	3	Shrubland	Omnivore	Generalist	23.1	306.785	9	6.78466	382.688	33	7.66894	201.514	38	57.3675
3_5	Reg_3	Land_5	Zonotrichia capensis	1	Shrubland	Omnivore	Generalist	6.3	174.927	4	7.28863	195.9	11	35.2316	144.438	21	49.3302
4_13	Reg_4	Land_13	Zonotrichia capensis	1	Shrubland	Omnivore	Generalist	48.4	58.1395	2	1.16279	121.12	5	13.4746	135.015	33	20.4074
4_15	Reg_4	Land_15	Zonotrichia capensis	1	Shrubland	Omnivore	Generalist	30.54	201.149	4	4.02299	171.946	11	3.84615	123.256	27	3.93411
4_8	Reg_4	Land_8	Zonotrichia capensis	2	Shrubland	Omnivore	Generalist	65.28	127.907	3	2.90698	146.97	17	2.87879	201.009	39	20.0233
5_6	Reg_5	Land_6	Zonotrichia capensis	1	Shrubland	Omnivore	Generalist	33.37	139.535	4	6.39535	125.378	5	5.13595	123.035	21	5.49195
5_8	Reg_5	Land_8	Zonotrichia capensis	2	Shrubland	Omnivore	Generalist	62.11	246.334	2	8.5044	229.135	12	6.9044	252.28	44	14.2829
6_11	Reg_6	Land_11	Zonotrichia capensis	1	Shrubland	Omnivore	Generalist	31.32	0	0	0	0	0	0	0	0	0
6_13	Reg_6	Land_13	Zonotrichia capensis	1	Shrubland	Omnivore	Generalist	22.46	139.535	1	19.186	72.8376	1	6.14568	18.6263	1	1.57159
7_3	Reg_7	Land_3	Zonotrichia capensis	1	Shrubland	Omnivore	Generalist	0	162.791	4	3.19767	90.8403	8	1.5897	35.7074	12	0.853872
8_10	Reg_8	Land_10	Zonotrichia capensis	2	Shrubland	Omnivore	Generalist	30.21	175.953	3	3.22581	197.269	15	8.27011	229.381	61	18.1254
8_11	Reg_8	Land_11	Zonotrichia capensis	1	Shrubland	Omnivore	Generalist	32.7	313.953	6	25	283.333	20	26.1364	299.573	72	21.1098
9_12	Reg_9	Land_12	Zonotrichia capensis	1	Shrubland	Omnivore	Generalist	38.76	232.558	8	6.97674	298.938	20	14.9469	206.83	38	32.111
9_4	Reg_9	Land_4	Zonotrichia capensis	1	Shrubland	Omnivore	Generalist	73.56	0	0	0	60.4686	2	5.51776	130.747	18	13.9864
9_8	Reg_9	Land_8	Zonotrichia capensis	1	Shrubland	Omnivore	Generalist	25.41	249.275	4	18.5507	247.344	7	56.9803	156.535	18	73.4512

## Sheet: Table S3 dataset_trajectory
traj_id	region	landscape	species_birdlife	abundance	habitat	trophic_niche	primary_lifestyle	Total distance traveled	Sinuosity index	area_ha_buffer50m	ed_50	pland_50	patch_density_50	area_ha_buffer100m	ed_100	pland_100	patch density_100
1	Reg_2	Land_1	Bubulcus ibis	5	Human Modified	Omnivore	Terrestrial	168.318	1.01285	2.455	53.0303	0.94697	1.62933	6.48933	47.3198	0.850277	1.23279
2	Reg_2	Land_1	Sicalis flaveola	2	Shrubland	Granivore	Terrestrial	112.536	1.04006	1.896	62.8779	1.20919	2.1097	5.36936	30.2626	0.534045	0.744968
3	Reg_2	Land_1	Sicalis flaveola	2	Shrubland	Granivore	Terrestrial	109.648	1.17984	1.84	60.6827	1.26422	2.17391	5.22212	31.3509	0.55325	0.765972
4	Reg_2	Land_1	Brotogeris chiriri	5	Forest	Omnivore	Insessorial	76.5846	1.0665	1.534	0	0	0	4.64099	28.7327	0.513084	0.646414
5	Reg_2	Land_1	Psarocolius decumanus	1	Forest	Omnivore	Insessorial	117.218	1.09273	1.927	0	0	0	5.42302	40.7621	0.753212	0.921996
6	Reg_2	Land_1	Patagioenas picazuro	2	Forest	Omnivore	Generalist	178.278	1.167	2.533	0	0	0	6.60422	0	0	0
7	Reg_2	Land_1	Patagioenas picazuro	1	Forest	Omnivore	Generalist	129.388	1.10098	2.041	60.7424	1.12486	1.46987	5.63341	50.6757	0.971284	1.4201
8	Reg_2	Land_4	Sicalis flaveola	1	Shrubland	Granivore	Terrestrial	113.76	1.02462	1.908	0	0	0	5.39698	31.0009	0.620018	1.11173
9	Reg_2	Land_4	Psittacara leucophthalmus	3	Forest	Omnivore	Insessorial	40.3126	1.15262	1.16	109.375	2.14844	4.31034	3.88739	86.744	1.52718	2.57242
10	Reg_2	Land_4	Tyrannus savana	1	Grassland	Invertivore	Insessorial	62.3122	1.02283	1.393	0	0	0	4.36794	0	0	0
11	Reg_2	Land_4	Sicalis flaveola	2	Shrubland	Granivore	Terrestrial	71.4954	1.0627	1.48	0	0	0	4.53564	13.7203	0.263852	0.661429
12	Reg_2	Land_4	Patagioenas picazuro	2	Forest	Omnivore	Generalist	74.5601	1.13722	1.5	12.3457	0.462963	0.666667	4.56247	48.294	0.892388	1.31508
13	Reg_2	Land_4	Sicalis flaveola	1	Shrubland	Granivore	Terrestrial	66.3523	1.12577	1.416	0	0	0	4.39339	17.316	0.324675	0.910459
14	Reg_2	Land_4	Patagioenas picazuro	1	Forest	Omnivore	Generalist	147.176	1.03092	2.24	0	0	0	6.05198	30.83	0.592885	0.991412
15	Reg_2	Land_4	Tangara sayaca	2	Forest	Omnivore	Insessorial	68.6741	1.30686	1.42	0	0	0	4.38966	0	0	0
16	Reg_2	Land_4	Sicalis flaveola	1	Shrubland	Granivore	Terrestrial	116.228	1.01792	1.932	0	0	0	5.44884	36.9718	0.704225	1.28468
17	Reg_2	Land_5	Trochilidae	1	NA	Nectarivore	NA	28.4725	1.14912	1.045	0	0	0	3.6697	10.3761	0.194553	0.545003
18	Reg_2	Land_5	Theristicus caudatus	5	Grassland	Omnivore	Terrestrial	127.329	1.37419	1.901	14.6163	0.243605	0.526039	5.27116	30.9654	0.591985	0.948558
19	Reg_2	Land_5	Patagioenas picazuro	2	Forest	Omnivore	Generalist	73.902	1.08178	1.489	18.5759	0.309598	0.671592	4.5456	9.45875	0.157646	0.439985
20	Reg_2	Land_5	Tangara palmarum	3	Forest	Omnivore	Insessorial	46.1864	1.39234	1.15	0	0	0	3.86973	7.40741	0.123457	0.258416
21	Reg_2	Land_5	Tachycineta leucorrhoa	7	Grassland	Invertivore	Aerial	150.666	1.00944	2.28	24.2915	0.607287	0.877193	6.14253	45.9681	0.895988	1.30239
22	Reg_2	Land_5	Sporophila caerulescens	1	Shrubland	Granivore	Generalist	30.0016	1.01072	1.073	0	0	0	3.72867	11.4213	0.253807	0.536384
23	Reg_2	Land_5	Sporophila nigricollis	2	Shrubland	Granivore	Insessorial	49.7957	1.57249	1.213	22.5564	0.37594	0.824402	3.97813	7.18133	0.119689	0.251374
24	Reg_2	Land_5	Spinus magellanicus	1	Shrubland	Granivore	Insessorial	62.3567	1.87581	1.278	21.5054	0.358423	0.782473	4.1069	10.4469	0.232153	0.486985
25	Reg_2	Land_5	Tachyphonus coronatus	1	Forest	Invertivore	Insessorial	25.2829	1.0259	1.023	0	0	0	3.6306	16.9824	0.457218	0.550874
26	Reg_2	Land_5	Spinus magellanicus	2	Shrubland	Granivore	Insessorial	23.1039	1.39662	0.978	9.13242	0.228311	1.02249	3.53306	8.03751	0.133958	0.283041
27	Reg_2	Land_5	Sporophila caerulescens	2	Shrubland	Granivore	Generalist	22.283	1.03598	0.992	0	0	0	3.56803	13.3156	0.332889	0.560533
28	Reg_2	Land_6	Dacnis cayana	1	Forest	Frugivore	Insessorial	88.7189	1.14682	1.6	171.92	67.6218	1.875	4.76606	133.067	66.5333	0.839267
29	Reg_2	Land_6	Trochilidae	1	NA	Nectarivore	NA	94.5099	1.07787	1.696	189.702	60.1626	1.76887	4.95902	134.429	62.3308	0.80661
30	Reg_2	Land_6	Trochilidae	1	NA	Nectarivore	NA	103.335	1.07781	1.785	198.454	53.6082	1.68067	5.13982	139.211	59.0719	1.16736
31	Reg_2	Land_7	Aratinga auricapillus	1	Forest	Omnivore	Insessorial	96.2671	1.0247	1.732	133.156	8.52197	2.88684	5.04505	161.52	18.2423	1.98214
32	Reg_2	Land_7	Psittacara leucophthalmus	10	Forest	Omnivore	Insessorial	121.066	1.01672	1.98	109.942	3.27485	2.0202	5.54262	169.477	17.2503	2.88672
33	Reg_2	Land_7	Psittacara leucophthalmus	4	Forest	Omnivore	Insessorial	160.615	1.464	2.256	143.59	4.10256	3.5461	5.97085	172.899	19.1797	2.5122
34	Reg_2	Land_7	Columba livia	1	Human Modified	Granivore	Terrestrial	99.8295	1.06111	1.766	230.971	11.811	2.26501	5.10073	207.059	31.8588	2.15656
35	Reg_2	Land_7	Psittacara leucophthalmus	11	Forest	Omnivore	Insessorial	115.673	1.08069	1.92	285.03	25.0299	2.08333	5.41058	187.445	39.3457	1.66341
36	Reg_2	Land_7	Eupetomena macroura	1	Shrubland	Nectarivore	Aerial	124.548	1.42226	1.758	78.4314	4.70588	2.27531	5.05602	158.865	7.89598	2.57119
37	Reg_2	Land_7	Tachycineta leucorrhoa	2	Grassland	Invertivore	Aerial	77.4305	1.14573	1.532	132.53	8.43373	1.95822	4.62535	168.301	21.0635	1.9458
38	Reg_2	Land_9	Patagioenas picazuro	1	Forest	Omnivore	Generalist	103.811	1.01022	1.811	96.8153	42.4204	0.552181	5.2056	85.5172	45.6552	0.576303
39	Reg_2	Land_9	Psarocolius decumanus	1	Forest	Omnivore	Insessorial	108.135	1.03029	1.851	100.125	36.4205	1.0805	5.28113	78.9116	44.0363	0.56806
40	Reg_2	Land_9	Patagioenas picazuro	7	Forest	Omnivore	Generalist	74.3933	1.0388	1.514	101.227	17.1779	0.660502	4.60124	92.1466	25.0262	0.217333
41	Reg_2	Land_9	Aratinga auricapillus	7	Forest	Omnivore	Insessorial	127.928	1.01798	2.052	129.609	46.4804	0.487329	5.68604	120.856	46.7058	0.703478
42	Reg_2	Land_9	Ramphastos toco	1	Grassland	Frugivore	Insessorial	156.375	4.73642	1.652	81.2325	90.1961	0.605327	4.75828	100.857	74.8865	0.21016
43	Reg_2	Land_11	Colaptes melanochloros	1	Forest	Invertivore	Insessorial	79.9825	1.02537	1.57	242.963	37.9259	2.54777	4.72059	158.779	41.9338	1.27103
44	Reg_2	Land_11	Tangara sayaca	1	Forest	Omnivore	Insessorial	52.9286	1.04666	1.293	181.818	43.1373	3.09358	4.16542	148.021	49.1681	1.6805
45	Reg_2	Land_11	Ardea cocoi	1	Wetland	Aquatic predator	Terrestrial	128.81	1.20747	2.009	101.499	26.4129	1.99104	5.51524	127.328	38.2417	1.81316
46	Reg_2	Land_11	Cyanocorax cristatellus	6	Woodland	Omnivore	Insessorial	145.942	1.19811	2.167	115.88	25	2.30734	5.84259	128.953	36.5503	1.88273
47	Reg_2	Land_11	Psittacara leucophthalmus	2	Forest	Omnivore	Insessorial	96.9772	1.19754	1.713	234.652	54.5703	1.75131	4.96479	193.611	45.789	1.81277
48	Reg_2	Land_11	Psittacara leucophthalmus	18	Forest	Omnivore	Insessorial	80.4261	1.09316	1.566	229.75	28.5714	2.55428	4.69258	187.087	30.9609	1.91792
49	Reg_2	Land_11	Psittacara leucophthalmus	12	Forest	Omnivore	Insessorial	124.264	1.02741	2.009	172.216	42.2503	1.99104	5.59847	139.376	43.0953	1.25034
50	Reg_2	Land_11	Tangara sayaca	1	Forest	Omnivore	Insessorial	85.6271	1.04804	1.624	163.15	26.0197	2.46305	4.82046	143.493	32.6076	1.65959
51	Reg_2	Land_13	Aratinga auricapillus	3	Forest	Omnivore	Insessorial	134.723	1.06986	2.099	184.211	9.64912	4.28776	5.76112	162.027	13.6685	2.08293
52	Reg_2	Land_13	Molothrus bonariensis	2	Woodland	Invertivore	Terrestrial	50.2096	1.06057	1.268	200.73	8.75912	4.73186	4.1139	140.105	9.98249	2.18771
53	Reg_2	Land_13	Sporophila caerulescens	1	Shrubland	Granivore	Generalist	47.9001	1.06819	1.248	200.371	8.71985	4.80769	4.07376	139.835	8.87192	2.45473
54	Reg_2	Land_13	Psittacara leucophthalmus	4	Forest	Omnivore	Insessorial	133.562	1.03518	2.104	74.8075	1.76018	2.85171	5.78848	118.476	6.83513	2.24584
55	Reg_2	Land_13	Psittacara leucophthalmus	4	Forest	Omnivore	Insessorial	128.355	1.01286	2.056	59.293	1.02623	2.91829	5.69612	97.3751	5.88484	1.75558
56	Reg_2	Land_13	Colaptes campestris	1	Grassland	Invertivore	Terrestrial	80.7485	1.51885	1.499	102.326	1.86047	4.00267	4.53153	129.952	6.81458	2.64811
57	Reg_2	Land_13	Colaptes campestris	1	Grassland	Invertivore	Terrestrial	53.9306	1.09103	1.3	77.3286	1.23023	3.07692	4.17342	131.429	6.91429	2.63573
58	Reg_2	Land_13	Psittacara leucophthalmus	3	Forest	Omnivore	Insessorial	135.451	1.01366	2.126	71.5835	1.51844	2.8222	5.83554	97.3415	4.66258	2.05637
59	Reg_2	Land_13	Patagioenas picazuro	2	Forest	Omnivore	Generalist	121.517	1.01484	1.988	50.6329	0.805524	2.01207	5.55896	79.7941	3.9468	1.7989
60	Reg_2	Land_13	Tangara sayaca	2	Forest	Omnivore	Insessorial	59.1806	1.06515	1.362	204.082	8.33333	5.1395	4.29978	151.43	10.4879	2.55827
61	Reg_3	Land_2	Sicalis flaveola	1	Shrubland	Granivore	Terrestrial	61.0577	1.01001	1.383	391.304	26.7559	8.67679	4.35055	282.573	31.061	4.82698
62	Reg_3	Land_2	Sicalis flaveola	1	Shrubland	Granivore	Terrestrial	57.6426	1.03376	1.346	387.097	26.9949	8.17236	4.2732	307.35	32.1269	5.6164
63	Reg_3	Land_2	Phaethornis pretrei	1	Woodland	Nectarivore	Aerial	6.92776	1.01294	0.841	391.304	33.4239	8.32342	3.2675	347.699	37.9109	6.12088
64	Reg_3	Land_2	Tangara cayana	1	Forest	Frugivore	Insessorial	9.47915	1.01445	0.866	417.755	38.3812	8.08314	3.31783	357.245	41.7504	5.72663
65	Reg_3	Land_3	Sporophila lineola	1	Shrubland	Granivore	Generalist	90.1342	1.58221	1.601	190.751	33.3815	3.12305	4.69993	193.384	36.7939	2.34046
66	Reg_3	Land_3	Zonotrichia capensis	2	Shrubland	Omnivore	Generalist	50.2986	3.70493	1.109	103.95	28.0665	0.901713	3.7855	165.613	47.914	1.585
67	Reg_3	Land_3	Sicalis flaveola	1	Shrubland	Granivore	Terrestrial	55.1073	1.14737	1.31	150.35	64.1608	0.763359	4.18849	157.624	53.4552	1.4325
68	Reg_3	Land_3	Sicalis flaveola	1	Shrubland	Granivore	Terrestrial	57.5822	1.2362	1.303	137.809	59.1873	0.76746	4.17013	143.843	52.3015	1.4388
69	Reg_3	Land_5	Tangara cayana	1	Forest	Frugivore	Insessorial	61.0194	1.18073	1.365	221.465	24.5315	4.3956	4.28734	174.399	44.7177	3.49867
70	Reg_3	Land_5	Tangara cayana	1	Forest	Frugivore	Insessorial	56.4434	1.15914	1.321	207.972	24.2634	3.78501	4.20791	177.042	44.3175	3.56472
71	Reg_3	Land_5	Caracara plancus	1	Shrubland	Omnivore	Terrestrial	65.2212	1.12328	1.395	280.066	31.4662	7.8853	4.36494	173.246	45.1206	3.43648
72	Reg_3	Land_5	Caracara plancus	1	Shrubland	Omnivore	Terrestrial	68.4151	1.05361	1.443	219.745	53.1847	4.158	4.46883	150.641	61.5385	3.13281
73	Reg_3	Land_5	Zonotrichia capensis	1	Shrubland	Omnivore	Generalist	16.5689	1.04635	0.933	224.39	36.0976	4.28725	3.45314	183.575	52.9331	4.05428
74	Reg_3	Land_6	Tangara cayana	1	Forest	Frugivore	Insessorial	51.6912	1.12203	1.272	230.769	18.6813	5.50314	4.11902	131.395	17.6163	2.67054
75	Reg_3	Land_6	Tangara cayana	1	Forest	Frugivore	Insessorial	55.7674	1.13501	1.308	223.776	19.2308	5.35168	4.18755	128.628	17.7006	2.62683
76	Reg_3	Land_6	Caracara plancus	1	Shrubland	Omnivore	Terrestrial	203.662	1.03446	2.794	122.517	10.0993	3.22119	7.16755	110.442	14.0228	1.67421
77	Reg_3	Land_6	Hirundinea ferruginea	1	Rock	Invertivore	Insessorial	25.0921	6.63279	0.906	119.701	1.99501	5.51876	3.39724	111.498	8.91986	2.94357
78	Reg_3	Land_6	Psittacara leucophthalmus	1	Forest	Omnivore	Insessorial	138.998	1.03217	2.159	120.82	4.09924	3.24224	5.89703	119.232	7.71744	2.37407
79	Reg_3	Land_7	Coragyps atratus	1	Human Modified	Scavenger	Terrestrial	509.098	1.63863	5.653	148.609	12.2873	2.65346	12.4091	149.26	19.9337	2.337
80	Reg_3	Land_7	Ramphastos toco	1	Grassland	Frugivore	Insessorial	350.696	1.18385	4.265	123.43	10.1038	1.87573	10.048	110.312	11.3909	1.39331
81	Reg_3	Land_7	Ramphastos toco	4	Grassland	Frugivore	Insessorial	455.825	1.34347	5.329	184.534	14.2794	3.37774	12.2368	154.605	16.5451	2.28819
82	Reg_3	Land_11	Molothrus bonariensis	1	Woodland	Invertivore	Terrestrial	38.5303	1.06824	1.153	237.154	29.4466	2.60191	3.88682	229.307	33.599	1.80096
83	Reg_3	Land_11	Tangara sayaca	2	Forest	Omnivore	Insessorial	172.257	1.00342	2.496	201.852	50.7407	1.60256	6.57599	186.977	49.2907	1.36861
84	Reg_3	Land_11	Tangara sayaca	2	Forest	Omnivore	Insessorial	62.264	1.05397	1.393	287.582	34.6405	2.15363	4.36409	188.865	35.5895	1.37486
85	Reg_3	Land_13	Psittacara leucophthalmus	5	Forest	Omnivore	Insessorial	256.612	1.05943	3.336	245.833	18.8889	5.69544	8.24989	210.465	26.686	4.72734
86	Reg_3	Land_13	Geranoaetus albicaudatus	1	Grassland	Vertivore	Generalist	83.2414	32.9636	1.243	194.853	3.67647	6.43604	4.02958	228.132	5.08274	6.94861
87	Reg_3	Land_13	Xolmis velatus	1	Shrubland	Invertivore	Insessorial	69.7063	1.01273	1.466	172.308	6	4.09277	4.51912	219.538	4.77941	5.97462
88	Reg_3	Land_13	Patagioenas picazuro	2	Forest	Omnivore	Generalist	265.851	1.04283	3.426	173.497	18.5792	3.50263	8.43143	156.84	27.3039	2.60929
89	Reg_3	Land_13	Brotogeris chiriri	2	Forest	Omnivore	Insessorial	281.92	1.06114	3.587	166.452	14	3.90298	8.74951	165.479	21.589	4.11452
90	Reg_3	Land_13	Stelgidopteryx ruficollis	1	Shrubland	Invertivore	Aerial	46.0752	1.02882	1.229	122.449	3.8961	2.44101	4.04198	158.019	3.89151	3.95845
91	Reg_4	Land_1	Caracara plancus	1	Shrubland	Omnivore	Terrestrial	30.2145	1.02987	1.074	0	0	0	3.73012	0	0	0
92	Reg_4	Land_1	Caracara plancus	1	Shrubland	Omnivore	Terrestrial	201.283	1.05266	2.785	66.7223	23.6864	0.359066	7.15099	69.7752	26.2999	0.279682
93	Reg_4	Land_1	Caracara plancus	1	Shrubland	Omnivore	Terrestrial	190.514	1.07543	2.675	63.5193	15.4506	0.373832	6.93057	81.4636	25.3711	0.144288
94	Reg_4	Land_1	Patagioenas picazuro	1	Forest	Omnivore	Generalist	224.61	1.03126	3.018	12.3552	0.46332	0.331345	7.61391	44.9225	3.63809	0.525355
95	Reg_4	Land_1	Patagioenas picazuro	2	Forest	Omnivore	Generalist	170.101	1.19245	2.469	0	0	0	6.44846	8.92857	0.63244	0.155076
96	Reg_4	Land_1	Patagioenas picazuro	1	Forest	Omnivore	Generalist	223.131	1.12401	3.001	74.361	21.3788	0.666445	7.58132	98.1323	23.3302	0.527613
97	Reg_4	Land_1	Tangara sayaca	1	Forest	Omnivore	Insessorial	83.7265	1.07159	1.608	124.277	23.4104	1.86567	4.79025	140.562	29.1667	0.417515
98	Reg_4	Land_2	Caracara plancus	1	Shrubland	Omnivore	Terrestrial	311.892	1.00891	3.893	79.9523	36.8735	0.256871	9.36818	67.7097	30.059	0.106744
99	Reg_4	Land_2	Patagioenas picazuro	1	Forest	Omnivore	Generalist	403.381	1.15852	4.804	93.0683	22.2007	0.41632	11.1886	84.8224	22.9279	0.268131
100	Reg_4	Land_2	Egretta thula	1	Wetland	Aquatic predator	Terrestrial	355.563	1.00808	4.329	95.0837	17.8822	0.231	10.2413	57.4253	21.0638	0.0976434
101	Reg_4	Land_2	Colaptes campestris	1	Grassland	Invertivore	Terrestrial	301.552	1.04876	3.787	60.4565	6.60086	0.528123	9.15437	53.1719	14.846	0.109237
102	Reg_4	Land_2	Patagioenas picazuro	2	Forest	Omnivore	Generalist	447.42	1.08583	5.244	48.9978	8.46325	0.572082	12.0652	67.1061	19.9121	0.24865
103	Reg_4	Land_5	Tachyphonus coronatus	1	Forest	Invertivore	Insessorial	95.7504	1.05282	1.728	234.519	28.8538	3.47222	5.03666	223.485	18.0871	3.37525
104	Reg_4	Land_5	Zenaida auriculata	1	Human Modified	Granivore	Terrestrial	83.3512	1.0182	1.606	111.748	28.0802	0.622665	4.79172	170.659	17.9142	2.08693
105	Reg_4	Land_5	Machetornis rixosa	1	Grassland	Invertivore	Terrestrial	132.828	1.02655	2.099	123.348	25.8811	0.476417	5.77339	127.182	15.7107	1.38567
106	Reg_4	Land_5	Psittacara leucophthalmus	1	Forest	Omnivore	Insessorial	131.984	1.04932	2.092	183.425	13.4807	2.86807	5.76578	196.762	12.2457	3.64218
107	Reg_4	Land_5	Psittacara leucophthalmus	1	Forest	Omnivore	Insessorial	94.2824	1.02289	1.715	90.7877	24.5661	0.58309	5.01062	113.225	15.7945	0.99788
108	Reg_4	Land_5	Columbina talpacoti	1	Human Modified	Granivore	Terrestrial	93.3335	1.02306	1.706	128.24	29.3315	0.586166	4.99349	110.683	17.9018	0.400522
110	Reg_4	Land_7	Caracara plancus	1	Shrubland	Omnivore	Terrestrial	171.941	1.03491	2.492	444.651	33.0233	11.6372	6.56434	340.022	40.4962	7.92158
111	Reg_4	Land_7	Caracara plancus	1	Shrubland	Omnivore	Terrestrial	135.337	1.06164	2.118	446.154	59.5604	8.49858	5.81351	287.371	63.8095	5.50442
112	Reg_4	Land_7	Forpus xanthopterygius	6	Forest	Omnivore	Insessorial	77.0974	1.0107	1.544	506.747	47.5262	12.9534	4.6724	341.189	53.8934	7.4908
113	Reg_4	Land_7	Caracara plancus	1	Shrubland	Omnivore	Terrestrial	143.918	1.04615	2.202	252.874	76.5935	4.99546	5.97936	228.091	73.3093	4.85002
114	Reg_4	Land_7	Columbina talpacoti	1	Human Modified	Granivore	Terrestrial	92.0765	1.01276	1.694	601.889	14.4399	15.3483	4.97213	429.871	14.5524	9.85493
115	Reg_4	Land_7	Coragyps atratus	3	Human Modified	Scavenger	Terrestrial	220.746	3.93497	2.231	322.581	53.9022	5.82698	5.97446	298.555	53.7721	5.85827
116	Reg_4	Land_10	Patagioenas picazuro	1	Forest	Omnivore	Generalist	42.2704	1.0875	1.184	490.421	12.2605	11.8243	3.94762	195.063	4.51535	5.31966
117	Reg_4	Land_10	Patagioenas picazuro	1	Forest	Omnivore	Generalist	53.4255	1.31266	1.262	402.194	10.6033	8.71632	4.08689	212.741	4.85096	5.87243
118	Reg_4	Land_10	Patagioenas picazuro	2	Forest	Omnivore	Generalist	92.9423	1.03368	1.699	326.975	8.03815	7.65156	4.97677	186.024	4.14458	5.22427
119	Reg_4	Land_10	Guira guira	1	Human Modified	Invertivore	Terrestrial	44.0348	1.29173	1.171	484.127	12.3016	11.1016	3.91042	223.716	5.13447	5.88173
120	Reg_4	Land_10	Amazonetta brasiliensis	2	Wetland	Herbivore aquatic	Aquatic	101.34	1.28946	1.696	398.385	9.42127	10.6132	4.91264	219.311	5.62834	5.49603
121	Reg_4	Land_10	Caracara plancus	1	Shrubland	Omnivore	Terrestrial	107.915	1.01283	1.852	250.932	6.95652	7.01944	5.28694	181.736	4.20434	4.72864
122	Reg_4	Land_10	Tangara sayaca	2	Forest	Omnivore	Insessorial	41.8667	1.0627	1.182	400.771	10.79	8.46024	3.94488	214.587	4.94274	5.83034
123	Reg_4	Land_10	Tangara sayaca	3	Forest	Omnivore	Insessorial	62.9316	1.11253	1.385	254.125	7.75578	5.05415	4.33521	204.396	4.61538	5.53606
124	Reg_4	Land_10	Bubulcus ibis	1	Human Modified	Omnivore	Terrestrial	66.7879	1.08491	1.433	305.466	8.5209	6.97837	4.43975	217.79	4.95957	5.85618
125	Reg_4	Land_10	Bubulcus ibis	2	Human Modified	Omnivore	Terrestrial	88.4593	1.10577	1.626	363.121	9.21986	9.8401	4.82226	223.769	5.91745	5.39166
126	Reg_4	Land_10	Patagioenas picazuro	1	Forest	Omnivore	Generalist	88.2804	1.0231	1.655	376.045	9.1922	9.06344	4.89079	194.716	4.89237	4.90719
127	Reg_4	Land_12	Sicalis flaveola	3	Shrubland	Granivore	Terrestrial	302.944	1.02553	3.803	62.6536	2.7027	1.5777	9.18963	85.4298	7.6782	1.52346
128	Reg_4	Land_12	Progne tapera	1	Grassland	Invertivore	Aerial	140.851	1.07956	2.178	0	0	0	5.93194	39.6922	2.34913	1.18005
129	Reg_4	Land_12	Stelgidopteryx ruficollis	1	Shrubland	Invertivore	Aerial	184.474	1.30419	2.351	0	0	0	6.23007	19.2456	2.04003	0.160512
130	Reg_4	Land_12	Sicalis flaveola	2	Shrubland	Granivore	Terrestrial	321.302	37.1091	2.634	42.5155	3.18866	0.759301	6.61207	101.67	8.42411	1.9661
131	Reg_4	Land_12	Progne tapera	2	Grassland	Invertivore	Aerial	181.717	1.45962	2.166	0	0	0	5.83911	23.7705	2.82787	0.171259
132	Reg_4	Land_12	Zenaida auriculata	3	Human Modified	Granivore	Terrestrial	345.127	1.01556	4.225	67.5152	3.1544	1.42012	10.0306	95.6041	7.06221	1.59512
133	Reg_4	Land_15	Caracara plancus	1	Shrubland	Omnivore	Terrestrial	203.573	1.47767	2.77	141.772	2.8692	3.2491	6.943	132.685	4.65439	2.44851
134	Reg_4	Land_15	Patagioenas picazuro	1	Forest	Omnivore	Generalist	161.67	1.1833	2.355	174.681	3.92542	4.24628	6.23447	155.444	3.46287	2.72677
135	Reg_4	Land_15	Tangara cayana	1	Forest	Frugivore	Insessorial	98.6244	1.11775	1.753	175.299	3.58566	3.99315	5.06304	140.751	4.0894	2.76514
136	Reg_4	Land_15	Caracara plancus	1	Shrubland	Omnivore	Terrestrial	129.991	1.35265	1.997	110.329	2.46479	3.50526	5.49321	134.387	3.20597	2.73064
137	Reg_4	Land_15	Tachycineta leucorrhoa	1	Grassland	Invertivore	Aerial	136.931	5.30166	1.752	229.333	5.46667	5.13699	4.91709	173.659	3.90244	4.06745
138	Reg_4	Land_15	Caracara plancus	1	Shrubland	Omnivore	Terrestrial	41.6642	1.20465	1.167	62.0155	1.16279	1.7138	3.90723	76.6423	1.88564	1.79155
139	Reg_4	Land_15	Ammodramus humeralis	1	Grassland	Granivore	Terrestrial	97.5014	1.05646	1.739	175.766	4.12783	3.45026	5.05092	186.907	4.0797	3.95967
140	Reg_4	Land_15	Eupsittula aurea	1	Grassland	Omnivore	Insessorial	129.862	1.05498	2.069	243.575	5.69832	5.7999	5.71631	162.343	3.38912	4.02358
141	Reg_4	Land_15	Eupsittula aurea	1	Grassland	Omnivore	Insessorial	65.4662	1.26743	1.393	105.611	2.14521	2.8715	4.34138	120.946	2.74876	2.53375
142	Reg_4	Land_15	Caracara plancus	1	Shrubland	Omnivore	Terrestrial	132.882	1.30715	2.092	103.07	2.08333	2.39006	5.67381	145.623	3.367	2.81997
143	Reg_4	Land_15	Caracara plancus	1	Shrubland	Omnivore	Terrestrial	217.407	1.30152	2.932	98.0237	2.9249	2.38745	7.39034	128.739	6.11183	2.16499
144	Reg_4	Land_15	Patagioenas picazuro	1	Forest	Omnivore	Generalist	67.8734	1.08325	1.45	86.1244	2.07337	2.75862	4.47077	73.9154	1.76754	1.56573
145	Reg_4	Land_15	Patagioenas picazuro	1	Forest	Omnivore	Generalist	307.245	3.32725	2.832	221.675	4.5977	5.64972	7.14093	179.064	3.83709	3.50094
146	Reg_5	Land_2	Eupsittula aurea	1	Grassland	Omnivore	Insessorial	164.316	1.0182	2.416	189.189	13.8996	2.48344	6.41701	153.501	24.7098	1.40252
147	Reg_5	Land_2	Patagioenas picazuro	1	Forest	Omnivore	Generalist	280.342	1.07718	3.564	273.145	18.5161	4.76992	8.68138	206.168	27.8411	2.76454
148	Reg_5	Land_2	Patagioenas picazuro	1	Forest	Omnivore	Generalist	129.517	1.06781	2.06	391.892	16.1036	8.73786	5.68986	260.465	9.68288	5.09679
149	Reg_5	Land_2	Patagioenas picazuro	1	Forest	Omnivore	Generalist	120.564	1.17014	1.965	341.52	9.00585	8.14249	5.48207	232.883	7.67553	4.92515
150	Reg_5	Land_2	Patagioenas picazuro	1	Forest	Omnivore	Generalist	138.442	1.57178	1.927	364.72	10.9654	8.30306	5.43715	254.721	8.60782	5.33368
151	Reg_5	Land_3	Coragyps atratus	1	Human Modified	Scavenger	Terrestrial	153.401	1.07442	2.279	191.057	3.76016	7.02062	6.12758	190.439	5.25078	4.7327
152	Reg_5	Land_3	Coragyps atratus	1	Human Modified	Scavenger	Terrestrial	143.665	1.0665	2.194	150.583	2.96925	5.46946	5.96088	190.016	7.1256	4.19401
153	Reg_5	Land_3	Coragyps atratus	1	Human Modified	Scavenger	Terrestrial	101.382	1.05776	1.785	78.125	1.5625	1.68067	5.14301	171.642	8.02239	4.27765
154	Reg_5	Land_3	Coragyps atratus	1	Human Modified	Scavenger	Terrestrial	177.861	1.03324	2.546	179.652	19.0651	1.17832	6.67024	137.807	14.3218	1.19936
155	Reg_5	Land_3	Bubulcus ibis	1	Human Modified	Omnivore	Terrestrial	182.479	1.03619	2.587	149.955	6.41373	1.93274	6.74832	114.918	6.70949	1.48185
156	Reg_5	Land_5	Caracara plancus	1	Shrubland	Omnivore	Terrestrial	215.248	1.36486	2.781	34.8259	3.06799	0.359583	6.96292	51.5287	7.62625	0.143618
157	Reg_5	Land_5	Patagioenas picazuro	1	Forest	Omnivore	Generalist	210.673	1.1341	2.832	13.0719	0.898693	0.353107	7.158	47.683	7.62257	0.419112
158	Reg_5	Land_7	Myiothlypis flaveola	1	Woodland	Invertivore	Generalist	32.1284	1.29385	1.063	25.8065	0.430108	0.940734	3.69985	73.3119	1.4791	1.89197
159	Reg_5	Land_7	Tachyphonus coronatus	1	Forest	Invertivore	Insessorial	59.1588	1.01907	1.363	20.3046	0.338409	0.733676	4.3099	61.9469	1.21681	1.62417
160	Reg_5	Land_7	Patagioenas picazuro	1	Forest	Omnivore	Generalist	145.377	1.04731	2.218	43.659	1.0395	0.901713	6.01237	63.7959	1.39553	1.33059
161	Reg_5	Land_7	Patagioenas picazuro	1	Forest	Omnivore	Generalist	128.099	1.02141	2.044	42.8894	1.0158	0.978474	5.67356	65.0063	1.47742	1.58631
162	Reg_5	Land_7	Nemosia pileata	1	Forest	Invertivore	Insessorial	58.8148	1.05274	1.353	20.4429	0.340716	0.739098	4.28249	61.4525	1.22905	1.63456
163	Reg_5	Land_7	Ramphastos toco	1	Grassland	Frugivore	Insessorial	67.8545	1.08745	1.443	19.0476	0.31746	0.693001	4.45177	71.8499	1.3941	2.2463
164	Reg_5	Land_7	Ramphastos toco	1	Grassland	Frugivore	Insessorial	23.5247	1.00717	1.008	26.9663	0.449438	0.992063	3.59944	43.6508	0.859788	1.94475
165	Reg_5	Land_7	Ramphastos toco	1	Grassland	Frugivore	Insessorial	24.1681	1.02715	1.013	27.027	0.45045	0.987167	3.60952	43.5356	0.791557	1.93931
166	Reg_5	Land_7	Ramphastos toco	1	Grassland	Frugivore	Insessorial	43.7582	1.04986	1.205	22.6415	0.377358	0.829876	3.99023	49.9703	1.07079	2.0049
167	Reg_5	Land_9	Sicalis flaveola	2	Shrubland	Granivore	Terrestrial	66.8168	1.0443	1.441	187.302	42.381	1.38793	4.46275	270.733	41.0915	2.68892
168	Reg_5	Land_9	Tangara sayaca	1	Forest	Omnivore	Insessorial	82.2955	1.02723	1.591	228.571	37.5714	3.14268	4.76178	260.87	38.1809	2.31006
169	Reg_5	Land_9	Patagioenas picazuro	1	Forest	Omnivore	Generalist	166.378	7.02187	1.862	250.62	55.2109	0.537057	5.1607	278.575	44.3313	2.71281
170	Reg_5	Land_9	Caracara plancus	1	Shrubland	Omnivore	Terrestrial	60.0321	1.05068	1.362	302.207	53.4805	0.734214	4.29949	251.951	48.2163	2.09327
171	Reg_5	Land_11	Columbina talpacoti	1	Human Modified	Granivore	Terrestrial	88.5236	1.04612	1.653	77.7778	19.3056	0.604961	4.87957	77.413	16.6095	0.204936
172	Reg_5	Land_11	Columbina talpacoti	1	Human Modified	Granivore	Terrestrial	92.8813	1.0438	1.69	70.6522	15.7609	0.591716	4.95902	77.0342	17.0438	0.201653
173	Reg_5	Land_11	Columbina talpacoti	1	Human Modified	Granivore	Terrestrial	88.3449	1.00919	1.655	78.1032	19.5258	0.60423	4.8931	82.9268	17.0732	0.204369
174	Reg_5	Land_11	Sicalis flaveola	2	Shrubland	Granivore	Terrestrial	52.6267	3.38946	1.125	0	0	0	3.81802	32.4797	5.18426	0.261916
175	Reg_5	Land_11	Caracara plancus	1	Shrubland	Omnivore	Terrestrial	110.498	1.18367	1.829	226.175	46.8869	0.546747	5.20542	150.438	28.4725	0.192108
176	Reg_5	Land_11	Patagioenas picazuro	1	Forest	Omnivore	Generalist	52.5272	1.0269	1.296	0	0	0	4.17423	0	0	0
177	Reg_5	Land_11	Stelgidopteryx ruficollis	1	Shrubland	Invertivore	Aerial	147.038	1.24328	2.058	72.2348	19.4131	0.485909	5.67224	76.9882	15.1015	0.176297
178	Reg_5	Land_14	Patagioenas picazuro	1	Forest	Omnivore	Generalist	430.81	1.11432	5.075	16.6282	0.277136	0.788177	11.7242	30.4903	0.597445	0.852934
179	Reg_6	Land_1	Sicalis flaveola	1	Shrubland	Granivore	Terrestrial	18.9887	1.02583	0.962	271.429	5.47619	8.31601	3.50744	148.4	2.85909	4.27663
180	Reg_6	Land_1	Sicalis flaveola	1	Shrubland	Granivore	Terrestrial	17.3398	1.02793	0.946	266.033	5.22565	8.45666	3.4741	150.068	2.93315	4.02982
181	Reg_6	Land_1	Megaceryle torquata	1	Riverine	Aquatic predator	Insessorial	96.4992	1.00416	1.738	208.443	3.95778	6.32911	5.06004	159.735	3.21361	3.95254
182	Reg_6	Land_1	Sicalis flaveola	7	Shrubland	Granivore	Terrestrial	63.6357	1.02382	1.407	201.987	3.80795	6.39659	4.39466	167.122	5.62534	4.09588
183	Reg_6	Land_1	Eupsittula aurea	4	Grassland	Omnivore	Insessorial	184.658	1.3998	2.602	221.429	7.85714	5.38048	6.65376	181.884	17.1418	3.75727
184	Reg_6	Land_2	Nemosia pileata	1	Forest	Invertivore	Insessorial	163.852	1.10109	2.409	105.871	19.538	2.07555	6.37531	144.415	25.3479	2.35283
185	Reg_6	Land_2	Patagioenas picazuro	1	Forest	Omnivore	Generalist	166.535	1.11881	2.429	158.7	17.6864	3.29354	6.40672	153.846	20.1501	2.96564
186	Reg_6	Land_2	Ramphastos toco	1	Grassland	Frugivore	Insessorial	55.6284	1.10164	1.324	188.356	17.8082	2.26586	4.2196	140.924	27.4521	2.36989
187	Reg_6	Land_2	Ramphastos toco	1	Grassland	Frugivore	Insessorial	49.3337	1.05113	1.262	198.556	18.7726	2.37718	4.10395	136.97	28.5548	1.70567
188	Reg_6	Land_2	Stelgidopteryx ruficollis	1	Shrubland	Invertivore	Aerial	23.8398	1.17596	0.997	205.95	5.72082	4.01204	3.57827	152.101	7.87191	3.07411
189	Reg_6	Land_2	Stelgidopteryx ruficollis	1	Shrubland	Invertivore	Aerial	20.9125	1.07293	0.977	245.94	6.2645	5.11771	3.53797	146.407	6.71592	3.10912
190	Reg_6	Land_2	Patagioenas picazuro	1	Forest	Omnivore	Generalist	92.4994	1.0239	1.697	186.301	4.38356	4.12493	4.97479	113.153	4.98066	2.41216
191	Reg_6	Land_3	Cairina moschata	1	Wetland	Omnivore	Generalist	150.761	1.02305	2.279	168.528	28.8325	1.31637	6.13659	127.776	37.7873	1.30366
192	Reg_6	Land_3	Eupsittula aurea	1	Grassland	Omnivore	Insessorial	143.893	1.05155	2.207	133.472	14.1814	2.26552	5.98913	127.048	26.3684	1.83666
193	Reg_6	Land_3	Eupsittula aurea	1	Grassland	Omnivore	Insessorial	144.543	1.05496	2.211	143.302	16.0955	1.80914	5.98772	126.249	27.2473	2.0041
194	Reg_6	Land_3	Psittacara leucophthalmus	1	Forest	Omnivore	Insessorial	242.055	1.11804	3.181	84.7334	9.56903	1.57183	7.92595	123.217	23.5508	2.01869
195	Reg_6	Land_3	Psittacara leucophthalmus	1	Forest	Omnivore	Insessorial	246.053	1.10323	3.213	85.8806	12.2271	1.55618	7.98398	117.47	25.5723	1.75351
196	Reg_6	Land_5	Psittacara leucophthalmus	1	Forest	Omnivore	Insessorial	171.32	1.03962	2.482	208.372	3.90698	7.25222	6.54209	159.765	3.51777	4.58569
197	Reg_6	Land_5	Psittacara leucophthalmus	1	Forest	Omnivore	Insessorial	162.802	1.03698	2.394	207.164	3.87222	6.26566	6.36542	163.097	3.53251	4.55587
198	Reg_6	Land_5	Psittacara leucophthalmus	7	Forest	Omnivore	Insessorial	61.3906	1.03427	1.384	104.73	1.68919	5.0578	4.34677	156.233	3.04709	4.83117
199	Reg_6	Land_11	Sicalis flaveola	7	Shrubland	Granivore	Terrestrial	74.1997	1.07302	1.503	0	0	0	4.58013	0	0	0
200	Reg_6	Land_11	Sicalis flaveola	1	Shrubland	Granivore	Terrestrial	69.4515	1.04112	1.463	0	0	0	4.50393	0	0	0
201	Reg_6	Land_11	Zonotrichia capensis	1	Shrubland	Omnivore	Generalist	112.416	1.01752	1.897	0	0	0	5.37545	0	0	0
202	Reg_6	Land_11	Patagioenas picazuro	1	Forest	Omnivore	Generalist	159.047	1.02801	2.359	0	0	0	6.29931	0	0	0
203	Reg_6	Land_11	Psittacara leucophthalmus	10	Forest	Omnivore	Insessorial	175.303	1.04019	2.525	0	0	0	6.62767	0	0	0
204	Reg_6	Land_13	Stelgidopteryx ruficollis	1	Shrubland	Invertivore	Aerial	60.4317	2.17785	1.101	90.9091	10.3306	0.908265	3.77077	60.5678	5.11041	0.265198
205	Reg_6	Land_13	Tachycineta albiventer	1	Riverine	Invertivore	Aerial	97.4115	1.9095	1.619	88.9527	9.61263	0.617665	4.72297	48.6815	4.10751	0.211731
206	Reg_6	Land_13	Stelgidopteryx ruficollis	1	Shrubland	Invertivore	Aerial	63.436	2.22931	1.123	56.6802	4.65587	0.890472	3.81378	59.9251	5.05618	0.262207
207	Reg_6	Land_13	Stelgidopteryx ruficollis	1	Shrubland	Invertivore	Aerial	43.7899	2.97888	0.993	101.382	9.90783	1.00705	3.56431	64.257	5.42169	0.280559
208	Reg_6	Land_13	Zonotrichia capensis	1	Shrubland	Omnivore	Generalist	46.8423	1.08585	1.23	120.527	12.9944	0.813008	4.0365	57.0071	4.80998	0.24774
209	Reg_6	Land_13	Amazonetta brasiliensis	1	Wetland	Herbivore aquatic	Aquatic	193.401	1.05315	2.707	35.6839	3.22855	0.369413	6.99424	32.8317	2.77018	0.142975
210	Reg_6	Land_13	Sicalis flaveola	2	Shrubland	Granivore	Terrestrial	59.3628	1.06736	1.361	159.052	13.7056	0.734754	4.29821	53.4521	4.51002	0.232655
211	Reg_6	Land_13	Thlypopsis sordida	1	Forest	Omnivore	Insessorial	160.494	1.28331	2.315	55.8882	5.68862	0.431965	6.10761	37.6471	3.17647	0.16373
212	Reg_7	Land_6	Psittacara leucophthalmus	2	Forest	Omnivore	Insessorial	188.854	1.05864	2.655	56.1896	2.10711	1.50659	6.88291	104.087	3.77227	2.03402
213	Reg_7	Land_6	Psittacara leucophthalmus	8	Forest	Omnivore	Insessorial	183.616	1.02506	2.606	166.966	6.82226	3.06984	6.7946	100.674	3.50939	1.61893
214	Reg_7	Land_6	Sicalis flaveola	1	Shrubland	Granivore	Terrestrial	89.5287	1.03452	1.664	99.3103	2.48276	2.40385	4.90643	99.3668	3.45835	2.03814
215	Reg_7	Land_6	Pseudoleistes guirahuro	10	Human Modified	Omnivore	Terrestrial	141.498	1.03201	2.184	77.5027	2.15285	2.28938	5.94511	106.202	3.89137	1.85026
216	Reg_7	Land_6	Chrysomus ruficapillus	2	Wetland	Granivore	Insessorial	172.388	1.08535	2.487	145.251	4.00372	3.61882	6.52854	143.172	5.43319	2.60395
217	Reg_7	Land_6	Patagioenas picazuro	1	Forest	Omnivore	Generalist	312.935	1.01965	3.898	126.416	4.83005	1.79579	9.37475	73.903	2.72004	1.17336
218	Reg_7	Land_6	Trochilidae	1	NA	Nectarivore	NA	202.692	1.02556	2.796	101.161	3.89718	2.50358	7.17374	120.215	3.55944	2.36975
219	Reg_7	Land_7	Psittacara leucophthalmus	8	Forest	Omnivore	Insessorial	192.583	1.02902	2.698	107.92	9.74761	0.370645	6.97892	165.284	12.1369	2.14933
220	Reg_7	Land_7	Coragyps atratus	1	Human Modified	Scavenger	Terrestrial	179.656	1.03952	2.561	117.86	10.6074	0.390472	6.69589	166.487	10.4055	1.94149
221	Reg_7	Land_7	Milvago chimachima	1	Grassland	Omnivore	Terrestrial	94.6696	1.07892	1.715	165.761	63.9946	0.58309	5.00916	160.038	44.6574	0.199634
222	Reg_7	Land_7	Caracara plancus	2	Shrubland	Omnivore	Terrestrial	131.819	1.01142	2.091	127.753	18.6123	0.95648	5.76531	171.239	23.6908	1.04071
223	Reg_7	Land_7	Patagioenas picazuro	2	Forest	Omnivore	Generalist	150.375	1.02551	2.274	175.935	14.6613	1.31926	6.12805	130.367	7.9235	1.79503
224	Reg_7	Land_7	Dacnis cayana	1	Forest	Frugivore	Insessorial	146.817	1.00579	2.242	157.464	37.0143	0.892061	6.06785	201.104	35.0946	1.81283
225	Reg_7	Land_7	Psittacara leucophthalmus	3	Forest	Omnivore	Insessorial	147.402	1.00687	2.247	117.89	24.1986	0.890076	6.07859	149.961	20.6788	0.98707
226	Reg_7	Land_7	Caracara plancus	1	Shrubland	Omnivore	Terrestrial	188.718	1.03045	2.658	135.325	44.3761	0.376223	6.89603	165.969	40.8996	1.01508
227	Reg_7	Land_7	Stelgidopteryx ruficollis	2	Shrubland	Invertivore	Aerial	157.049	1.00768	2.344	149.551	33.3001	0.853242	6.2708	179.3	31.5891	1.43522
228	Reg_7	Land_7	Psittacara leucophthalmus	3	Forest	Omnivore	Insessorial	108.63	1.02252	1.859	288.177	22.0443	2.15169	5.2995	156.827	9.19333	2.07567
229	Reg_7	Land_10	Bubulcus ibis	1	Human Modified	Omnivore	Terrestrial	167.426	1.03977	2.446	0	0	0	6.46801	0	0	0
230	Reg_7	Land_10	Bubulcus ibis	1	Human Modified	Omnivore	Terrestrial	154.795	1.02398	2.321	0	0	0	6.22506	0	0	0
231	Reg_7	Land_10	Phacellodomus ruber	1	Shrubland	Invertivore	Generalist	69.7119	15.7589	1.041	0	0	0	3.65069	0	0	0
232	Reg_7	Land_10	Megaceryle torquata	1	Riverine	Aquatic predator	Insessorial	165.059	1.0658	2.419	0	0	0	6.41363	5.99475	0.112402	0.155918
233	Reg_7	Land_10	Colaptes campestris	1	Grassland	Invertivore	Terrestrial	112.454	1.00974	1.897	0	0	0	5.37712	0	0	0
234	Reg_7	Land_10	Patagioenas picazuro	2	Forest	Omnivore	Generalist	170.589	1.08371	2.473	14.8699	0.185874	0.808734	6.50712	25.0092	0.735565	0.614711
235	Reg_7	Land_10	Jacana jacana	1	Wetland	Omnivore	Terrestrial	155.554	1.02076	2.328	0	0	0	6.23866	0	0	0
236	Reg_7	Land_11	Psittacara leucophthalmus	6	Forest	Omnivore	Insessorial	99.6303	1.10271	1.763	118.265	3.28515	2.83607	5.0889	81.9209	1.88324	2.16157
237	Reg_7	Land_11	Patagioenas picazuro	1	Forest	Omnivore	Generalist	96.5222	1.00518	1.739	105.96	3.17881	2.87522	5.0615	81.2854	1.89036	2.17327
238	Reg_7	Land_11	Jacana jacana	2	Wetland	Omnivore	Terrestrial	51.5521	1.90686	1.075	127.389	4.03397	2.7907	3.72484	69.1864	1.79372	1.61081
239	Reg_7	Land_13	Tachycineta albiventer	9	Riverine	Invertivore	Aerial	72.4061	1.38289	1.406	0	0	0	4.36754	28.5714	2.69231	0.457924
240	Reg_7	Land_13	Tachycineta albiventer	9	Riverine	Invertivore	Aerial	90.6711	1.63929	1.38	0	0	0	4.31857	37.5069	3.4749	0.463116
241	Reg_7	Land_13	Arundinicola leucocephala	1	Wetland	Invertivore	Insessorial	49.7606	1.53562	1.115	41.1523	2.05761	0.896861	3.80575	71.1167	10.8546	0.525521
242	Reg_7	Land_13	Patagioenas picazuro	1	Forest	Omnivore	Generalist	86.2695	1.06449	1.63	143.865	51.622	0.613497	4.8325	76.999	41.7078	0.206932
243	Reg_7	Land_13	Fluvicola nengeta	1	Wetland	Invertivore	Terrestrial	85.1581	1.05252	1.619	0	0	0	4.81339	52.7626	7.31707	0.623261
244	Reg_7	Land_13	Certhiaxis cinnamomeus	1	Wetland	Invertivore	Insessorial	31.3938	1.11354	1.074	0	0	0	3.72777	0	0	0
245	Reg_7	Land_14	Elaenia spp	1	NA	Invertivore	NA	143.33	1.02557	2.204	67.8685	16.5429	0.453721	5.98766	90.836	18.8505	0.16701
246	Reg_7	Land_14	Patagioenas picazuro	2	Forest	Omnivore	Generalist	111.31	2.9311	1.404	134.206	35.3519	0.712251	4.3237	87.1484	39.3271	0.231283
247	Reg_7	Land_14	Sicalis flaveola	1	Shrubland	Granivore	Terrestrial	71.2762	1.02147	1.484	0	0	0	4.54956	49.2662	4.03564	0.439603
248	Reg_7	Land_14	Sicalis flaveola	1	Shrubland	Granivore	Terrestrial	144.15	1.02765	2.205	65.0577	16.7891	0.453515	5.98218	95.3908	20.4409	0.167163
249	Reg_7	Land_14	Psittacara leucophthalmus	2	Forest	Omnivore	Insessorial	120.727	1.21591	1.962	101.296	36.9847	0.509684	5.44466	84.3215	38.6473	0.367332
250	Reg_7	Land_14	Sicalis flaveola	1	Shrubland	Granivore	Terrestrial	57.419	1.09419	1.336	127.586	41.5517	0.748503	4.24333	90.4466	45.8451	0.235664
251	Reg_8	Land_1	Patagioenas picazuro	1	Forest	Omnivore	Generalist	274.607	1.0321	3.515	32.8299	0.656599	1.13798	8.61248	25.0836	0.501672	0.928884
252	Reg_8	Land_1	Bubulcus ibis	1	Human Modified	Omnivore	Terrestrial	249.019	1.16308	3.258	5.71837	0.0714796	0.306937	8.07495	35.0669	3.8633	0.619199
253	Reg_8	Land_1	Bubulcus ibis	1	Human Modified	Omnivore	Terrestrial	350.93	1.04156	4.281	23.8871	0.542888	0.934361	10.1409	53.7072	4.99049	1.18332
254	Reg_8	Land_1	Bubulcus ibis	4	Human Modified	Omnivore	Terrestrial	327.563	1.03783	4.048	34.4432	0.746269	0.988142	9.67771	89.4632	5.88966	2.27327
255	Reg_8	Land_1	Tachyphonus coronatus	1	Forest	Invertivore	Insessorial	428.199	1.02885	5.055	90.1979	10.4004	1.78042	11.6917	90.2535	13.5174	1.96721
256	Reg_8	Land_1	Bubulcus ibis	1	Human Modified	Omnivore	Terrestrial	226.463	1.26853	2.992	66.9782	1.24611	2.6738	7.44274	97.7979	7.9987	2.2841
257	Reg_8	Land_1	Bubulcus ibis	4	Human Modified	Omnivore	Terrestrial	240.43	1.04584	3.163	35.2682	0.661278	1.26462	7.89427	79.1717	5.78563	1.77344
258	Reg_8	Land_1	Sicalis flaveola	1	Shrubland	Granivore	Terrestrial	410.453	1.07759	4.865	55.9036	3.03614	1.2333	11.2863	62.5	6.74229	1.06324
259	Reg_8	Land_2	Eupsittula aurea	1	Grassland	Omnivore	Insessorial	219.719	1.06404	2.956	142.077	2.57611	5.07442	7.45787	143.27	2.73049	4.29077
260	Reg_8	Land_2	Sicalis flaveola	2	Shrubland	Granivore	Terrestrial	144.396	1.08187	2.209	121.721	2.3085	4.07424	5.97703	101.885	1.88528	3.01153
261	Reg_8	Land_2	Eupsittula aurea	8	Grassland	Omnivore	Insessorial	217.48	1.08479	2.93	137.332	2.60458	4.43686	7.40005	138.601	2.55829	4.05403
262	Reg_8	Land_2	Caracara plancus	1	Shrubland	Omnivore	Terrestrial	69.0786	8.62993	1.141	144.289	2.80561	4.38212	3.84715	91.7545	1.6739	2.59933
263	Reg_8	Land_2	Patagioenas picazuro	1	Forest	Omnivore	Generalist	252.825	3.74312	2.984	79.3021	1.82395	2.34584	6.9503	84.7811	1.66782	2.30206
264	Reg_8	Land_2	Tangara sayaca	2	Forest	Omnivore	Insessorial	97.4376	1.05678	1.74	105.125	1.83968	2.87356	5.05866	102.492	1.9276	3.16289
265	Reg_8	Land_2	Molothrus bonariensis	4	Woodland	Invertivore	Terrestrial	109.241	1.02661	1.863	47.088	0.991326	1.61031	5.30535	51.3977	0.991885	1.50791
266	Reg_8	Land_2	Sicalis flaveola	3	Shrubland	Granivore	Terrestrial	40.5806	1.13818	1.157	163.107	2.91262	5.18583	3.88773	98.6602	2.00974	2.82942
267	Reg_8	Land_2	Platalea ajaja	1	Wetland	Aquatic predator	Terrestrial	130.475	1.02314	2.077	97.2376	1.87845	3.37025	5.73662	82.5688	1.50125	2.61478
268	Reg_8	Land_4	Cyanocorax chrysops	1	Forest	Invertivore	Insessorial	22.511	1.08199	0.988	376.147	7.33945	9.10931	3.56102	291.055	7.40988	6.45883
269	Reg_8	Land_4	Phimosus infuscatus	4	Wetland	Aquatic predator	Terrestrial	90.0576	1.05144	1.66	295.989	5.80913	7.22892	4.89643	252.446	4.7456	5.92268
270	Reg_8	Land_4	Cyanocorax chrysops	4	Forest	Invertivore	Insessorial	128.796	1.04634	2.054	283.784	5.40541	9.25024	5.68989	385.684	10.2737	8.26026
271	Reg_8	Land_4	Patagioenas picazuro	1	Forest	Omnivore	Generalist	199.722	1.08069	2.757	317.032	13.7437	6.89155	7.07315	449.285	19.0265	8.90692
272	Reg_8	Land_5	Caracara plancus	2	Shrubland	Omnivore	Terrestrial	133.309	1.6574	2.017	299.304	18.2135	7.93257	5.45185	327	25.4529	5.31929
273	Reg_8	Land_5	Euphonia chlorotica	4	Forest	Frugivore	Insessorial	41.8736	1.09913	1.186	80.1527	1.14504	4.21585	3.94571	113.253	6.86747	2.5344
274	Reg_8	Land_5	Coereba flaveola	1	Shrubland	Nectarivore	Insessorial	58.184	1.11159	1.341	79.5848	1.21107	3.72856	4.24814	113.739	7.77027	2.82477
275	Reg_8	Land_5	Phimosus infuscatus	8	Wetland	Aquatic predator	Terrestrial	123.162	1.07014	1.985	135.356	14.9358	1.00756	5.52782	112.945	12.6412	2.17084
276	Reg_8	Land_5	Sicalis flaveola	2	Shrubland	Granivore	Terrestrial	56.8287	1.11705	1.331	62.1762	1.03627	3.00526	4.23329	124.014	6.98985	2.83467
277	Reg_8	Land_5	Tachycineta leucorrhoa	5	Grassland	Invertivore	Aerial	92.7768	1.30356	1.68	283.379	12.9428	7.14286	4.87598	296.333	23.8142	5.74244
278	Reg_8	Land_5	Trichothraupis melanops	1	Forest	Invertivore	Insessorial	63.8706	1.56505	1.34	86.0585	5.16351	0.746269	4.22181	100.679	8.93665	1.42119
279	Reg_8	Land_8	Colaptes campestris	1	Grassland	Invertivore	Terrestrial	103.755	1.01421	1.81	15.2478	0.635324	0.552486	5.20255	34.8944	2.06612	0.384427
280	Reg_8	Land_8	Colaptes campestris	1	Grassland	Invertivore	Terrestrial	118.491	1.04749	1.954	16.7464	0.598086	0.511771	5.48572	32.3851	2.10066	0.182291
281	Reg_8	Land_8	Patagioenas picazuro	3	Forest	Omnivore	Generalist	121.338	1.05593	1.981	0	0	0	5.52933	0	0	0
282	Reg_8	Land_8	Patagioenas picazuro	1	Forest	Omnivore	Generalist	165.323	1.07588	2.419	0	0	0	6.39212	22.6586	1.20846	0.312885
283	Reg_8	Land_8	Sicalis flaveola	4	Shrubland	Granivore	Terrestrial	125.638	1.02883	2.027	0	0	0	5.63323	0	0	0
284	Reg_8	Land_8	Sicalis flaveola	3	Shrubland	Granivore	Terrestrial	228.841	1.33334	2.936	0	0	0	7.22753	0	0	0
285	Reg_8	Land_8	Tangara sayaca	2	Forest	Omnivore	Insessorial	173.497	1.3096	2.378	0	0	0	6.21893	0	0	0
286	Reg_8	Land_9	Bubulcus ibis	1	Human Modified	Omnivore	Terrestrial	165.54	1.73861	1.999	76.2125	1.27021	3.0015	5.45214	54.4337	0.965759	2.20097
287	Reg_8	Land_9	Bubulcus ibis	1	Human Modified	Omnivore	Terrestrial	139.588	1.10233	2.135	8.65801	0.108225	0.468384	5.81044	89.404	3.39404	2.06525
288	Reg_8	Land_9	Bubulcus ibis	1	Human Modified	Omnivore	Terrestrial	138.077	1.0608	2.134	73.9935	1.19695	2.81162	5.84725	111.842	8.01809	2.56531
289	Reg_8	Land_9	Bubulcus ibis	1	Human Modified	Omnivore	Terrestrial	59.4806	1.02187	1.366	78.7671	1.5411	2.92826	4.31289	49.1895	0.894354	1.62304
290	Reg_8	Land_9	Bubulcus ibis	2	Human Modified	Omnivore	Terrestrial	157.402	1.04978	2.333	31.6832	0.792079	1.71453	6.2359	75.3267	4.18909	1.92434
291	Reg_8	Land_9	Caracara plancus	1	Shrubland	Omnivore	Terrestrial	194.081	1.05198	2.7	101.549	13.4251	2.22222	6.9683	122.801	18.3512	2.43962
292	Reg_8	Land_12	Patagioenas picazuro	1	Forest	Omnivore	Generalist	76.9267	1.02946	1.54	0	0	0	4.65922	0	0	0
293	Reg_8	Land_12	Vanellus chilensis	2	Grassland	Omnivore	Terrestrial	77.6805	1.05522	1.539	0	0	0	4.65206	0	0	0
294	Reg_8	Land_12	Progne tapera	5	Grassland	Invertivore	Aerial	93.1669	3.71576	1.233	0	0	0	4.01254	0	0	0
295	Reg_8	Land_12	Patagioenas picazuro	1	Forest	Omnivore	Generalist	70.6269	1.06532	1.471	0	0	0	4.51654	0	0	0
296	Reg_8	Land_12	Himantopus melanurus	2	NA	Aquatic predator	NA	47.8597	1.00445	1.251	0	0	0	4.0864	0	0	0
297	Reg_8	Land_12	Spatula cyanoptera	6	Wetland	Herbivore aquatic	Aquatic	85.6007	1.1325	1.6	0	0	0	4.74915	0	0	0
298	Reg_8	Land_12	Pitangus sulphuratus	7	Human Modified	Omnivore	Insessorial	18.2571	1.45854	0.927	0	0	0	3.43844	0	0	0
299	Reg_8	Land_12	Ardea alba	1	Wetland	Aquatic predator	Terrestrial	85.826	1.08238	1.617	0	0	0	4.79599	0	0	0
300	Reg_9	Land_2	Psittacara leucophthalmus	2	Forest	Omnivore	Insessorial	73.4168	1.07671	1.502	82.3171	4.87805	1.33156	4.57721	114.524	12.8579	1.09237
301	Reg_9	Land_2	Colaptes campestris	2	Grassland	Invertivore	Terrestrial	140.888	1.00324	2.182	162.963	20.3175	0.91659	5.94799	128.824	16.4654	0.672496
302	Reg_9	Land_3	Turdus spp	1	NA	Invertivore	NA	73.5579	1.04423	1.505	360.555	20.1849	5.31561	4.58086	188.285	16.2134	1.96469
303	Reg_9	Land_3	Pitangus sulphuratus	1	Human Modified	Omnivore	Insessorial	68.5603	1.08644	1.454	144.882	8.34646	2.75103	4.48212	176.188	13.7747	1.78487
304	Reg_9	Land_3	Sicalis flaveola	1	Shrubland	Granivore	Terrestrial	28.53	1.02435	1.058	309.368	12.854	5.67108	3.69794	183.581	11.6354	2.43379
305	Reg_9	Land_3	Trochilidae	1	NA	Nectarivore	NA	87.0306	1.05248	1.635	337.047	19.3593	4.89297	4.84227	183.874	16.2734	2.06515
306	Reg_9	Land_3	Stelgidopteryx ruficollis	1	Shrubland	Invertivore	Aerial	82.2341	13.707	1.119	325.956	23.7425	3.57462	3.8007	205	15.1875	2.6311
307	Reg_9	Land_3	Columbina talpacoti	1	Human Modified	Granivore	Terrestrial	77.2391	1.22368	1.533	236.527	18.1138	2.60926	4.6047	189.637	16.6839	1.95453
308	Reg_9	Land_4	Zonotrichia capensis	1	Shrubland	Omnivore	Generalist	124.407	1.00825	2.017	50.3432	2.28833	0.991572	5.61818	126.065	10.6474	1.42395
309	Reg_9	Land_4	Bubulcus ibis	1	Human Modified	Omnivore	Terrestrial	104.47	1.05257	1.809	40.7125	1.78117	0.552792	5.19399	146.611	10.0046	1.9253
310	Reg_9	Land_4	Geranoaetus albicaudatus	1	Grassland	Vertivore	Generalist	142.297	1.50463	1.804	25.4777	0.382166	0.554324	5.13233	9.31099	0.139665	0.194843
311	Reg_9	Land_4	Brotogeris chiriri	2	Forest	Omnivore	Insessorial	158.518	1.02414	2.358	0	0	0	6.29958	33.3839	0.644917	1.11119
312	Reg_9	Land_4	Eupsittula aurea	4	Grassland	Omnivore	Insessorial	156.682	1.02594	2.338	0	0	0	6.25792	74.9522	2.67686	1.59798
313	Reg_9	Land_4	Progne tapera	1	Grassland	Invertivore	Aerial	120.093	1.04076	1.965	37.4707	2.45902	0.508906	5.50164	85.2545	10.6568	0.90882
314	Reg_9	Land_4	Patagioenas picazuro	1	Forest	Omnivore	Generalist	131.482	1.11532	2.07	97.6693	17.4251	0.483092	5.69744	116.709	19.1856	0.877588
315	Reg_9	Land_7	Cariama cristata	1	Shrubland	Invertivore	Terrestrial	67.2404	1.07864	1.435	236.422	18.6901	5.57491	4.44301	214.707	33.6017	3.60116
316	Reg_9	Land_7	Tangara sayaca	1	Forest	Omnivore	Insessorial	45.7029	1.06176	1.227	262.357	39.1635	5.70497	4.03235	232.143	45.8333	3.47192
317	Reg_9	Land_8	Tangara sayaca	3	Forest	Omnivore	Insessorial	92.2201	1.06882	1.686	269.972	44.2149	2.9656	4.93655	191.86	68.3624	1.41799
318	Reg_9	Land_8	Patagioenas picazuro	1	Forest	Omnivore	Generalist	46.9321	1.03008	1.236	193.309	60.4089	2.42718	4.05505	224.057	68.2193	1.97285
319	Reg_9	Land_8	Zonotrichia capensis	1	Shrubland	Omnivore	Generalist	71.1237	1.01916	1.482	321.981	41.7957	5.39811	4.54676	220.357	66.1595	1.97943
320	Reg_9	Land_8	Zonotrichia capensis	1	Shrubland	Omnivore	Generalist	84.7666	1.10316	1.603	255.682	44.8864	3.74298	4.77023	188.094	68.2341	1.46744
321	Reg_9	Land_8	Pygochelidon cyanoleuca	8	Human Modified	Invertivore	Aerial	150.254	1.07953	2.269	282.209	42.4335	3.52578	6.09383	168.77	71.53	1.3128
322	Reg_9	Land_8	Nemosia pileata	8	Forest	Invertivore	Insessorial	69.8992	1.03949	1.466	157.895	51.7028	1.36426	4.51281	230.891	61.4655	1.99432
323	Reg_9	Land_8	Ramphastos toco	1	Grassland	Frugivore	Insessorial	160.45	1.05169	2.377	158.513	69.2759	0.841397	6.33081	200.608	64.6657	2.21141
324	Reg_9	Land_9	Stelgidopteryx ruficollis	1	Shrubland	Invertivore	Aerial	113.764	1.06237	1.908	289.157	26.0241	6.28931	5.39333	216.408	45.4989	2.78121
325	Reg_9	Land_10	Ramphastos toco	1	Grassland	Frugivore	Insessorial	119.8	1.18762	1.959	199.297	10.551	5.10465	5.4632	229.996	21.3817	4.94216
326	Reg_9	Land_10	Synallaxis spixi	1	Shrubland	Invertivore	Insessorial	71.9052	1.0975	1.49	120.556	2.47295	6.04027	4.54578	275.355	15.4493	6.15956
327	Reg_9	Land_11	Hirundinidae	1	NA	Invertivore	NA	49.956	1.54315	1.105	340.956	57.5884	3.61991	3.79008	233.438	64.795	3.16616
328	Reg_9	Land_11	Tangara sayaca	1	Forest	Omnivore	Insessorial	89.7598	1.03096	1.668	382.92	31.8182	5.9952	4.91915	249.515	45.2427	4.6756
329	Reg_9	Land_11	Brotogeris chiriri	4	Forest	Omnivore	Insessorial	81.5801	1.01422	1.587	483.871	46.7742	6.93132	4.75706	283.409	47.1508	3.15321
330	Reg_9	Land_11	Brotogeris chiriri	4	Forest	Omnivore	Insessorial	42.9589	1.04432	1.197	302.682	62.6437	4.17711	3.97286	239.521	67.2455	2.76879
331	Reg_9	Land_11	Caracara plancus	3	Shrubland	Omnivore	Terrestrial	111.415	1.1352	1.852	117.647	8.63579	3.23974	5.24491	208.887	24.5076	2.47859
332	Reg_9	Land_11	Caracara plancus	2	Shrubland	Omnivore	Terrestrial	130.058	1.07107	2.065	278.596	11.5515	6.77966	5.70004	235.095	26.7653	4.38593
333	Reg_9	Land_11	Hirundinidae	8	NA	Invertivore	NA	151.26	1.01892	2.286	335.366	29.878	5.68679	6.15394	205.148	41.5367	2.92496
334	Reg_9	Land_11	Caracara plancus	2	Shrubland	Omnivore	Terrestrial	134.481	1.16297	2.064	214.932	8.37104	4.84496	5.64044	218.817	14.7297	3.72312
335	Reg_10	Land_1	Chlorostilbon lucidus	1	Shrubland	Nectarivore	Aerial	48.9991	1.50535	1.207	60.6061	5.30303	0.8285	3.97452	67.5513	8.38359	0.754808
336	Reg_10	Land_1	Trochilidae	1	NA	Nectarivore	NA	63.1835	1.01912	1.403	63.0182	7.62852	0.712758	4.38941	84.0611	10.4258	0.683463
337	Reg_10	Land_1	Patagioenas picazuro	1	Forest	Omnivore	Generalist	215.995	15.2313	2.193	99.3658	19.0275	0.455996	5.69604	90.8708	9.92848	0.526682
338	Reg_10	Land_1	Tangara sayaca	1	Forest	Omnivore	Insessorial	170.41	1.12029	2.471	33.8664	1.50517	0.404694	6.51117	91.4792	8.9266	1.07508
339	Reg_10	Land_1	Aratinga auricapillus	6	Forest	Omnivore	Insessorial	183.466	1.02412	2.606	127.547	16.209	1.15119	6.79614	85.3616	8.71252	0.58857
340	Reg_10	Land_1	Trochilidae	1	NA	Nectarivore	NA	94.1944	1.08516	1.707	121.786	20.2977	0.585823	4.98325	92.0863	10.9353	0.200672
341	Reg_10	Land_1	Melanerpes candidus	1	Grassland	Frugivore	Insessorial	59.997	1.00411	1.373	32.9489	1.81219	0.728332	4.33007	94.4018	3.07355	2.07849
342	Reg_10	Land_2	Saltator fuliginosus	1	Forest	Invertivore	Insessorial	65.6752	1.14688	1.419	183.871	11.4516	1.40944	4.39971	107.375	10.1952	0.90915
343	Reg_10	Land_2	Saltator fuliginosus	1	Forest	Invertivore	Insessorial	64.7606	1.02303	1.418	163.132	6.68842	2.11566	4.41837	135.575	11.4425	1.13164
344	Reg_10	Land_2	Zonotrichia capensis	1	Shrubland	Omnivore	Generalist	93.1709	1.04191	1.699	148.76	6.74931	1.76574	4.97458	137.397	13.1108	1.00511
345	Reg_10	Land_2	Psittacara leucophthalmus	12	Forest	Omnivore	Insessorial	126.763	1.18432	1.975	51.3419	0.933489	2.02532	5.45847	131.349	9.85114	2.01522
346	Reg_10	Land_2	Cyanoloxia brissonii	1	Forest	Frugivore	Insessorial	78.1758	1.0063	1.554	154.993	6.55738	1.9305	4.6922	114.169	7.9001	1.70496
347	Reg_10	Land_2	Cyanoloxia brissonii	1	Forest	Frugivore	Insessorial	66.8023	1.01308	1.439	115.942	4.66989	1.38985	4.46235	149.704	13.4626	1.34458
348	Reg_10	Land_3	Patagioenas picazuro	1	Forest	Omnivore	Generalist	83.3216	1.03275	1.605	131.054	2.5641	3.11526	4.79437	75.6972	1.39442	2.08578
349	Reg_10	Land_6	Tangara sayaca	1	Forest	Omnivore	Insessorial	79.1654	1.01228	1.564	97.7778	12	0.639386	4.71024	66.1578	10.9415	0.212303
350	Reg_10	Land_6	Tangara sayaca	1	Forest	Omnivore	Insessorial	79.1671	1.03478	1.562	97.3451	11.7994	0.640205	4.70033	65.0407	10.7724	0.212751
351	Reg_10	Land_6	Zonotrichia capensis	1	Shrubland	Omnivore	Generalist	97.805	1.02514	1.745	112	16.5333	0.573066	5.06941	90.1756	13.0992	0.197262
352	Reg_10	Land_6	Turdus amaurochalinus	1	Forest	Invertivore	Insessorial	85.455	1.00862	1.627	109.705	15.6118	0.614628	4.83698	83.8678	12.4815	0.206741
353	Reg_10	Land_6	Turdus amaurochalinus	1	Forest	Invertivore	Insessorial	114.718	1.04024	1.912	4.85437	0.121359	0.523013	5.40162	28.5078	3.20713	0.18513
354	Reg_10	Land_6	Turdus amaurochalinus	1	Forest	Invertivore	Insessorial	80.1102	1.02735	1.572	5.80552	0.145138	0.636132	4.72317	66.5994	9.38446	0.211722
355	Reg_10	Land_6	Psittacara leucophthalmus	1	Forest	Omnivore	Insessorial	37.1366	1.01852	1.143	107.784	9.78044	0.874891	3.86782	81.2808	12.6847	0.258544
356	Reg_10	Land_6	Psittacara leucophthalmus	1	Forest	Omnivore	Insessorial	38.4964	1.0421	1.155	103.175	9.3254	0.865801	3.89117	79.6569	12.6225	0.256992
357	Reg_10	Land_7	Sicalis flaveola	1	Shrubland	Granivore	Terrestrial	127.563	1.09551	2.038	0	0	0	5.63554	22.0339	1.73729	0.354891
358	Reg_10	Land_7	Sicalis flaveola	5	Shrubland	Granivore	Terrestrial	35.4938	1.0472	1.124	52.3139	2.41449	0.88968	3.83101	70.632	9.10781	0.261028
359	Reg_10	Land_7	Zenaida auriculata	1	Human Modified	Granivore	Terrestrial	326.114	1.0043	4.035	93.4795	10.8482	0.495663	9.65339	95.0722	15.8039	0.207181
360	Reg_10	Land_7	Patagioenas picazuro	1	Forest	Omnivore	Generalist	228.16	1.06807	3.052	0	0	0	7.67658	13.7672	0.782228	0.260533
361	Reg_10	Land_7	Turdus amaurochalinus	1	Forest	Invertivore	Insessorial	133.268	1.01789	2.105	0	0	0	5.79273	0	0	0
362	Reg_10	Land_7	Sicalis flaveola	2	Shrubland	Granivore	Terrestrial	54.3837	1.1091	1.305	0	0	0	4.18275	20.5128	1.25356	0.239077
363	Reg_10	Land_7	Zonotrichia capensis	1	Shrubland	Omnivore	Generalist	123.17	1.11254	2.003	0	0	0	5.58068	51.5907	7.7816	0.17919
364	Reg_10	Land_7	Zenaida auriculata	2	Human Modified	Granivore	Terrestrial	384.466	3.82448	3.185	0	0	0	7.39867	34.4268	3.79994	0.135159
365	Reg_10	Land_7	Zenaida auriculata	1	Human Modified	Granivore	Terrestrial	314.474	1.00954	3.918	53.2544	3.60947	0.765697	9.41925	74.4898	10.9949	0.212331
366	Reg_10	Land_7	Zenaida auriculata	3	Human Modified	Granivore	Terrestrial	133.252	1.07662	2.1	77.1775	5.18192	0.952381	5.77707	77.2425	11.6279	0.173098
367	Reg_10	Land_11	Patagioenas picazuro	3	Forest	Omnivore	Generalist	130.362	1.12097	2.071	17.8971	0.33557	0.965717	5.71097	15.0943	0.377358	0.350203
368	Reg_10	Land_11	Patagioenas picazuro	2	Forest	Omnivore	Generalist	126.891	1.01088	2.042	4.51467	0.112867	0.489716	5.66807	38.9336	0.93102	0.882135
369	Reg_10	Land_15	Crotophaga ani	3	Human Modified	Omnivore	Insessorial	111.265	1.00851	1.886	34.3137	0.612745	1.06045	5.35473	30.4251	0.581655	0.933755
370	Reg_10	Land_15	Aratinga auricapillus	1	Forest	Omnivore	Insessorial	302.448	1.01103	3.798	62.7306	6.64207	1.05319	9.17995	60.3358	10.703	0.762531
371	Reg_10	Land_15	Aratinga auricapillus	1	Forest	Omnivore	Insessorial	243.187	1.01627	3.204	56.196	2.59366	1.24844	7.99128	43.2432	1.53153	0.875955
372	Reg_10	Land_15	Galbula ruficauda	1	Forest	Invertivore	Insessorial	95.9258	5.74767	1.424	0	0	0	4.34563	29.654	1.15321	0.920466
373	Reg_10	Land_15	Crotophaga ani	3	Human Modified	Omnivore	Insessorial	372.646	1.02263	4.498	73.3753	11.5304	1.33393	10.5792	61.2431	17.7331	0.756204
374	Reg_10	Land_15	Pseudastur polionotus	1	Forest	Vertivore	Insessorial	161.913	1.16571	2.376	85.9375	3.41797	1.26263	6.26741	70.5521	2.1089	1.436
375	Reg_12	Land_9	Patagioenas picazuro	1	Forest	Omnivore	Generalist	114.026	1.11714	1.909	225.455	8.9697	4.71451	5.3891	186.584	20.7463	2.96896
376	Reg_12	Land_9	Patagioenas picazuro	1	Forest	Omnivore	Generalist	115.507	1.01991	1.927	203.349	20.2153	4.15153	5.43713	191.733	27.8364	2.94273
377	Reg_12	Land_9	Caracara plancus	1	Shrubland	Omnivore	Terrestrial	122.244	1.05622	1.992	175.723	8.43931	4.01606	5.5644	161.625	17.07	3.05514
378	Reg_12	Land_9	Caracara plancus	3	Shrubland	Omnivore	Terrestrial	136.613	1.07651	2.134	97.0874	44.2287	0.937207	5.84039	140.279	43.9295	2.22588
379	Reg_12	Land_9	Ramphastos toco	3	Grassland	Frugivore	Insessorial	294.802	1.009	3.722	173.585	6.54088	3.76142	9.02659	174.099	22.1629	2.7696
380	Reg_12	Land_10	Patagioenas picazuro	1	Forest	Omnivore	Generalist	65.4466	1.00181	1.427	162.075	32.577	2.10231	4.43807	140.313	44.7383	2.02791
381	Reg_12	Land_10	Zenaida auriculata	1	Human Modified	Granivore	Terrestrial	127.828	1.00798	2.05	225.734	34.9887	2.43902	5.68283	141.653	41.9056	1.93566
382	Reg_12	Land_10	Zenaida auriculata	7	Human Modified	Granivore	Terrestrial	194.344	1.17799	2.704	160	39.4043	2.95858	6.95729	121.441	38.2161	2.29975
383	Reg_12	Land_10	Ramphastos toco	2	Grassland	Frugivore	Insessorial	183.36	1.40325	2.568	177.055	35.0497	3.11526	6.55407	122.121	36.9653	1.9835
384	Reg_12	Land_10	Psittacara leucophthalmus	20	Forest	Omnivore	Insessorial	209.437	3.1169	2.474	184.586	26.0704	2.82943	6.21646	163.503	39.0934	2.09122
385	Reg_12	Land_10	Camptostoma obsoletum	1	Shrubland	Invertivore	Insessorial	39.8479	13.0458	0.978	170.507	23.7327	3.06748	3.5338	123.656	35.0806	1.69789
386	Reg_12	Land_10	Trochilidae	1	NA	Nectarivore	NA	112.792	1.03963	1.899	220.339	44.1889	2.10637	5.37719	137.684	52.9727	1.67374
387	Reg_12	Land_10	Milvago chimachima	1	Grassland	Omnivore	Terrestrial	66.6846	1.05723	1.438	155.803	37.5199	2.08623	4.45504	126.136	46.0182	1.79572
388	Reg_12	Land_10	Psittacara leucophthalmus	4	Forest	Omnivore	Insessorial	194.795	1.01284	2.72	209.006	35.599	2.57353	7.02213	132.924	44.8875	1.70888
389	Reg_12	Land_11	Psittacara leucophthalmus	7	Forest	Omnivore	Insessorial	78.3199	1.02654	1.553	141.593	30.236	1.93175	4.68679	108.906	34.8601	1.28019
390	Reg_12	Land_11	Psittacara leucophthalmus	30	Forest	Omnivore	Insessorial	84.0356	1.02333	1.613	181.56	30.3546	2.47985	4.80662	141.795	32.6227	1.66437
391	Reg_12	Land_11	Patagioenas picazuro	1	Forest	Omnivore	Generalist	117.955	1.13295	1.942	174.528	41.0377	1.5448	5.4384	129.939	31.6945	1.28714
392	Reg_12	Land_12	Caracara plancus	1	Shrubland	Omnivore	Terrestrial	67.685	1.00741	1.449	212.025	23.1013	1.38026	4.48193	169.963	20.5772	2.00806
393	Reg_12	Land_12	Caracara plancus	1	Shrubland	Omnivore	Terrestrial	75.2224	1.01759	1.525	213.213	14.8649	2.62295	4.63213	165.553	16.5553	2.15883
394	Reg_12	Land_12	Zonotrichia capensis	1	Shrubland	Omnivore	Generalist	52.9641	1.01585	1.299	258.29	34.904	1.53965	4.18448	192.045	25.3977	2.38979
395	Reg_12	Land_12	Troglodytes aedon	1	Shrubland	Invertivore	Insessorial	19.111	1.06136	0.96	238.876	9.36768	4.16667	3.50397	202.977	8.66035	4.28086
396	Reg_12	Land_12	Brotogeris chiriri	2	Forest	Omnivore	Insessorial	91.4357	1.12449	1.678	218.281	19.0996	2.38379	4.91306	183.673	19.7765	2.64601

## Sheet: Table S4 species
Table S3. Number of bird movements recorded and classified by their habitatpreferences. Each entry represents the number of observed matrix movements associated with their habitat preferences, for each species. Species were classified as forest-dependent if they were listed as occurring in Forest or Woodland habitats in the AVONET database (Tobias et al. 2022). The total number of movements recor…
Species	Forest	Grassland	Human Modified	Marine	Riverine	Rock	Shrubland	Wetland	Woodland	Total Geral
Amazilia lactea	1									1
Amazonetta brasiliensis								7		7
Ammodramus humeralis		1								1
Anhinga anhinga								1		1
Aratinga auricapillus	61									61
Ardea alba								16		16
Ardea cocoi								4		4
Arundinicola leucocephala								1		1
Brotogeris chiriri	61									61
Bubulcus ibis			145							145
Buteo brachyurus	4									4
Buteogallus meridionalis		3								3
Cairina moschata								3		3
Campephilus robustus	5									5
Camptostoma obsoletum							8			8
Caracara plancus							71			71
Cariama cristata							8			8
Certhiaxis cinnamomeus								3		3
Chloroceryle amazona					1					1
Chlorostilbon lucidus							5			5
Chrysomus ruficapillus								112		112
Coereba flaveola							1			1
Colaptes campestris		9								9
Colonia colonus	1									1
Columba livia			1							1
Columbina talpacoti			13							13
Coragyps atratus			63							63
Crotophaga ani			13							13
Cyanocorax chrysops	5									5
Cyanocorax cristatellus									6	6
Cyanoloxia brissonii	4									4
Dacnis cayana	6									6
Dendrocygna autumnalis								6		6
Dendrocygna viduata								3		3
Egretta thula								4		4
Elaenia flavogaster									6	6
Eupetomena macroura							4			4
Euphonia chlorotica	4									4
Eupsittula aurea		96								96
Falco sparverius		2								2
Fluvicola nengeta								4		4
Forpus xanthopterygius	9									9
Furnarius rufus							1			1
Galbula ruficauda	1									1
Gallinula galeata								3		3
Geranoaetus albicaudatus		4								4
Guira guira			1							1
Himantopus himantopus								3		3
Hirundinea ferruginea						3				3
Hirundo rustica			17							17
Jacana jacana								3		3
Knipolegus lophotes							1			1
Leistes superciliaris		1								1
Lepidocolaptes angustirostris									1	1
Machetornis rixosa		3								3
Megaceryle torquata					2					2
Melanerpes candidus		1								1
Mesembrinibis cayennensis	15									15
Milvago chimachima		6								6
Mimus saturninus							5			5
Molothrus bonariensis									18	18
Myiothlypis flaveola									1	1
Myiozetetes similis							3			3
Nannopterum brasilianus								1		1
Nemosia pileata	11									11
Pandion haliaetus				1						1
Patagioenas picazuro	221									221
Phacellodomus ruber							1			1
Phacellodomus rufifrons							1			1
Pionus maximiliani	5									5
Pitangus sulphuratus			5							5
Platalea ajaja								1		1
Progne tapera		25								25
Psarocolius decumanus	5									5
Pseudoleistes guirahuro			28							28
Psittacara leucophthalmus	519									519
Pygochelidon cyanoleuca			12							12
Pyrocephalus rubinus									1	1
Ramphastos toco		66								66
Saltator fuliginosus	2									2
Sicalis flaveola							247			247
Sicalis luteola		32								32
Sporophila bouvreuil		1								1
Sporophila caerulescens							12			12
Sporophila lineola							1			1
Sporophila nigricollis							2			2
Stelgidopteryx ruficollis							42			42
Streptoprocne zonaris	1									1
Synallaxis spixi							3			3
Tachycineta albiventer					10					10
Tachycineta leucorrhoa		40								40
Tachyphonus coronatus	9									9
Tangara cayana	17									17
Tangara palmarum	8									8
Tangara sayaca	83									83
Tersina viridis	3									3
Thalurania glaucopis	1									1
Theristicus caudatus		5								5
Thlypopsis sordida	1									1
Trichothraupis melanops	3									3
Troglodytes aedon							2			2
Turdus amaurochalinus	7									7
Turdus leucomelas	5									5
Tyrannus melancholicus			3							3
Tyrannus savana		2								2
Vanellus chilensis		14								14
Xolmis irupero			1							1
Xolmis velatus							12			12
Zenaida auriculata			32							32
Zonotrichia capensis							46			46
Total Geral	1078	311	334	1	13	3	476	175	33	2424

## Sheet: Table S5model selection
Table S1. Model selection results for predictors of total distance traveled and sinuosity in bird movement. Models were ranked using Akaike Information Criterion corrected for small sample sizes (AICc). Columns show the fixed effects included in each model, their estimated coefficients (when applicable), model degrees of freedom (df), log-likelihood (logLik), ΔAICc, and Akaike weights. Diagnostic…
Reponse variables	Model_ID	cnd((Int))	dsp((Int))	cnd(PLAND_50)	cnd(primary lifestyle)	cnd(DENS_NP50)	cnd(ED _50)	cnd(trophic niche)	cnd(ED _50:trophic niche)	df	logLik	AICc	delta	weight	Collinearity (VIF)	KS test: p (Deviation)	Dispersion test: p (Deviation)	Outlier tes: p (deviation)
Total distance traveled	8	4.517	+				-0.8813	+	+	10	-880.718	1782.9	0	0.721	>35	0.703 (n.s.)	0.624 (n.s.)	1 (n.s.)
	35	4.279	+				-0.1355	+		8	-883.927	1784.8	1.9	0.279	<1.1	0.496 (n.s.)	0.615 (n.s.)	0.370 (n.s.)
Sinuosity	7	0.188	+			-0.2205	0.2308			7	-113.764	242.3	0	0.289	3.5	0 (n.s.)	0 (n.s.)	0.041 (n.s.)
	9	0.1762	+	0.1221						6	-114.881	242.3	0.05	0.282
	25	0.3689	+	0.1192	+					8	-112.852	242.6	0.39	0.238
	11	0.1789	+	0.1257		-0.0433				7	-114.183	243.1	0.84	0.19

## Sheet: Table S6 segmented regression
Table S4. Best model results for each trophic niche, showing selected spatial scale, breakpoint value, and AIC.
Trophic niche	Best scale	Breakpoint (%)	Direction	Model AIC
Omnivore	100m	45.7	decline after breakpoint	959.2
Invertivore	100m	7.2	decline after breakpoint	950.3
Frugivore	50m	13.8	decline after breakpoint	115.1
